# Supplementary material for: Valeriana pilosa Roots Essential Oil: Chemical Composition, Antioxidant Activities, and Molecular Docking Studies on Enzymes Involved in Redox Biological Processes
Source: MDPI journal article supplement (doi:10.3390/antiox11071337), 2022-07-07
Supplement: s1 [file s1]

## SUPPLEMENTARY MATERIAL

| Figure                                                                                                                                                                                                                                                                                       | Pag.     |
|----------------------------------------------------------------------------------------------------------------------------------------------------------------------------------------------------------------------------------------------------------------------------------------------|----------|
| <b>Figure S1.</b> Superposition of the co-crystal warfarine (cyan color) with its docked pose (green color) bound to CYP2C9. Here, complex alignment was performed with respect to ligand and position conformation of the aligned ligands was calculated in terms of RMSD values.           | S4       |
| <b>Figure S2.</b> Superposition of the co-crystal quercetin (cyan color) with its docked pose (green color) bound to Xanthine Oxidase. Here, complex alignment was performed with respect to ligand and position conformation of the aligned ligands was calculated in terms of RMSD values. | S4       |
| <b>Figure S3.</b> Molecular Docking visualization for the abundant compounds identified in the VPEO bound to CYP2C9 and Xanthine Oxidase.                                                                                                                                                    | S5       |
| <b>Figure S4.</b> Heat map of the score normalization based on the number of non-Hydrogen Atoms values (kcal·mol <sup>-1</sup> ) of VPEO components.                                                                                                                                         | S6       |
| Table                                                                                                                                                                                                                                                                                        | Pag.     |
| <b>Table S1.</b> Canonical SMILES of 47 <i>Valeriana pilosa</i> essential oils used for ligand efficiency studies.                                                                                                                                                                           | S7 – S8  |
| <b>Table S2.</b> Complete results for essential oils from <i>Valeriana pilosa</i> with CYP2C9 target: Intermolecular docking energy values ( $\Delta E_{binding}$ ), Kd values,                                                                                                              | S9 – S10 |

|                                                                                                                                                                                                                                                                                                                                |           |
|--------------------------------------------------------------------------------------------------------------------------------------------------------------------------------------------------------------------------------------------------------------------------------------------------------------------------------|-----------|
| Ligand Efficiency ( <i>LE</i> ), Binding Efficiency Index ( <i>BEI</i> ), and Lipophilic Ligand Efficiency ( <i>LLE</i> )                                                                                                                                                                                                      |           |
| <b>Table S3.</b> Complete results for essential oils from <i>Valeriana pilosa</i> with Catalase target: Intermolecular docking energy values ( $\Delta E_{binding}$ ), <i>Kd</i> values, Ligand Efficiency ( <i>LE</i> ), Binding Efficiency Index ( <i>BEI</i> ), and Lipophilic Ligand Efficiency ( <i>LLE</i> )             | S11 – S12 |
| <b>Table S4.</b> Complete results for essential oils from <i>Valeriana pilosa</i> with Superoxide Dismutase target: Intermolecular docking energy values ( $\Delta E_{binding}$ ), <i>Kd</i> values, Ligand Efficiency ( <i>LE</i> ), Binding Efficiency Index ( <i>BEI</i> ), and Lipophilic Ligand Efficiency ( <i>LLE</i> ) | S13 – S14 |
| <b>Table S5.</b> Complete results for essential oils from <i>Valeriana pilosa</i> with Xanthine Oxidase target: Intermolecular docking energy values ( $\Delta E_{binding}$ ), <i>Kd</i> values, Ligand Efficiency ( <i>LE</i> ), Binding Efficiency Index ( <i>BEI</i> ), and Lipophilic Ligand Efficiency ( <i>LLE</i> )     | S15 – S16 |
| <b>Table S6.</b> mol2 files for all compounds studied in this work.                                                                                                                                                                                                                                                            | S16 – S72 |

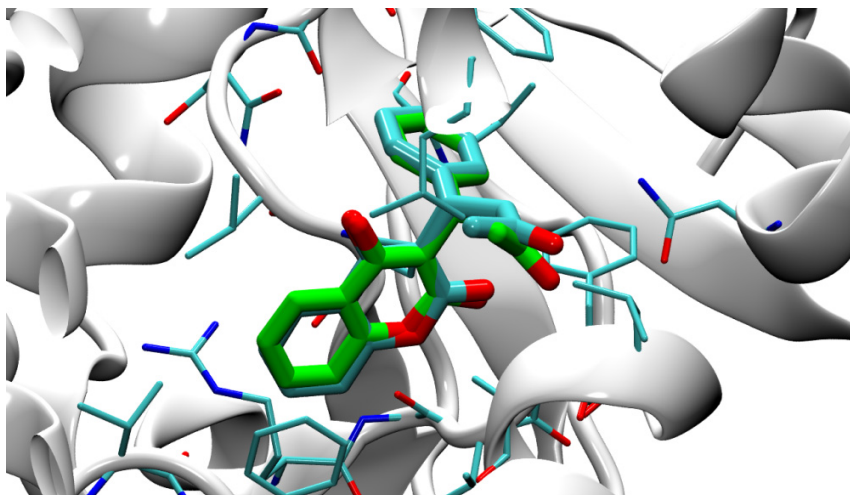

**Figure S1.** Superposition of the co-crystal warfarine (cyan color) with its docked pose (green color) bound to CYP2C9. Here, complex alignment was performed with respect to ligand and position conformation of the aligned ligands was calculated in terms of RMSD values.

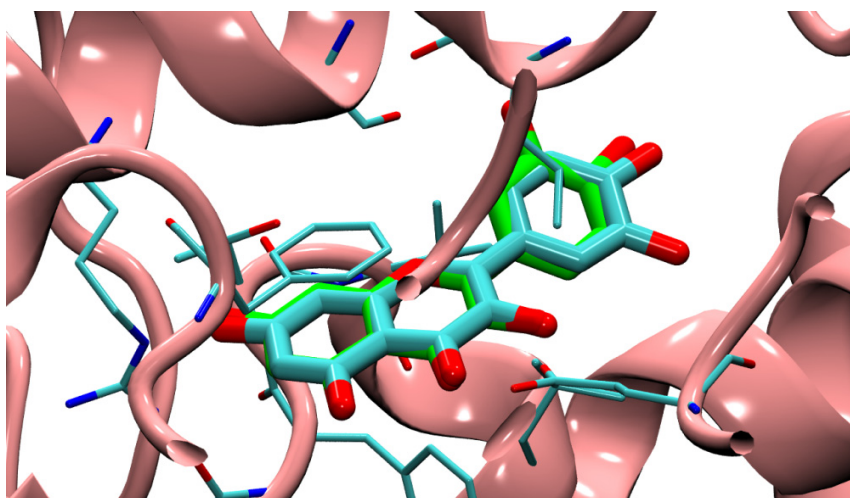

**Figure S2.** Superposition of the co-crystal quercetin (cyan color) with its docked pose (green color) bound to Xanthine Oxidase. Here, complex alignment was performed with respect to ligand and position conformation of the aligned ligands was calculated in terms of RMSD values.

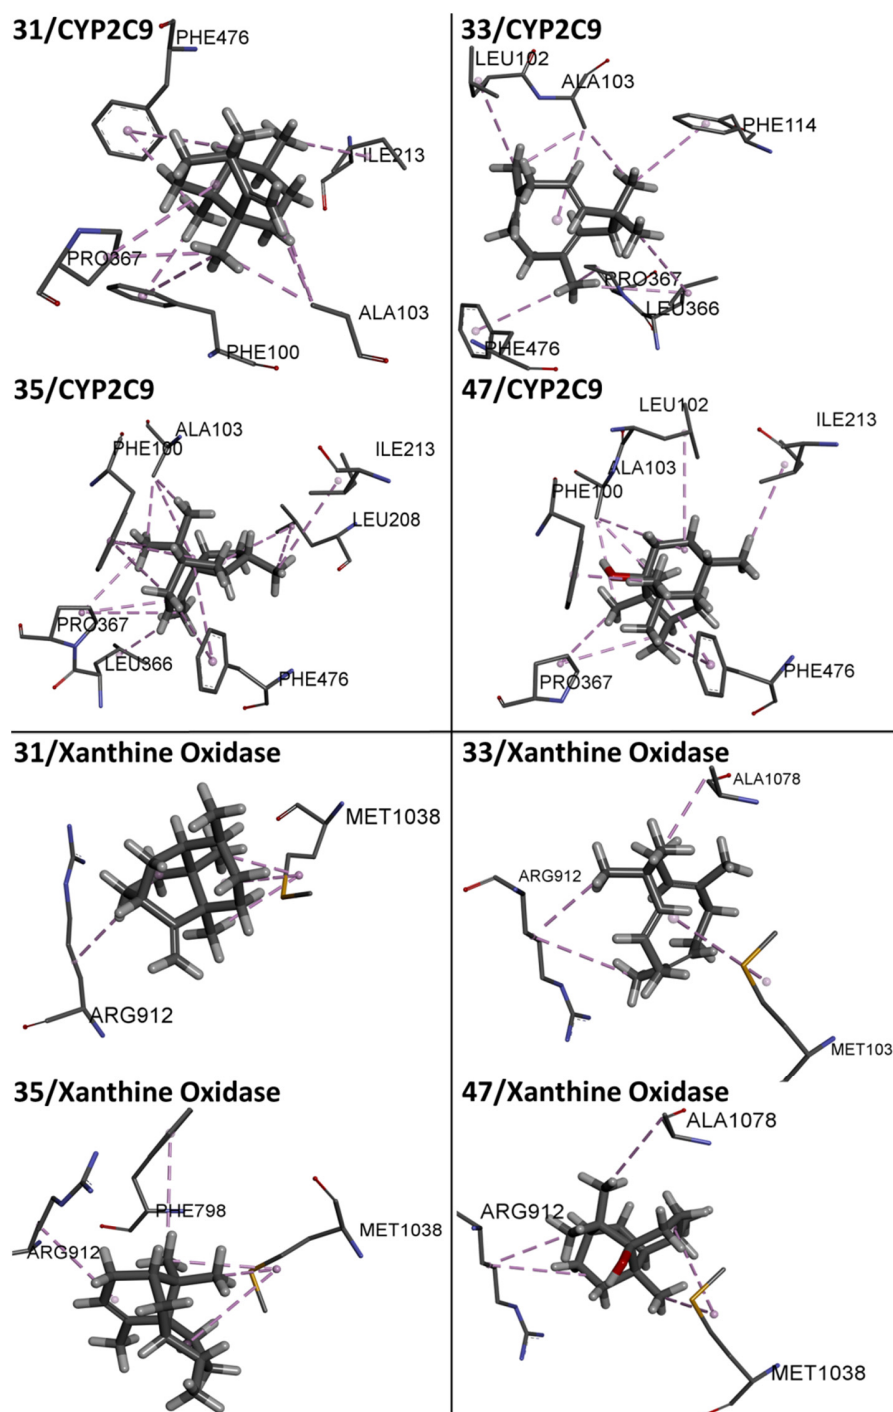

**Figure S3.** Molecular Docking visualization for the abundant compounds identified in the VPEO bound to CYP2C9 and Xanthine Oxidase.

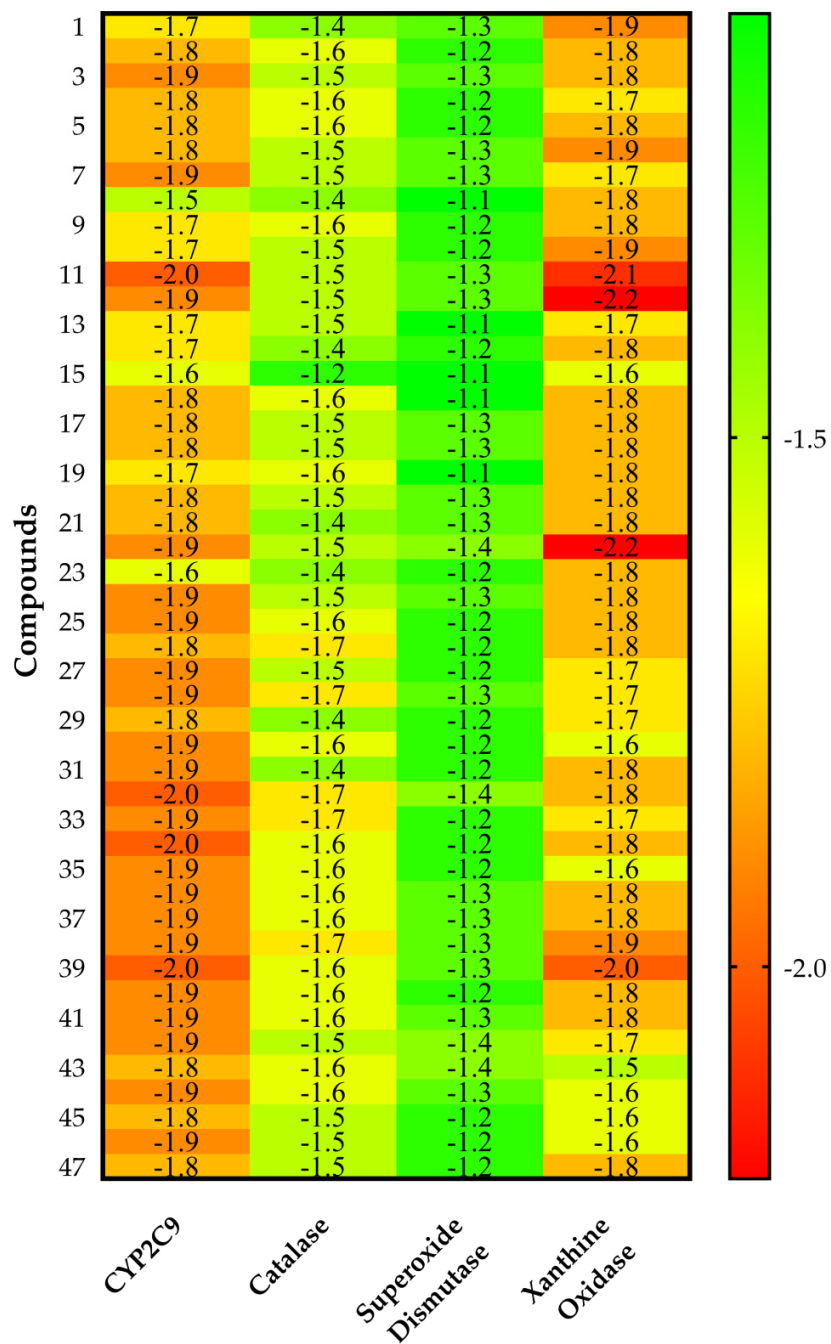

**Figure S4.** Heat map of the score normalization based on the number of non-Hydrogen Atoms values ( $\text{kcal}\cdot\text{mol}^{-1}$ ) of VPEO components.

**Table S1.** Canonical SMILES of 47 *Valeriana pilosa* essential oils used for ligand efficiency studies.

| N° | Compound Name          | Canonical SMILES                                                          |
|----|------------------------|---------------------------------------------------------------------------|
| 1  | Isovaleric acid        | <chem>CC(CC(=O)O)C</chem>                                                 |
| 2  | Tricyclene             | <chem>C[C@]12[C@@H]3[C@H]1C[C@H](C2(C)C)C3</chem>                         |
| 3  | $\alpha$ -Thujene      | <chem>CC1=CC[C@@]2([C@H]1C2)C(C)C</chem>                                  |
| 4  | $\alpha$ -Pinene       | <chem>CC1=CC[C@H]2C[C@@H]1C2(C)C</chem>                                   |
| 5  | Camphene               | <chem>C=C1[C@H]2CC[C@@H](C1(C)C)C2</chem>                                 |
| 6  | 3-Methyl valeric acid  | <chem>C[C@H](CC)CC(=O)O</chem>                                            |
| 7  | Sabinene               | <chem>C=C1CC[C@@]2([C@H]1C2)C(C)C</chem>                                  |
| 8  | 1-Octen-3-ol           | <chem>CCCCC[C@H](C=C)O</chem>                                             |
| 9  | $\beta$ -Pinene        | <chem>C=C1CC[C@H]2C[C@@H]1C2(C)C</chem>                                   |
| 10 | Myrcene                | <chem>C=CC(=C)CCC=C(C)C</chem>                                            |
| 11 | Limonene               | <chem>CC1=CC[C@@H](CC1)C(=C)C</chem>                                      |
| 12 | <i>p</i> -Cymene       | <chem>Cc1ccc(cc1)C(C)C</chem>                                             |
| 13 | 1,8-Cineole            | <chem>C[C@]12CC[C@H](CC1)C(O2)(C)C</chem>                                 |
| 14 | Linalool               | <chem>C=C[C@](CCC=C(C)C)(O)C</chem>                                       |
| 15 | Isopentyl isovalerate  | <chem>CC(CCOC(=O)CC(C)C)C</chem>                                          |
| 16 | Camphor                | <chem>O=C1C[C@H]2C([C@]1(C)CC2)(C)C</chem>                                |
| 17 | Menthone               | <chem>C[C@@H]1CC[C@@H](C(=O)C1)C(C)C</chem>                               |
| 18 | Isomenthone            | <chem>C[C@@H]1CC[C@@H](C(=O)C1)C(C)C</chem>                               |
| 19 | Borneol                | <chem>O[C@@H]1C[C@H]2C([C@]1(C)CC2)(C)C</chem>                            |
| 20 | Neomenthol             | <chem>C[C@H]1CC[C@H]([C@@H](C1)O)C(C)C</chem>                             |
| 21 | Menthol                | <chem>C[C@@H]1CC[C@H]([C@H](C1)O)C(C)C</chem>                             |
| 22 | Carvone                | <chem>CC(=C)[C@@H]1CC=C(C(=O)C1)C</chem>                                  |
| 23 | Menthyl acetate        | <chem>C[C@@H]1CC[C@H]([C@@H](C1)OC(=O)C)C(C)C</chem>                      |
| 24 | $\alpha$ -Cubebene     | <chem>CC([C@H]1CC[C@H]([C@@]23[C@@H]1[C@@H]2C(=CC3)C)C)C</chem>           |
| 25 | Cyclosativene          | <chem>CC([C@H]1CC[C@@H]([C@@]23[C@@H]1[C@@H]2[C@@H]([C@]21C)C3)C)C</chem> |
| 26 | $\alpha$ -Copaene      | <chem>C[C@@H]1CC[C@@]2([C@@H]3[C@H]1[C@H]2C(=CC3)C)C</chem>               |
| 27 | $\beta$ -Patchoulene   | <chem>C[C@@H]1CCC2=C1C[C@H]1CC[C@@]2(C1(C)C)C</chem>                      |
| 28 | $\beta$ -Bourbonene    | <chem>CC([C@@H]1CC[C@@]2([C@H]1[C@@H]1C(=C)CC[C@H]21)C)C</chem>           |
| 29 | $\beta$ -Elemene       | <chem>C=C[C@@]1(C)CC[C@H](C[C@H]1C(=C)C)C(=C)C</chem>                     |
| 30 | $\beta$ -Caryophyllene | <chem>C[C@H]1CCCC(=C)[C@H]2[C@H](CC1)C(C2)(C)C</chem>                     |
| 31 | Seychellene            | <chem>C[C@H]1CC[C@@]2([C@@]3([C@H]1C[C@H](C2=C)CC3)C)C</chem>             |
| 32 | $\alpha$ -Guaiene      | <chem>CC(=C)[C@@H]1CC[C@@H](C2=C(C1)[C@@H](C)CC2)C</chem>                 |
| 33 | $\alpha$ -Humulene     | <chem>CC1=CCC(C)(C)C=CCC(=CCC1)C</chem>                                   |
| 34 | allo-Aromadendrene     | <chem>C[C@H]1CC[C@@H]2[C@H]1[C@@H]1[C@@H](C1(C)C)CCC2=C</chem>            |
| 35 | $\alpha$ -Patchoulene  | <chem>C[C@H]1CC[C@]23[C@@H]1C[C@@H](C3(C)C)CC=C2C</chem>                  |

|    |                              |                                                                  |
|----|------------------------------|------------------------------------------------------------------|
| 36 | $\gamma$ -Muurolene          | <chem>CC1=C[C@H]2[C@@H](CC1)C(=C)CC[C@@H]2C(C)C</chem>           |
| 37 | Germacrene-D                 | <chem>CC1=CCCC(=C)C=C[C@@H](CC1)C(C)C</chem>                     |
| 38 | Valencene                    | <chem>CC(=C)[C@@H]1CCC2=CCC[C@H]([C@]2(C1)C)C</chem>             |
| 39 | Eremophyllene                | <chem>CC(=C)[C@@H]1CC[C@@H]2[C@](C1)(C)C(=CCC2)C</chem>          |
| 40 | $\gamma$ -Cadinene           | <chem>CC1=C[C@@H]2[C@H](CC1)C(=C)CC[C@@H]2C(C)C</chem>           |
| 41 | 7-epi- $\alpha$ -Selinene    | <chem>CC1=CCC[C@]2([C@@H]1C[C@@H](CC2)C(=C)C)C</chem>            |
| 42 | $\delta$ -Cadinene           | <chem>CC1=C[C@H]2C(=C(C)CC[C@H]2C(C)C)CC1</chem>                 |
| 43 | Spathulenol                  | <chem>C=C1CC[C@H]2[C@@H]([C@@H]3[C@@H]1CC[C@]3(C)O)C2(C)C</chem> |
| 44 | $\beta$ -Caryophyllene oxide | <chem>C=C1CC[C@@H]2O[C@@]2(CC[C@@H]2[C@@H]1CC2(C)C)C</chem>      |
| 45 | T-Cadinol                    | <chem>CC1=C[C@H]2[C@@H](CC1)[C@@](C)(O)CC[C@H]2C(C)C</chem>      |
| 46 | $\delta$ -Cadinol            | <chem>CC1=C[C@H]2[C@@H](CC1)[C@@](C)(O)CC[C@H]2C(C)C</chem>      |
| 47 | Patchoulol                   | <chem>C[C@H]1CC[C@@]2([C@@]3([C@H]1C[C@H](C2(C)C)CC3)C)O</chem>  |

**Table S2.** Complete results for essential oils from *Valeriana pilosa* with CYP2C9 target: Intermolecular docking energy values ( $\Delta E_{binding}$ ),  $K_d$  values, Ligand Efficiency ( $LE$ ), Binding Efficiency Index ( $BEI$ ), and Lipophilic Ligand Efficiency ( $LLE$ )

| Compound               | $\Delta E_{binding}$<br>(kcal·mol <sup>-1</sup> ) | $K_d$    | $LE$<br>(kcal·mol <sup>-1</sup> ) | $BEI$<br>(kDa) | $LLE$ |
|------------------------|---------------------------------------------------|----------|-----------------------------------|----------------|-------|
| Isovaleric acid        | -4.6                                              | 4.25E-04 | 0.66                              | 33.01          | 2.25  |
| Tricyclene             | -5.8                                              | 5.61E-05 | 0.58                              | 31.20          | 1.56  |
| $\alpha$ -Thujene      | -6.1                                              | 3.38E-05 | 0.61                              | 32.82          | 1.47  |
| $\alpha$ -Pinene       | -5.6                                              | 7.87E-05 | 0.56                              | 30.13          | 1.11  |
| Camphene               | -5.8                                              | 5.61E-05 | 0.58                              | 31.20          | 1.25  |
| 3-Methyl valeric acid  | -5.1                                              | 1.83E-04 | 0.64                              | 32.18          | 2.23  |
| Sabinene               | -5.9                                              | 4.74E-05 | 0.59                              | 31.74          | 1.33  |
| 1-Octen-3-ol           | -4.5                                              | 5.04E-04 | 0.50                              | 25.72          | 1.18  |
| $\beta$ -Pinene        | -5.5                                              | 9.32E-05 | 0.55                              | 29.59          | 1.03  |
| Myrcene                | -5.5                                              | 9.32E-05 | 0.55                              | 29.59          | 0.56  |
| Limonene               | -6.2                                              | 2.86E-05 | 0.62                              | 33.35          | 1.23  |
| p-Cymene               | -6.1                                              | 3.38E-05 | 0.61                              | 33.31          | 1.35  |
| 1,8-Cineole            | -5.6                                              | 7.87E-05 | 0.51                              | 26.61          | 1.36  |
| Linalool               | -5.6                                              | 7.87E-05 | 0.51                              | 26.61          | 1.43  |
| Isopentyl isovalerate  | -5.5                                              | 9.32E-05 | 0.46                              | 23.40          | 1.41  |
| Camphor                | -6.0                                              | 4.01E-05 | 0.55                              | 28.88          | 2.00  |
| Menthone               | -6.0                                              | 4.01E-05 | 0.55                              | 28.51          | 1.75  |
| Isomenthone            | -6.0                                              | 4.01E-05 | 0.55                              | 28.51          | 1.75  |
| Borneol                | -5.7                                              | 6.65E-05 | 0.52                              | 27.08          | 1.98  |
| Neomenthol             | -6.0                                              | 4.01E-05 | 0.55                              | 28.14          | 1.96  |
| Menthol                | -5.9                                              | 4.74E-05 | 0.54                              | 27.67          | 1.88  |
| Carvone                | -6.4                                              | 2.04E-05 | 0.58                              | 31.22          | 2.20  |
| Menthyl acetate        | -6.1                                              | 3.38E-05 | 0.44                              | 22.54          | 1.46  |
| $\alpha$ -Cubebene     | -7.4                                              | 3.77E-06 | 0.49                              | 26.54          | 1.15  |
| Cyclosativene          | -7.5                                              | 3.19E-06 | 0.50                              | 26.90          | 1.54  |
| $\alpha$ -Copaene      | -6.6                                              | 1.46E-05 | 0.51                              | 27.44          | 1.20  |
| $\beta$ -Patchoulene   | -7.4                                              | 3.77E-06 | 0.49                              | 26.54          | 0.86  |
| $\beta$ -Bourbonene    | -7.4                                              | 3.77E-06 | 0.49                              | 26.54          | 1.15  |
| $\beta$ -Elemene       | -7.0                                              | 7.41E-06 | 0.47                              | 25.10          | 0.38  |
| $\beta$ -Caryophyllene | -7.3                                              | 4.47E-06 | 0.49                              | 25.92          | 0.54  |
| Seychellene            | -7.3                                              | 4.47E-06 | 0.49                              | 26.18          | 0.93  |
| $\alpha$ -Guaiene      | -7.7                                              | 2.27E-06 | 0.51                              | 27.61          | 0.92  |
| $\alpha$ -Humulene     | -7.3                                              | 4.47E-06 | 0.49                              | 26.18          | 0.31  |
| allo-Aromadendrene     | -7.6                                              | 2.69E-06 | 0.51                              | 27.26          | 1.30  |



|                              |      |          |      |       |      |
|------------------------------|------|----------|------|-------|------|
| $\alpha$ -Patchoulene        | -7.3 | 4.47E-06 | 0.49 | 26.18 | 0.93 |
| $\gamma$ -Muurolene          | -7.4 | 3.77E-06 | 0.49 | 26.54 | 0.84 |
| Germacrene-D                 | -7.5 | 3.19E-06 | 0.50 | 26.90 | 0.61 |
| Valencene                    | -7.4 | 3.77E-06 | 0.49 | 26.54 | 0.70 |
| Eremophyllene                | -7.8 | 1.92E-06 | 0.52 | 27.97 | 0.99 |
| $\gamma$ -Cadinene           | -7.5 | 3.19E-06 | 0.50 | 26.90 | 0.92 |
| 7-epi- $\alpha$ -Selinene    | -7.3 | 4.47E-06 | 0.49 | 26.18 | 0.62 |
| $\delta$ -Cadinene           | -7.4 | 3.77E-06 | 0.49 | 26.54 | 0.70 |
| Spathulenol                  | -7.2 | 5.29E-06 | 0.45 | 23.95 | 1.89 |
| $\beta$ -Caryophyllene oxide | -7.5 | 3.19E-06 | 0.47 | 24.94 | 1.56 |
| T-Cadinol                    | -7.3 | 4.47E-06 | 0.46 | 24.06 | 1.57 |
| $\delta$ -Cadinol            | -7.4 | 3.77E-06 | 0.46 | 24.39 | 1.65 |
| Patchoulol                   | -7.3 | 4.47E-06 | 0.46 | 24.06 | 1.74 |

---

**Table S3.** Complete results for essential oils from *Valeriana pilosa* with Catalase target: Intermolecular docking energy values ( $\Delta E_{binding}$ ),  $K_d$  values, Ligand Efficiency ( $LE$ ), Binding Efficiency Index ( $BEI$ ), and Lipophilic Ligand Efficiency ( $LLE$ )

| Compound               | $\Delta E_{binding}$<br>(kcal·mol <sup>-1</sup> ) | $K_d$    | $LE$<br>(kcal·mol <sup>-1</sup> ) | $BEI$<br>(kDa) | $LLE$ |
|------------------------|---------------------------------------------------|----------|-----------------------------------|----------------|-------|
| Isovaleric acid        | -3.7                                              | 1.94E-03 | 0.53                              | 26.55          | 1.59  |
| Tricyclene             | -5.1                                              | 1.83E-04 | 0.51                              | 27.44          | 1.05  |
| $\alpha$ -Thujene      | -4.8                                              | 3.04E-04 | 0.48                              | 25.82          | 0.52  |
| $\alpha$ -Pinene       | -5.0                                              | 2.17E-04 | 0.50                              | 26.90          | 0.67  |
| Camphene               | -5.0                                              | 2.17E-04 | 0.50                              | 26.90          | 0.67  |
| 3-Methyl valeric acid  | -4.2                                              | 8.35E-04 | 0.53                              | 26.50          | 1.57  |
| Sabinene               | -4.8                                              | 3.04E-04 | 0.48                              | 25.82          | 0.52  |
| 1-Octen-3-ol           | -4.1                                              | 9.89E-04 | 0.46                              | 23.44          | 0.89  |
| $\beta$ -Pinene        | -5.0                                              | 2.17E-04 | 0.50                              | 26.90          | 0.67  |
| Myrcene                | -4.7                                              | 3.59E-04 | 0.47                              | 25.28          | -0.03 |
| Limonene               | -4.8                                              | 3.04E-04 | 0.48                              | 25.82          | 0.21  |
| <i>p</i> -Cymene       | -4.8                                              | 3.04E-04 | 0.48                              | 26.21          | 0.40  |
| 1,8-Cineole            | -5.0                                              | 2.17E-04 | 0.45                              | 23.76          | 0.92  |
| Linalool               | -4.6                                              | 4.25E-04 | 0.42                              | 21.86          | 0.70  |
| Isopentyl isovalerate  | -4.2                                              | 8.35E-04 | 0.35                              | 17.87          | 0.46  |
| Camphor                | -5.3                                              | 1.31E-04 | 0.48                              | 25.51          | 1.48  |
| Menthone               | -5.1                                              | 1.83E-04 | 0.46                              | 24.23          | 1.09  |
| Isomenthone            | -5.1                                              | 1.83E-04 | 0.46                              | 24.23          | 1.09  |
| Borneol                | -5.2                                              | 1.55E-04 | 0.47                              | 24.71          | 1.62  |
| Neomenthol             | -4.9                                              | 2.56E-04 | 0.45                              | 22.98          | 1.15  |
| Menthol                | -4.8                                              | 3.04E-04 | 0.44                              | 22.51          | 1.08  |
| Carvone                | -5.0                                              | 2.17E-04 | 0.45                              | 24.39          | 1.18  |
| Menthyl acetate        | -5.2                                              | 1.55E-04 | 0.37                              | 19.22          | 0.80  |
| $\alpha$ -Cubebene     | -5.9                                              | 4.74E-05 | 0.39                              | 21.16          | 0.05  |
| Cyclosativene          | -6.2                                              | 2.86E-05 | 0.41                              | 22.24          | 0.58  |
| $\alpha$ -Copaene      | -6.0                                              | 4.01E-05 | 0.46                              | 24.94          | 0.76  |
| $\beta$ -Patchoulene   | -6.0                                              | 4.01E-05 | 0.40                              | 21.52          | -0.16 |
| $\beta$ -Bourbonene    | -6.5                                              | 1.72E-05 | 0.43                              | 23.31          | 0.49  |
| $\beta$ -Elemene       | -5.6                                              | 7.87E-05 | 0.37                              | 20.08          | -0.64 |
| $\beta$ -Caryophyllene | -6.1                                              | 3.38E-05 | 0.41                              | 21.66          | -0.33 |
| Seychellene            | -5.6                                              | 7.87E-05 | 0.37                              | 20.08          | -0.31 |
| $\alpha$ -Guaiene      | -6.4                                              | 2.04E-05 | 0.43                              | 22.95          | -0.03 |
| $\alpha$ -Humulene     | -6.4                                              | 2.04E-05 | 0.43                              | 22.95          | -0.35 |
| allo-Aromadendrene     | -6.2                                              | 2.86E-05 | 0.41                              | 22.24          | 0.27  |

|                              |      |          |      |       |       |
|------------------------------|------|----------|------|-------|-------|
| $\alpha$ -Patchoulene        | -6.1 | 3.38E-05 | 0.41 | 21.88 | 0.06  |
| $\gamma$ -Muurolene          | -6.2 | 2.86E-05 | 0.41 | 22.24 | -0.04 |
| Germacrene-D                 | -6.1 | 3.38E-05 | 0.41 | 21.88 | -0.42 |
| Valencene                    | -6.5 | 1.72E-05 | 0.43 | 23.31 | 0.04  |
| Eremophyllene                | -6.1 | 3.38E-05 | 0.41 | 21.88 | -0.25 |
| $\gamma$ -Cadinene           | -6.3 | 2.41E-05 | 0.42 | 22.59 | 0.04  |
| 7-epi- $\alpha$ -Selinene    | -6.3 | 2.41E-05 | 0.42 | 22.59 | -0.11 |
| $\delta$ -Cadinene           | -6.0 | 4.01E-05 | 0.40 | 21.52 | -0.33 |
| Spathulenol                  | -6.5 | 1.72E-05 | 0.41 | 21.62 | 1.38  |
| $\beta$ -Caryophyllene oxide | -6.5 | 1.72E-05 | 0.41 | 21.62 | 0.83  |
| T-Cadinol                    | -5.9 | 4.74E-05 | 0.37 | 19.45 | 0.55  |
| $\delta$ -Cadinol            | -5.9 | 4.74E-05 | 0.37 | 19.45 | 0.55  |
| Patchoulol                   | -5.9 | 4.74E-05 | 0.37 | 19.45 | 0.71  |

---

**Table S4.** Complete results for essential oils from *Valeriana pilosa* with Superoxide Dismutase target: Intermolecular docking energy values ( $\Delta E_{binding}$ ),  $K_d$  values, Ligand Efficiency ( $LEB$ ), binding Efficiency Index ( $BEI$ ), and Lipophilic Ligand Efficiency ( $LLE$ )

| Compound              | $\Delta E_{binding}$<br>(kcal·mol <sup>-1</sup> ) | $K_d$    | $LE$<br>(kcal·mol <sup>-1</sup> ) | $BEI$<br>(kDa) | $LLE$ |
|-----------------------|---------------------------------------------------|----------|-----------------------------------|----------------|-------|
| Isovaleric acid       | -3.5                                              | 2.72E-03 | 0.50                              | 25.12          | 1.45  |
| Tricyclene            | -3.7                                              | 1.94E-03 | 0.37                              | 19.90          | 0.02  |
| $\alpha$ -Thujene     | -4.1                                              | 9.89E-04 | 0.41                              | 22.06          | 0.01  |
| $\alpha$ -Pinene      | -3.8                                              | 1.64E-03 | 0.38                              | 20.44          | -0.21 |
| Camphene              | -3.8                                              | 1.64E-03 | 0.38                              | 20.44          | -0.21 |
| 3-Methyl valeric acid | -3.7                                              | 1.94E-03 | 0.46                              | 23.34          | 1.20  |
| Sabinene              | -4.1                                              | 9.89E-04 | 0.41                              | 22.06          | 0.01  |
| 1-Octen-3-ol          | -3.4                                              | 3.22E-03 | 0.38                              | 19.43          | 0.38  |
| $\beta$ -Pinene       | -3.8                                              | 1.64E-03 | 0.38                              | 20.44          | -0.21 |
| Myrcene               | -3.7                                              | 1.94E-03 | 0.37                              | 19.90          | -0.76 |
| Limonene              | -4.2                                              | 8.35E-04 | 0.42                              | 22.59          | -0.23 |
| p-Cymene              | -4.1                                              | 9.89E-04 | 0.41                              | 22.39          | -0.11 |
| 1,8-Cineole           | -3.8                                              | 1.64E-03 | 0.35                              | 18.05          | 0.04  |
| Linalool              | -3.9                                              | 1.39E-03 | 0.35                              | 18.53          | 0.19  |
| Isopentyl isovalerate | -3.9                                              | 1.39E-03 | 0.33                              | 16.59          | 0.24  |
| Camphor               | -3.8                                              | 1.64E-03 | 0.35                              | 18.29          | 0.38  |
| Menthone              | -4.2                                              | 8.35E-04 | 0.38                              | 19.96          | 0.43  |
| Isomenthone           | -4.2                                              | 8.35E-04 | 0.38                              | 19.96          | 0.43  |
| Borneol               | -3.8                                              | 1.64E-03 | 0.35                              | 18.05          | 0.59  |
| Neomenthol            | -4.2                                              | 8.35E-04 | 0.38                              | 19.70          | 0.64  |
| Menthol               | -4.3                                              | 7.06E-04 | 0.39                              | 20.17          | 0.71  |
| Carvone               | -4.7                                              | 3.59E-04 | 0.43                              | 22.93          | 0.96  |
| Menthyl acetate       | -4.6                                              | 4.25E-04 | 0.33                              | 17.00          | 0.36  |
| $\alpha$ -Cubebene    | -5.0                                              | 2.17E-04 | 0.33                              | 17.93          | -0.61 |
| Cyclosativene         | -4.8                                              | 3.04E-04 | 0.32                              | 17.21          | -0.44 |
| $\alpha$ -Copaene     | -4.5                                              | 5.04E-04 | 0.35                              | 18.71          | -0.34 |
| $\beta$ -Patchoulene  | -4.8                                              | 3.04E-04 | 0.32                              | 17.21          | -1.04 |

|                              |      |          |      |       |       |
|------------------------------|------|----------|------|-------|-------|
| $\beta$ -Bourbonene          | -5.2 | 1.55E-04 | 0.35 | 18.65 | -0.46 |
| $\beta$ -Elemene             | -4.6 | 4.25E-04 | 0.31 | 16.50 | -1.38 |
| $\beta$ -Caryophyllene       | -4.7 | 3.59E-04 | 0.31 | 16.69 | -1.36 |
| Seychellene                  | -4.7 | 3.59E-04 | 0.31 | 16.86 | -0.97 |
| $\alpha$ -Guaiene            | -5.5 | 9.32E-05 | 0.37 | 19.72 | -0.69 |
| $\alpha$ -Humulene           | -4.6 | 4.25E-04 | 0.31 | 16.50 | -1.66 |
| allo-Aromadendrene           | -4.8 | 3.04E-04 | 0.32 | 17.21 | -0.75 |
| $\alpha$ -Patchoulene        | -4.5 | 5.04E-04 | 0.30 | 16.14 | -1.12 |
| $\gamma$ -Muurolene          | -5.2 | 1.55E-04 | 0.35 | 18.65 | -0.77 |
| Germacrene-D                 | -4.9 | 2.56E-04 | 0.33 | 17.57 | -1.30 |
| Valencene                    | -5.0 | 2.17E-04 | 0.33 | 17.93 | -1.06 |
| Eremophyllene                | -5.1 | 1.83E-04 | 0.34 | 18.29 | -0.99 |
| $\gamma$ -Cadinene           | -4.8 | 3.04E-04 | 0.32 | 17.21 | -1.06 |
| 7-epi- $\alpha$ -Selinene    | -5.0 | 2.17E-04 | 0.33 | 17.93 | -1.06 |
| $\delta$ -Cadinene           | -5.5 | 9.32E-05 | 0.37 | 19.72 | -0.69 |
| Spathulenol                  | -5.5 | 9.32E-05 | 0.34 | 18.29 | 0.64  |
| $\beta$ -Caryophyllene oxide | -5.2 | 1.55E-04 | 0.33 | 17.29 | -0.13 |
| T-Cadinol                    | -4.8 | 3.04E-04 | 0.30 | 15.82 | -0.26 |
| $\delta$ -Cadinol            | -4.8 | 3.04E-04 | 0.30 | 15.82 | -0.26 |
| Patchoulol                   | -4.7 | 3.59E-04 | 0.29 | 15.49 | -0.17 |

---

**Table S5.** Complete results for essential oils from *Valeriana pilosa* with Xanthine Oxidase target: Intermolecular docking energy values ( $\Delta E_{binding}$ ),  $K_d$  values, Ligand Efficiency ( $LE$ ), Binding Efficiency Index ( $BEI$ ), and Lipophilic Ligand Efficiency ( $LLE$ )

| Compound              | $\Delta E_{binding}$<br>(kcal·mol <sup>-1</sup> ) | $K_d$    | $LE$<br>(kcal·mol <sup>-1</sup> ) | $BEI$ (kDa) | $LLE$ |
|-----------------------|---------------------------------------------------|----------|-----------------------------------|-------------|-------|
| Isovaleric acid       | -5.0                                              | 2.17E-04 | 0.71                              | 35.88       | 2.55  |
| Tricyclene            | -5.6                                              | 7.87E-05 | 0.56                              | 30.13       | 1.42  |
| $\alpha$ -Thujene     | -5.6                                              | 7.87E-05 | 0.56                              | 30.13       | 1.11  |
| $\alpha$ -Pinene      | -5.5                                              | 9.32E-05 | 0.55                              | 29.59       | 1.03  |
| Camphene              | -5.7                                              | 6.65E-05 | 0.57                              | 30.66       | 1.18  |
| 3-Methyl valeric acid | -5.3                                              | 1.31E-04 | 0.66                              | 33.44       | 2.38  |
| Sabinene              | -5.5                                              | 9.32E-05 | 0.55                              | 29.59       | 1.03  |
| 1-Octen-3-ol          | -5.4                                              | 1.10E-04 | 0.60                              | 30.87       | 1.84  |
| $\beta$ -Pinene       | -5.6                                              | 7.87E-05 | 0.56                              | 30.13       | 1.11  |
| Myrcene               | -6.1                                              | 3.38E-05 | 0.61                              | 32.82       | 1.00  |
| Limonene              | -6.7                                              | 1.23E-05 | 0.67                              | 36.04       | 1.60  |
| p-Cymene              | -7.0                                              | 7.41E-06 | 0.70                              | 38.22       | 2.01  |
| 1,8-Cineole           | -5.7                                              | 6.65E-05 | 0.52                              | 27.08       | 1.43  |
| Linalool              | -6.0                                              | 4.01E-05 | 0.55                              | 28.51       | 1.73  |
| Isopentyl isovalerate | -5.6                                              | 7.87E-05 | 0.47                              | 23.82       | 1.48  |
| Camphor               | -6.1                                              | 3.38E-05 | 0.55                              | 29.37       | 2.07  |
| Menthone              | -6.1                                              | 3.38E-05 | 0.55                              | 28.98       | 1.82  |
| Isomenthone           | -6.1                                              | 3.38E-05 | 0.55                              | 28.98       | 1.82  |
| Borneol               | -6.0                                              | 4.01E-05 | 0.55                              | 28.51       | 2.20  |
| Neomenthol            | -6.1                                              | 3.38E-05 | 0.55                              | 28.61       | 2.03  |
| Menthol               | -5.9                                              | 4.74E-05 | 0.54                              | 27.67       | 1.88  |
| Carvone               | -7.2                                              | 5.29E-06 | 0.65                              | 35.13       | 2.79  |
| Menthyl acetate       | -6.6                                              | 1.46E-05 | 0.47                              | 24.39       | 1.83  |
| $\alpha$ -Cubebene    | -7.0                                              | 7.41E-06 | 0.47                              | 25.10       | 0.86  |
| Cyclosativene         | -7.0                                              | 7.41E-06 | 0.47                              | 25.10       | 1.17  |
| $\alpha$ -Copaene     | -6.6                                              | 1.46E-05 | 0.51                              | 27.44       | 1.20  |

|                              |      |          |      |       |       |
|------------------------------|------|----------|------|-------|-------|
| $\beta$ -Patchoulene         | -6.6 | 1.46E-05 | 0.44 | 23.67 | 0.28  |
| $\beta$ -Bourbonene          | -6.6 | 1.46E-05 | 0.44 | 23.67 | 0.57  |
| $\beta$ -Elemene             | -6.5 | 1.72E-05 | 0.43 | 23.31 | 0.02  |
| $\beta$ -Caryophyllene       | -6.1 | 3.38E-05 | 0.41 | 21.66 | -0.33 |
| Seychellene                  | -6.8 | 1.04E-05 | 0.45 | 24.39 | 0.57  |
| $\alpha$ -Guaiene            | -7.0 | 7.41E-06 | 0.47 | 25.10 | 0.40  |
| $\alpha$ -Humulene           | -6.5 | 1.72E-05 | 0.43 | 23.31 | -0.27 |
| allo-Aromadendrene           | -7.0 | 7.41E-06 | 0.47 | 25.10 | 0.86  |
| $\alpha$ -Patchoulene        | -6.2 | 2.86E-05 | 0.41 | 22.24 | 0.13  |
| $\gamma$ -Muurolene          | -6.9 | 8.77E-06 | 0.46 | 24.75 | 0.48  |
| Germacrene-D                 | -6.8 | 1.04E-05 | 0.45 | 24.39 | 0.09  |
| Valencene                    | -7.3 | 4.47E-06 | 0.49 | 26.18 | 0.62  |
| Eremophyllene                | -7.6 | 2.69E-06 | 0.51 | 27.26 | 0.84  |
| $\gamma$ -Cadinene           | -6.8 | 1.04E-05 | 0.45 | 24.39 | 0.40  |
| 7-epi- $\alpha$ -Selinene    | -7.1 | 6.26E-06 | 0.47 | 25.46 | 0.48  |
| $\delta$ -Cadinene           | -6.5 | 1.72E-05 | 0.43 | 23.31 | 0.04  |
| Spathulenol                  | -6.1 | 3.38E-05 | 0.38 | 20.29 | 1.08  |
| $\beta$ -Caryophyllene oxide | -6.5 | 1.72E-05 | 0.41 | 21.62 | 0.83  |
| T-Cadinol                    | -6.3 | 2.41E-05 | 0.39 | 20.76 | 0.84  |
| $\delta$ -Cadinol            | -6.3 | 2.41E-05 | 0.39 | 20.76 | 0.84  |
| Patchoulol                   | -7.0 | 7.41E-06 | 0.44 | 23.07 | 1.52  |

**Table S6.** .mol2 files for all compounds studied in this work.

| Compound 1                                                                                                                                                                                                                                                                                                                                                                                                                                                                                                                                                                                                                                                                                                                                                                                                                                                                                                                                                                                                                                                                                                                                                                     |  |  |  |  |  |  |  |  |  |
|--------------------------------------------------------------------------------------------------------------------------------------------------------------------------------------------------------------------------------------------------------------------------------------------------------------------------------------------------------------------------------------------------------------------------------------------------------------------------------------------------------------------------------------------------------------------------------------------------------------------------------------------------------------------------------------------------------------------------------------------------------------------------------------------------------------------------------------------------------------------------------------------------------------------------------------------------------------------------------------------------------------------------------------------------------------------------------------------------------------------------------------------------------------------------------|--|--|--|--|--|--|--|--|--|
| @<TRIPOS>MOLECULE<br>compuesto_1.out<br>17 16 0 0 0<br>SMALL<br>MULLIKEN_CHARGES<br><br>@@<TRIPOS>ATOM<br>1 C -11.9915 0.7844 0.2482 C.3 1 UNL1 -0.5082<br>2 C -10.7395 -0.1045 0.3425 C.3 1 UNL1 0.0630<br>3 C -9.4784 0.7163 -0.0274 C.3 1 UNL1 -0.4278<br>4 C -8.1768 -0.0237 0.1933 C.2 1 UNL1 0.6395<br>5 O -7.1808 0.5141 -0.5653 O.3 1 UNL1 -0.5153<br>6 C -10.8939 -1.3344 -0.5708 C.3 1 UNL1 -0.5064<br>7 O -7.9583 -0.9609 0.9228 O.2 1 UNL1 -0.5200<br>8 H -11.9483 1.6438 0.9599 H 1 UNL1 0.1533<br>9 H -12.1443 1.1612 -0.7794 H 1 UNL1 0.1557<br>10 H -12.9034 0.2139 0.5123 H 1 UNL1 0.1577<br>11 H -10.6382 -0.4536 1.3980 H 1 UNL1 0.1265<br>12 H -9.5728 1.0315 -1.0862 H 1 UNL1 0.1896<br>13 H -9.4255 1.6480 0.5912 H 1 UNL1 0.1859<br>14 H -6.3578 0.0111 -0.3942 H 1 UNL1 0.3337<br>15 H -11.7979 -1.9264 -0.2844 H 1 UNL1 0.1583<br>16 H -11.0005 -1.0392 -1.6312 H 1 UNL1 0.1516<br>17 H -10.0080 -1.9956 -0.5194 H 1 UNL1 0.1628<br><br>@@<TRIPOS>BOND<br>1 16 6 1<br>2 12 3 1<br>3 9 1 1<br>4 6 17 1<br>5 6 15 1<br>6 6 2 1<br>7 5 14 1<br>8 5 4 1<br>9 3 4 1<br>10 3 2 1<br>11 3 13 1<br>12 4 7 2<br>13 1 2 1<br>14 1 10 1<br>15 1 8 1<br>16 2 11 1 |  |  |  |  |  |  |  |  |  |
| Compound 2                                                                                                                                                                                                                                                                                                                                                                                                                                                                                                                                                                                                                                                                                                                                                                                                                                                                                                                                                                                                                                                                                                                                                                     |  |  |  |  |  |  |  |  |  |
| @<TRIPOS>MOLECULE<br>compuesto_2.out<br>26 28 0 0 0<br>SMALL<br>MULLIKEN_CHARGES<br><br>@@<TRIPOS>ATOM<br>1 C -10.1093 0.8568 0.4249 C.3 1 UNL1 -0.1864<br>2 C -10.5753 -0.5750 0.1219 C.3 1 UNL1 -0.2730<br>3 C -9.3919 -0.9748 -0.8188 C.3 1 UNL1 -0.1189<br>4 C -8.1257 -0.6046 0.0610 C.3 1 UNL1 0.1815<br>5 C -8.5666 0.8584 0.3809 C.3 1 UNL1 0.0104<br>6 C -9.3773 1.3508 -0.8388 C.3 1 UNL1 -0.1862<br>7 C -9.4367 0.1966 -1.8517 C.3 1 UNL1 -0.2726<br>8 C -7.7263 1.7576 1.2218 C.3 1 UNL1 -0.4703<br>9 C -6.8189 -0.6776 -0.7293 C.3 1 UNL1 -0.5159<br>10 C -8.0014 -1.4769 1.3113 C.3 1 UNL1 -0.5161<br>11 H -10.6946 1.4837 1.0734 H 1 UNL1 0.1445                                                                                                                                                                                                                                                                                                                                                                                                                                                                                                                |  |  |  |  |  |  |  |  |  |



|                   |          |         |             |        |         |
|-------------------|----------|---------|-------------|--------|---------|
| 12 H              | -10.6469 | -1.2042 | 1.0172 H    | 1 UNL1 | 0.1352  |
| 13 H              | -11.5514 | -0.6040 | -0.3801 H   | 1 UNL1 | 0.1347  |
| 14 H              | -9.4122  | -1.9831 | -1.2236 H   | 1 UNL1 | 0.1242  |
| 15 H              | -9.3854  | 2.3678  | -1.1855 H   | 1 UNL1 | 0.1443  |
| 16 H              | -10.3622 | 0.2056  | -2.4432 H   | 1 UNL1 | 0.1347  |
| 17 H              | -8.5993  | 0.1924  | -2.5599 H   | 1 UNL1 | 0.1351  |
| 18 H              | -7.5566  | 1.3299  | 2.2177 H    | 1 UNL1 | 0.1574  |
| 19 H              | -6.7411  | 1.9254  | 0.7694 H    | 1 UNL1 | 0.1571  |
| 20 H              | -8.1921  | 2.7408  | 1.3604 H    | 1 UNL1 | 0.1528  |
| 21 H              | -6.7844  | 0.0598  | -1.5396 H   | 1 UNL1 | 0.1585  |
| 22 H              | -5.9554  | -0.4826 | -0.0846 H   | 1 UNL1 | 0.1530  |
| 23 H              | -6.6853  | -1.6703 | -1.1713 H   | 1 UNL1 | 0.1523  |
| 24 H              | -8.8290  | -1.3156 | 2.0112 H    | 1 UNL1 | 0.1585  |
| 25 H              | -7.9886  | -2.5404 | 1.0522 H    | 1 UNL1 | 0.1520  |
| 26 H              | -7.0718  | -1.2597 | 1.8491 H    | 1 UNL1 | 0.1532  |
| @<TRIPOS>BOND     |          |         |             |        |         |
| 1                 | 17       | 7       | 1           |        |         |
| 2                 | 16       | 7       | 1           |        |         |
| 3                 | 7        | 6       | 1           |        |         |
| 4                 | 7        | 3       | 1           |        |         |
| 5                 | 21       | 9       | 1           |        |         |
| 6                 | 14       | 3       | 1           |        |         |
| 7                 | 15       | 6       | 1           |        |         |
| 8                 | 23       | 9       | 1           |        |         |
| 9                 | 6        | 5       | 1           |        |         |
| 10                | 6        | 1       | 1           |        |         |
| 11                | 3        | 4       | 1           |        |         |
| 12                | 3        | 2       | 1           |        |         |
| 13                | 9        | 22      | 1           |        |         |
| 14                | 9        | 4       | 1           |        |         |
| 15                | 13       | 2       | 1           |        |         |
| 16                | 4        | 5       | 1           |        |         |
| 17                | 4        | 10      | 1           |        |         |
| 18                | 2        | 1       | 1           |        |         |
| 19                | 2        | 12      | 1           |        |         |
| 20                | 5        | 1       | 1           |        |         |
| 21                | 5        | 8       | 1           |        |         |
| 22                | 1        | 11      | 1           |        |         |
| 23                | 19       | 8       | 1           |        |         |
| 24                | 25       | 10      | 1           |        |         |
| 25                | 8        | 20      | 1           |        |         |
| 26                | 8        | 18      | 1           |        |         |
| 27                | 10       | 26      | 1           |        |         |
| 28                | 10       | 24      | 1           |        |         |
| Compound 3        |          |         |             |        |         |
| @<TRIPOS>MOLECULE |          |         |             |        |         |
| compuesto_3.out   |          |         |             |        |         |
| 26 27 0 0 0       |          |         |             |        |         |
| SMALL             |          |         |             |        |         |
| MULLIKEN_CHARGES  |          |         |             |        |         |
| @<TRIPOS>ATOM     |          |         |             |        |         |
| 1 C               | -8.6021  | 0.3558  | -5.4823 C.3 | 1 UNL1 | 0.0319  |
| 2 C               | -8.0494  | -1.0659 | -5.2292 C.3 | 1 UNL1 | -0.2026 |
| 3 C               | -8.7184  | -0.2830 | -4.1032 C.3 | 1 UNL1 | -0.3555 |
| 4 C               | -9.8269  | 0.1762  | -6.4004 C.3 | 1 UNL1 | -0.2675 |
| 5 C               | -9.9559  | -1.3235 | -6.5783 C.2 | 1 UNL1 | -0.2511 |
| 6 C               | -8.9726  | -2.0031 | -5.9569 C.2 | 1 UNL1 | 0.0926  |
| 7 C               | -8.7793  | -3.4700 | -5.8888 C.3 | 1 UNL1 | -0.4903 |
| 8 C               | -7.7553  | 1.6014  | -5.7079 C.3 | 1 UNL1 | -0.0004 |
| 9 C               | -8.5069  | 2.8192  | -5.1573 C.3 | 1 UNL1 | -0.4893 |
| 10 C              | -6.3653  | 1.5076  | -5.0642 C.3 | 1 UNL1 | -0.4909 |
| 11 H              | -6.9963  | -1.3109 | -5.1913 H   | 1 UNL1 | 0.1538  |
| 12 H              | -9.6919  | -0.6071 | -3.7417 H   | 1 UNL1 | 0.1605  |
| 13 H              | -8.1106  | 0.0941  | -3.2871 H   | 1 UNL1 | 0.1540  |

|                   |          |         |             |        |         |
|-------------------|----------|---------|-------------|--------|---------|
| 14 H              | -10.7379 | 0.6105  | -5.9536 H   | 1 UNL1 | 0.1455  |
| 15 H              | -9.6766  | 0.6768  | -7.3718 H   | 1 UNL1 | 0.1438  |
| 16 H              | -10.7763 | -1.7340 | -7.1370 H   | 1 UNL1 | 0.1486  |
| 17 H              | -9.5657  | -4.0209 | -6.4228 H   | 1 UNL1 | 0.1603  |
| 18 H              | -7.8178  | -3.7783 | -6.3200 H   | 1 UNL1 | 0.1644  |
| 19 H              | -8.7946  | -3.8198 | -4.8417 H   | 1 UNL1 | 0.1671  |
| 20 H              | -7.6154  | 1.7263  | -6.8137 H   | 1 UNL1 | 0.1207  |
| 21 H              | -7.9455  | 3.7437  | -5.3231 H   | 1 UNL1 | 0.1476  |
| 22 H              | -9.4890  | 2.9353  | -5.6267 H   | 1 UNL1 | 0.1492  |
| 23 H              | -8.6730  | 2.7246  | -4.0774 H   | 1 UNL1 | 0.1550  |
| 24 H              | -5.7898  | 2.4246  | -5.2405 H   | 1 UNL1 | 0.1495  |
| 25 H              | -6.4303  | 1.3664  | -3.9791 H   | 1 UNL1 | 0.1527  |
| 26 H              | -5.7816  | 0.6745  | -5.4680 H   | 1 UNL1 | 0.1503  |
| @<TRIPOS>BOND     |          |         |             |        |         |
| 1                 | 15       | 4       | 1           |        |         |
| 2                 | 16       | 5       | 1           |        |         |
| 3                 | 20       | 8       | 1           |        |         |
| 4                 | 5        | 4       | 1           |        |         |
| 5                 | 5        | 6       | 2           |        |         |
| 6                 | 17       | 7       | 1           |        |         |
| 7                 | 4        | 14      | 1           |        |         |
| 8                 | 4        | 1       | 1           |        |         |
| 9                 | 18       | 7       | 1           |        |         |
| 10                | 6        | 7       | 1           |        |         |
| 11                | 6        | 2       | 1           |        |         |
| 12                | 7        | 19      | 1           |        |         |
| 13                | 8        | 1       | 1           |        |         |
| 14                | 8        | 9       | 1           |        |         |
| 15                | 8        | 10      | 1           |        |         |
| 16                | 22       | 9       | 1           |        |         |
| 17                | 1        | 2       | 1           |        |         |
| 18                | 1        | 3       | 1           |        |         |
| 19                | 26       | 10      | 1           |        |         |
| 20                | 21       | 9       | 1           |        |         |
| 21                | 24       | 10      | 1           |        |         |
| 22                | 2        | 11      | 1           |        |         |
| 23                | 2        | 3       | 1           |        |         |
| 24                | 9        | 23      | 1           |        |         |
| 25                | 10       | 25      | 1           |        |         |
| 26                | 3        | 12      | 1           |        |         |
| 27                | 3        | 13      | 1           |        |         |
| Compound 4        |          |         |             |        |         |
| @<TRIPOS>MOLECULE |          |         |             |        |         |
| compuesto_4.out   |          |         |             |        |         |
| 26 27 0 0 0       |          |         |             |        |         |
| SMALL             |          |         |             |        |         |
| MULLIKEN_CHARGES  |          |         |             |        |         |
| @<TRIPOS>ATOM     |          |         |             |        |         |
| 1 C               | -10.1088 | 0.8924  | -5.9739 C.3 | 1 UNL1 | -0.1658 |
| 2 C               | -10.3430 | -0.5394 | -6.6127 C.3 | 1 UNL1 | 0.1866  |
| 3 C               | -9.7164  | -1.0831 | -5.2653 C.3 | 1 UNL1 | -0.1235 |
| 4 C               | -8.1766  | -1.0078 | -5.3088 C.3 | 1 UNL1 | -0.2545 |
| 5 C               | -7.7292  | 0.3434  | -5.8245 C.2 | 1 UNL1 | -0.2406 |
| 6 C               | -8.6499  | 1.2731  | -6.1472 C.2 | 1 UNL1 | 0.0767  |
| 7 C               | -10.2343 | 0.2148  | -4.5709 C.3 | 1 UNL1 | -0.3041 |
| 8 C               | -11.8284 | -0.8898 | -6.7259 C.3 | 1 UNL1 | -0.5242 |
| 9 C               | -9.6353  | -0.8699 | -7.9177 C.3 | 1 UNL1 | -0.5175 |
| 10 C              | -8.3444  | 2.6356  | -6.6623 C.3 | 1 UNL1 | -0.4981 |
| 11 H              | -10.8268 | 1.6743  | -6.2270 H   | 1 UNL1 | 0.1324  |
| 12 H              | -10.0925 | -2.0403 | -4.8989 H   | 1 UNL1 | 0.1219  |
| 13 H              | -7.7625  | -1.1735 | -4.2946 H   | 1 UNL1 | 0.1358  |
| 14 H              | -7.7649  | -1.8164 | -5.9393 H   | 1 UNL1 | 0.1354  |
| 15 H              | -6.6618  | 0.4867  | -5.9166 H   | 1 UNL1 | 0.1414  |
| 16 H              | -9.5999  | 0.6335  | -3.7867 H   | 1 UNL1 | 0.1425  |

|                   |          |         |             |        |         |
|-------------------|----------|---------|-------------|--------|---------|
| 17 H              | -11.2570 | 0.1518  | -4.1899 H   | 1 UNL1 | 0.1324  |
| 18 H              | -12.4292 | -0.4162 | -5.9419 H   | 1 UNL1 | 0.1552  |
| 19 H              | -12.2455 | -0.5616 | -7.6843 H   | 1 UNL1 | 0.1545  |
| 20 H              | -11.9757 | -1.9728 | -6.6538 H   | 1 UNL1 | 0.1557  |
| 21 H              | -9.0985  | -1.8221 | -7.8456 H   | 1 UNL1 | 0.1564  |
| 22 H              | -10.3291 | -0.9480 | -8.7613 H   | 1 UNL1 | 0.1506  |
| 23 H              | -8.9040  | -0.1035 | -8.1965 H   | 1 UNL1 | 0.1654  |
| 24 H              | -7.3166  | 2.7276  | -7.0361 H   | 1 UNL1 | 0.1592  |
| 25 H              | -9.0231  | 2.9150  | -7.4796 H   | 1 UNL1 | 0.1618  |
| 26 H              | -8.4729  | 3.3893  | -5.8724 H   | 1 UNL1 | 0.1644  |
| @<TRIPOS>BOND     |          |         |             |        |         |
| 1                 | 22       | 9       | 1           |        |         |
| 2                 | 23       | 9       | 1           |        |         |
| 3                 | 9        | 21      | 1           |        |         |
| 4                 | 9        | 2       | 1           |        |         |
| 5                 | 19       | 8       | 1           |        |         |
| 6                 | 25       | 10      | 1           |        |         |
| 7                 | 24       | 10      | 1           |        |         |
| 8                 | 8        | 20      | 1           |        |         |
| 9                 | 8        | 2       | 1           |        |         |
| 10                | 8        | 18      | 1           |        |         |
| 11                | 10       | 6       | 1           |        |         |
| 12                | 10       | 26      | 1           |        |         |
| 13                | 2        | 1       | 1           |        |         |
| 14                | 2        | 3       | 1           |        |         |
| 15                | 11       | 1       | 1           |        |         |
| 16                | 6        | 1       | 1           |        |         |
| 17                | 6        | 5       | 2           |        |         |
| 18                | 1        | 7       | 1           |        |         |
| 19                | 14       | 4       | 1           |        |         |
| 20                | 15       | 5       | 1           |        |         |
| 21                | 5        | 4       | 1           |        |         |
| 22                | 4        | 3       | 1           |        |         |
| 23                | 4        | 13      | 1           |        |         |
| 24                | 3        | 12      | 1           |        |         |
| 25                | 3        | 7       | 1           |        |         |
| 26                | 7        | 17      | 1           |        |         |
| 27                | 7        | 16      | 1           |        |         |
| Compound 5        |          |         |             |        |         |
| @<TRIPOS>MOLECULE |          |         |             |        |         |
| compuesto_5.out   |          |         |             |        |         |
| 26 27 0 0 0       |          |         |             |        |         |
| SMALL             |          |         |             |        |         |
| MULLIKEN_CHARGES  |          |         |             |        |         |
| @<TRIPOS>ATOM     |          |         |             |        |         |
| 1 C               | -9.2218  | -0.0323 | -7.1842 C.3 | 1 UNL1 | -0.2753 |
| 2 C               | -9.5794  | -0.4504 | -5.7329 C.3 | 1 UNL1 | -0.1015 |
| 3 C               | -8.2625  | -0.8132 | -4.9451 C.3 | 1 UNL1 | 0.1549  |
| 4 C               | -7.5910  | 0.5695  | -4.8322 C.2 | 1 UNL1 | 0.0488  |
| 5 C               | -8.4978  | 1.3314  | -7.0003 C.3 | 1 UNL1 | -0.2668 |
| 6 C               | -8.5582  | 1.5680  | -5.4613 C.3 | 1 UNL1 | -0.0927 |
| 7 C               | -9.9351  | 0.9320  | -5.1073 C.3 | 1 UNL1 | -0.3052 |
| 8 C               | -8.6299  | -1.3371 | -3.5480 C.3 | 1 UNL1 | -0.5113 |
| 9 C               | -7.3848  | -1.8339 | -5.6800 C.3 | 1 UNL1 | -0.5075 |
| 10 C              | -6.4134  | 0.8478  | -4.2826 C.2 | 1 UNL1 | -0.4329 |
| 11 H              | -8.5758  | -0.7625 | -7.6900 H   | 1 UNL1 | 0.1336  |
| 12 H              | -10.1276 | 0.0653  | -7.8015 H   | 1 UNL1 | 0.1276  |
| 13 H              | -10.3509 | -1.2231 | -5.6618 H   | 1 UNL1 | 0.1215  |
| 14 H              | -9.0037  | 2.1414  | -7.5445 H   | 1 UNL1 | 0.1286  |
| 15 H              | -7.4577  | 1.2862  | -7.3589 H   | 1 UNL1 | 0.1343  |
| 16 H              | -8.4194  | 2.6109  | -5.1560 H   | 1 UNL1 | 0.1271  |
| 17 H              | -10.1475 | 0.8923  | -4.0339 H   | 1 UNL1 | 0.1362  |
| 18 H              | -10.7805 | 1.4360  | -5.5888 H   | 1 UNL1 | 0.1371  |
| 19 H              | -9.0988  | -0.5567 | -2.9347 H   | 1 UNL1 | 0.1568  |

|                   |         |         |             |        |         |
|-------------------|---------|---------|-------------|--------|---------|
| 20 H              | -9.3324 | -2.1719 | -3.6252 H   | 1 UNL1 | 0.1521  |
| 21 H              | -7.7485 | -1.6908 | -3.0009 H   | 1 UNL1 | 0.1554  |
| 22 H              | -6.7190 | -1.3450 | -6.4064 H   | 1 UNL1 | 0.1590  |
| 23 H              | -6.7434 | -2.3867 | -4.9844 H   | 1 UNL1 | 0.1537  |
| 24 H              | -7.9890 | -2.5725 | -6.2218 H   | 1 UNL1 | 0.1530  |
| 25 H              | -5.9955 | 1.8392  | -4.2277 H   | 1 UNL1 | 0.1554  |
| 26 H              | -5.7694 | 0.0925  | -3.8512 H   | 1 UNL1 | 0.1581  |
| @<TRIPOS>BOND     |         |         |             |        |         |
| 1                 | 12      | 1       | 1           |        |         |
| 2                 | 11      | 1       | 1           |        |         |
| 3                 | 14      | 5       | 1           |        |         |
| 4                 | 15      | 5       | 1           |        |         |
| 5                 | 1       | 5       | 1           |        |         |
| 6                 | 1       | 2       | 1           |        |         |
| 7                 | 5       | 6       | 1           |        |         |
| 8                 | 22      | 9       | 1           |        |         |
| 9                 | 24      | 9       | 1           |        |         |
| 10                | 2       | 13      | 1           |        |         |
| 11                | 2       | 7       | 1           |        |         |
| 12                | 2       | 3       | 1           |        |         |
| 13                | 9       | 23      | 1           |        |         |
| 14                | 9       | 3       | 1           |        |         |
| 15                | 18      | 7       | 1           |        |         |
| 16                | 6       | 16      | 1           |        |         |
| 17                | 6       | 7       | 1           |        |         |
| 18                | 6       | 4       | 1           |        |         |
| 19                | 7       | 17      | 1           |        |         |
| 20                | 3       | 4       | 1           |        |         |
| 21                | 3       | 8       | 1           |        |         |
| 22                | 4       | 10      | 2           |        |         |
| 23                | 10      | 25      | 1           |        |         |
| 24                | 10      | 26      | 1           |        |         |
| 25                | 20      | 8       | 1           |        |         |
| 26                | 8       | 21      | 1           |        |         |
| 27                | 8       | 19      | 1           |        |         |
| Compound 6        |         |         |             |        |         |
| @<TRIPOS>MOLECULE |         |         |             |        |         |
| compuesto_6.out   |         |         |             |        |         |
| 20 19 0 0 0       |         |         |             |        |         |
| SMALL             |         |         |             |        |         |
| MULLIKEN_CHARGES  |         |         |             |        |         |
| @<TRIPOS>ATOM     |         |         |             |        |         |
| 1 C               | -6.8697 | 0.7602  | -8.9193 C.3 | 1 UNL1 | -0.2665 |
| 2 C               | -6.2783 | -0.1072 | -7.7830 C.3 | 1 UNL1 | 0.0216  |
| 3 C               | -5.2969 | 0.7401  | -6.9274 C.3 | 1 UNL1 | -0.4310 |
| 4 C               | -4.8102 | 0.0533  | -5.6780 C.2 | 1 UNL1 | 0.6417  |
| 5 O               | -3.6247 | 0.5788  | -5.2592 O.3 | 1 UNL1 | -0.5155 |
| 6 C               | -5.5720 | -1.3590 | -8.3258 C.3 | 1 UNL1 | -0.4962 |
| 7 O               | -5.3403 | -0.8414 | -5.0554 O.2 | 1 UNL1 | -0.5218 |
| 8 C               | -7.9589 | 0.0555  | -9.7322 C.3 | 1 UNL1 | -0.4490 |
| 9 H               | -7.3110 | 1.6822  | -8.4841 H   | 1 UNL1 | 0.1298  |
| 10 H              | -6.0451 | 1.1009  | -9.5804 H   | 1 UNL1 | 0.1337  |
| 11 H              | -7.1221 | -0.4252 | -7.1221 H   | 1 UNL1 | 0.1320  |
| 12 H              | -4.4338 | 1.0281  | -7.5664 H   | 1 UNL1 | 0.1898  |
| 13 H              | -5.7759 | 1.6814  | -6.5966 H   | 1 UNL1 | 0.1833  |
| 14 H              | -3.3475 | 0.1058  | -4.4421 H   | 1 UNL1 | 0.3355  |
| 15 H              | -5.1221 | -1.9490 | -7.5235 H   | 1 UNL1 | 0.1586  |
| 16 H              | -6.2824 | -2.0330 | -8.8377 H   | 1 UNL1 | 0.1582  |
| 17 H              | -4.7685 | -1.0678 | -9.0382 H   | 1 UNL1 | 0.1524  |
| 18 H              | -7.5628 | -0.7973 | -10.3124 H  | 1 UNL1 | 0.1493  |
| 19 H              | -8.7680 | -0.3188 | -9.0780 H   | 1 UNL1 | 0.1494  |
| 20 H              | -8.4099 | 0.7550  | -10.4571 H  | 1 UNL1 | 0.1447  |
| @<TRIPOS>BOND     |         |         |             |        |         |
| 1                 | 20      | 8       | 1           |        |         |

```

2 18 8 1
3 8 19 1
4 8 1 1
5 10 1 1
6 17 6 1
7 1 9 1
8 1 2 1
9 16 6 1
10 6 2 1
11 6 15 1
12 2 11 1
13 2 3 1
14 12 3 1
15 3 13 1
16 3 4 1
17 4 5 1
18 4 7 2
19 5 14 1

```

### Compound 7

```

@<TRIPOS>MOLECULE
compuesto_7.out
26 27 0 0 0
SMALL
MULLIKEN_CHARGES

```

```

@<TRIPOS>ATOM
 1 C      -7.2629  0.2711 -9.1354 C.3  1 UNL1  0.0352
 2 C      -6.8701 -1.1366 -8.6363 C.3  1 UNL1 -0.2148
 3 C      -7.8943 -0.3015 -7.8769 C.3  1 UNL1 -0.3478
 4 C      -8.0658  0.0888 -10.4293 C.3  1 UNL1 -0.2722
 5 C      -8.3819 -1.4228 -10.5351 C.3  1 UNL1 -0.3072
 6 C      -7.4076 -2.1314 -9.6125 C.2  1 UNL1  0.1536
 7 C      -7.0500 -3.4106 -9.6941 C.2  1 UNL1 -0.4658
 8 C      -6.3870  1.5158 -9.0840 C.3  1 UNL1 -0.0018
 9 C      -7.2640  2.7545 -8.8527 C.3  1 UNL1 -0.4886
10 C      -5.2980  1.4174 -8.0084 C.3  1 UNL1 -0.4919
11 H      -5.9069 -1.3455 -8.1785 H  1 UNL1  0.1591
12 H      -8.9407 -0.5954 -7.8757 H  1 UNL1  0.1594
13 H      -7.6180  0.1106 -6.9124 H  1 UNL1  0.1555
14 H      -8.9716  0.7133 -10.4261 H  1 UNL1  0.1386
15 H      -7.4678  0.4136 -11.2995 H  1 UNL1  0.1393
16 H      -8.2912 -1.7781 -11.5749 H  1 UNL1  0.1471
17 H      -9.4179 -1.6388 -10.2064 H  1 UNL1  0.1502
18 H      -6.3600 -3.8787 -9.0115 H  1 UNL1  0.1634
19 H      -7.4201 -4.0886 -10.4445 H  1 UNL1  0.1607
20 H      -5.8754  1.6210 -10.0782 H  1 UNL1  0.1206
21 H      -6.6681  3.6731 -8.8338 H  1 UNL1  0.1488
22 H      -8.0113  2.8690 -9.6447 H  1 UNL1  0.1483
23 H      -7.8063  2.6900 -7.9018 H  1 UNL1  0.1553
24 H      -4.6882  2.3261 -7.9767 H  1 UNL1  0.1502
25 H      -5.7267  1.2807 -7.0095 H  1 UNL1  0.1532
26 H      -4.6222  0.5760 -8.1968 H  1 UNL1  0.1517

```

```

@<TRIPOS>BOND
 1 16 5 1
 2 15 4 1
 3 5 4 1
 4 5 17 1
 5 5 6 1
 6 19 7 1
 7 4 14 1
 8 4 1 1
 9 20 8 1
10 7 6 2
11 7 18 1
12 22 9 1

```

```

13 6 2 1
14 1 8 1
15 1 2 1
16 1 3 1
17 8 9 1
18 8 10 1
19 9 21 1
20 9 23 1
21 2 11 1
22 2 3 1
23 26 10 1
24 10 24 1
25 10 25 1
26 3 12 1
27 3 13 1

```

## Compound 8

@<TRIPOS>MOLECULE

compuesto\_8.out

25 24 0 0 0

SMALL

MULLIKEN\_CHARGES

@<TRIPOS>ATOM

|      |          |         |              |        |         |
|------|----------|---------|--------------|--------|---------|
| 1 O  | -9.4109  | 0.9451  | -12.0316 O.3 | 1 UNL1 | -0.5625 |
| 2 H  | -3.8677  | 1.0715  | -6.7700 H    | 1 UNL1 | 0.1470  |
| 3 H  | -5.1830  | 1.7052  | -5.7575 H    | 1 UNL1 | 0.1475  |
| 4 H  | -6.6122  | -0.2993 | -6.3315 H    | 1 UNL1 | 0.1265  |
| 5 H  | -5.3062  | -0.9461 | -7.3674 H    | 1 UNL1 | 0.1269  |
| 6 H  | -6.7630  | 1.7504  | -7.7971 H    | 1 UNL1 | 0.1351  |
| 7 H  | -5.4579  | 1.1033  | -8.8337 H    | 1 UNL1 | 0.1345  |
| 8 H  | -8.1847  | -0.2628 | -8.3492 H    | 1 UNL1 | 0.1326  |
| 9 H  | -6.8783  | -0.9133 | -9.3787 H    | 1 UNL1 | 0.1359  |
| 10 H | -8.2967  | 1.7977  | -9.8110 H    | 1 UNL1 | 0.1578  |
| 11 H | -7.0209  | 1.1385  | -10.8563 H   | 1 UNL1 | 0.1556  |
| 12 H | -9.7903  | -0.1572 | -10.3508 H   | 1 UNL1 | 0.1097  |
| 13 H | -9.9068  | 0.3882  | -12.6656 H   | 1 UNL1 | 0.3118  |
| 14 C | -9.0786  | -2.2884 | -11.7630 C.2 | 1 UNL1 | -0.3212 |
| 15 C | -8.3715  | -1.1602 | -11.6594 C.2 | 1 UNL1 | -0.1967 |
| 16 C | -4.7424  | 0.7798  | -6.1685 C.3  | 1 UNL1 | -0.4635 |
| 17 C | -5.7687  | -0.0077 | -6.9910 C.3  | 1 UNL1 | -0.2218 |
| 18 C | -6.3036  | 0.8125  | -8.1786 C.3  | 1 UNL1 | -0.2667 |
| 19 C | -7.3362  | 0.0262  | -9.0040 C.3  | 1 UNL1 | -0.2548 |
| 20 C | -7.8610  | 0.8522  | -10.1914 C.3 | 1 UNL1 | -0.3167 |
| 21 C | -8.9128  | 0.0810  | -10.9928 C.3 | 1 UNL1 | 0.1756  |
| 22 H | -4.3771  | 0.1733  | -5.3236 H    | 1 UNL1 | 0.1449  |
| 23 H | -7.3691  | -1.0705 | -12.0840 H   | 1 UNL1 | 0.1576  |
| 24 H | -8.6697  | -3.1664 | -12.2427 H   | 1 UNL1 | 0.1535  |
| 25 H | -10.0866 | -2.3990 | -11.3775 H   | 1 UNL1 | 0.1514  |

@<TRIPOS>BOND

```

1 13 1 1
2 24 14 1
3 23 15 1
4 1 21 1
5 14 15 2
6 14 25 1
7 15 21 1
8 21 12 1
9 21 20 1
10 11 20 1
11 20 10 1
12 20 19 1
13 9 19 1
14 19 8 1
15 19 18 1
16 7 18 1

```

```

17 18 6 1
18 18 17 1
19 5 17 1
20 17 4 1
21 17 16 1
22 2 16 1
23 16 3 1
24 16 22 1

```

## Compound 9

```

@<TRIPOS>MOLECULE
compuesto_9.out
26 27 0 0 0
SMALL
MULLIKEN_CHARGES

```

```
@<TRIPOS>ATOM
```

```

1 C -9.0296 0.9557 -10.7318 C.3 1 UNL1 -0.1793
2 H -6.3090 3.1143 -10.2393 H 1 UNL1 0.1590
3 H -7.8881 3.4767 -11.0141 H 1 UNL1 0.1616
4 H -7.3919 0.2133 -12.7450 H 1 UNL1 0.1627
5 H -7.9459 -1.4226 -13.1051 H 1 UNL1 0.1524
6 H -6.8610 -1.1689 -11.7596 H 1 UNL1 0.1595
7 H -10.4095 -2.0017 -11.7966 H 1 UNL1 0.1556
8 H -10.1376 -0.8898 -13.1552 H 1 UNL1 0.1563
9 H -11.0759 -0.3674 -11.7642 H 1 UNL1 0.1555
10 H -10.7252 0.1900 -9.4708 H 1 UNL1 0.1348
11 H -9.3574 0.7457 -8.5034 H 1 UNL1 0.1429
12 H -5.8842 0.2803 -10.2892 H 1 UNL1 0.1458
13 H -6.3592 0.9064 -8.7087 H 1 UNL1 0.1441
14 H -6.8138 -1.7253 -9.6952 H 1 UNL1 0.1290
15 H -7.4727 -1.0360 -8.2066 H 1 UNL1 0.1307
16 H -9.3385 -1.9486 -9.6758 H 1 UNL1 0.1227
17 H -9.6472 1.6827 -11.2684 H 1 UNL1 0.1384
18 C -7.2714 2.7302 -10.5378 C.2 1 UNL1 -0.4862
19 C -7.7162 -0.7302 -12.2881 C.3 1 UNL1 -0.5192
20 C -10.1981 -0.9551 -12.0608 C.3 1 UNL1 -0.5238
21 C -9.6357 0.2926 -9.4583 C.3 1 UNL1 -0.3020
22 C -7.6641 1.4689 -10.3334 C.2 1 UNL1 0.1526
23 C -6.7655 0.4611 -9.6399 C.3 1 UNL1 -0.3030
24 C -7.4351 -0.8981 -9.3044 C.3 1 UNL1 -0.2578
25 C -8.8540 -0.9889 -9.8766 C.3 1 UNL1 -0.1225
26 C -8.9094 -0.4848 -11.3739 C.3 1 UNL1 0.1903

```

```
@<TRIPOS>BOND
```

```

1 8 20 1
2 5 19 1
3 4 19 1
4 19 6 1
5 19 26 1
6 20 7 1
7 20 9 1
8 20 26 1
9 26 1 1
10 26 25 1
11 17 1 1
12 3 18 1
13 1 22 1
14 1 21 1
15 18 22 2
16 18 2 1
17 22 23 1
18 12 23 1
19 25 16 1
20 25 21 1
21 25 24 1
22 14 24 1

```

23 23 24 1  
 24 23 13 1  
 25 10 21 1  
 26 21 11 1  
 27 24 15 1

## Compound 10

@<TRIPOS>MOLECULE

compuesto\_10.out

26 25 0 0 0

SMALL

MULLIKEN\_CHARGES

@<TRIPOS>ATOM

|      |         |         |              |        |         |
|------|---------|---------|--------------|--------|---------|
| 1 C  | -8.9510 | 0.4149  | -11.4624 C.2 | 1 UNL1 | -0.3134 |
| 2 H  | -4.4464 | -1.6289 | -4.2633 H    | 1 UNL1 | 0.1618  |
| 3 H  | -3.0511 | -1.6234 | -5.3524 H    | 1 UNL1 | 0.1618  |
| 4 H  | -4.6598 | -1.9887 | -5.9779 H    | 1 UNL1 | 0.1597  |
| 5 H  | -8.0760 | -1.9405 | -10.3402 H   | 1 UNL1 | 0.1565  |
| 6 H  | -6.9810 | -2.0782 | -8.9238 H    | 1 UNL1 | 0.1569  |
| 7 H  | -2.4908 | 0.8285  | -4.6270 H    | 1 UNL1 | 0.1619  |
| 8 H  | -3.8827 | 0.8256  | -3.5361 H    | 1 UNL1 | 0.1620  |
| 9 H  | -3.7357 | 2.0710  | -4.7801 H    | 1 UNL1 | 0.1584  |
| 10 H | -5.1772 | 1.6946  | -6.6176 H    | 1 UNL1 | 0.1503  |
| 11 H | -6.5634 | -0.8701 | -6.9527 H    | 1 UNL1 | 0.1407  |
| 12 H | -5.1635 | -0.8684 | -8.0496 H    | 1 UNL1 | 0.1406  |
| 13 H | -7.3206 | 1.3400  | -7.9212 H    | 1 UNL1 | 0.1513  |
| 14 H | -5.9212 | 1.3444  | -9.0106 H    | 1 UNL1 | 0.1513  |
| 15 H | -8.0274 | 1.8812  | -10.2720 H   | 1 UNL1 | 0.1413  |
| 16 H | -9.1435 | -0.6187 | -11.7133 H   | 1 UNL1 | 0.1517  |
| 17 H | -9.4613 | 1.1117  | -12.1135 H   | 1 UNL1 | 0.1473  |
| 18 C | -4.1128 | -1.3522 | -5.2727 C.3  | 1 UNL1 | -0.5009 |
| 19 C | -7.4987 | -1.4124 | -9.5952 C.2  | 1 UNL1 | -0.4076 |
| 20 C | -3.5725 | 1.0065  | -4.5753 C.3  | 1 UNL1 | -0.5041 |
| 21 C | -4.3145 | 0.1102  | -5.5237 C.2  | 1 UNL1 | 0.1288  |
| 22 C | -5.0825 | 0.6147  | -6.5012 C.2  | 1 UNL1 | -0.2763 |
| 23 C | -5.8565 | -0.2020 | -7.4928 C.3  | 1 UNL1 | -0.2210 |
| 24 C | -6.6350 | 0.6724  | -8.4871 C.3  | 1 UNL1 | -0.3095 |
| 25 C | -7.4405 | -0.0779 | -9.5222 C.2  | 1 UNL1 | 0.1003  |
| 26 C | -8.1681 | 0.8106  | -10.4568 C.2 | 1 UNL1 | -0.1497 |

@<TRIPOS>BOND

|       |      |
|-------|------|
| 1 17  | 1 1  |
| 2 16  | 1 1  |
| 3 1   | 26 2 |
| 4 26  | 15 1 |
| 5 26  | 25 1 |
| 6 5   | 19 1 |
| 7 19  | 25 2 |
| 8 19  | 6 1  |
| 9 25  | 24 1 |
| 10 14 | 24 1 |
| 11 24 | 13 1 |
| 12 24 | 23 1 |
| 13 12 | 23 1 |
| 14 23 | 11 1 |
| 15 23 | 22 1 |
| 16 10 | 22 1 |
| 17 22 | 21 2 |
| 18 4  | 18 1 |
| 19 21 | 18 1 |
| 20 21 | 20 1 |
| 21 3  | 18 1 |
| 22 18 | 2 1  |
| 23 9  | 20 1 |
| 24 7  | 20 1 |
| 25 20 | 8 1  |



| Compound 11                                                                                                                                                                                                                                                                                                                                                                                                                                                                                                                                                                                                                                                                                                                                                                                                                                                                                                                                                                                                                                                                                                                                                                                                                                                                                                                                                                                                                                                                                                                                                                                                                                                                                                                          |  |  |  |  |  |  |  |  |  |
|--------------------------------------------------------------------------------------------------------------------------------------------------------------------------------------------------------------------------------------------------------------------------------------------------------------------------------------------------------------------------------------------------------------------------------------------------------------------------------------------------------------------------------------------------------------------------------------------------------------------------------------------------------------------------------------------------------------------------------------------------------------------------------------------------------------------------------------------------------------------------------------------------------------------------------------------------------------------------------------------------------------------------------------------------------------------------------------------------------------------------------------------------------------------------------------------------------------------------------------------------------------------------------------------------------------------------------------------------------------------------------------------------------------------------------------------------------------------------------------------------------------------------------------------------------------------------------------------------------------------------------------------------------------------------------------------------------------------------------------|--|--|--|--|--|--|--|--|--|
| @<TRIPOS>MOLECULE<br>compuesto_11.out<br>26 26 0 0<br>SMALL<br>MULLIKEN_CHARGES                                                                                                                                                                                                                                                                                                                                                                                                                                                                                                                                                                                                                                                                                                                                                                                                                                                                                                                                                                                                                                                                                                                                                                                                                                                                                                                                                                                                                                                                                                                                                                                                                                                      |  |  |  |  |  |  |  |  |  |
| @<TRIPOS>ATOM<br>1 C -11.1593 -0.0043 -14.3008 C.3 1 UNL1 -0.2560<br>2 H -9.2875 4.0841 -12.8206 H 1 UNL1 0.1620<br>3 H -8.2822 2.8516 -13.6067 H 1 UNL1 0.1626<br>4 H -8.7395 2.6754 -11.8802 H 1 UNL1 0.1638<br>5 H -12.4037 2.3047 -13.7563 H 1 UNL1 0.1601<br>6 H -11.6011 3.9067 -13.3855 H 1 UNL1 0.1564<br>7 H -10.0298 -4.0939 -12.2815 H 1 UNL1 0.1589<br>8 H -9.5634 -3.9769 -13.9972 H 1 UNL1 0.1614<br>9 H -11.2959 -4.0882 -13.5292 H 1 UNL1 0.1618<br>10 H -9.1239 0.5426 -13.8626 H 1 UNL1 0.1362<br>11 H -9.2864 0.3886 -11.4166 H 1 UNL1 0.1333<br>12 H -11.0791 0.3516 -11.4560 H 1 UNL1 0.1454<br>13 H -9.8959 -1.9891 -11.1582 H 1 UNL1 0.1439<br>14 H -11.5853 -2.0151 -14.9971 H 1 UNL1 0.1418<br>15 H -9.8649 -1.5353 -15.1798 H 1 UNL1 0.1446<br>16 H -12.1671 0.0227 -13.8294 H 1 UNL1 0.1404<br>17 H -11.2331 0.5000 -15.2898 H 1 UNL1 0.1322<br>18 C -9.0978 2.9984 -12.8726 C.3 1 UNL1 -0.5086<br>19 C -11.4944 2.8355 -13.4870 C.2 1 UNL1 -0.4499<br>20 C -10.3242 2.2159 -13.2746 C.2 1 UNL1 0.1286<br>21 C -10.3140 -3.6556 -13.2491 C.3 1 UNL1 -0.5006<br>22 C -10.1378 0.7125 -13.3991 C.3 1 UNL1 -0.1130<br>23 C -10.1641 0.0450 -12.0085 C.3 1 UNL1 -0.2447<br>24 C -10.1367 -1.4567 -12.0872 C.2 1 UNL1 -0.2526<br>25 C -10.3943 -2.1526 -13.2054 C.2 1 UNL1 0.0873<br>26 C -10.7473 -1.4713 -14.5050 C.3 1 UNL1 -0.2952<br>@<TRIPOS>BOND<br>1 17 1 1<br>2 15 26 1<br>3 14 26 1<br>4 26 1 1<br>5 26 25 1<br>6 1 16 1<br>7 1 22 1<br>8 8 21 1<br>9 10 22 1<br>10 5 19 1<br>11 3 18 1<br>12 9 21 1<br>13 19 6 1<br>14 19 20 2<br>15 22 20 1<br>16 22 23 1<br>17 20 18 1<br>18 21 25 1<br>19 21 7 1<br>20 25 24 2<br>21 18 2 1<br>22 18 4 1<br>23 24 23 1<br>24 24 13 1<br>25 23 12 1<br>26 23 11 1 |  |  |  |  |  |  |  |  |  |
| Compound 12                                                                                                                                                                                                                                                                                                                                                                                                                                                                                                                                                                                                                                                                                                                                                                                                                                                                                                                                                                                                                                                                                                                                                                                                                                                                                                                                                                                                                                                                                                                                                                                                                                                                                                                          |  |  |  |  |  |  |  |  |  |
| @<TRIPOS>MOLECULE<br>compuesto_12.out<br>24 24 0 0                                                                                                                                                                                                                                                                                                                                                                                                                                                                                                                                                                                                                                                                                                                                                                                                                                                                                                                                                                                                                                                                                                                                                                                                                                                                                                                                                                                                                                                                                                                                                                                                                                                                                   |  |  |  |  |  |  |  |  |  |

SMALL  
MULLIKEN\_CHARGES

@<TRIPOS>ATOM

|      |          |         |              |        |         |
|------|----------|---------|--------------|--------|---------|
| 1 C  | -8.9637  | 0.0801  | -0.8023 C.ar | 1 UNL1 | -0.1563 |
| 2 C  | -8.4561  | -1.1909 | -0.5307 C.ar | 1 UNL1 | -0.2060 |
| 3 C  | -9.1386  | -2.0666 | 0.3253 C.ar  | 1 UNL1 | 0.0995  |
| 4 C  | -10.3511 | -1.6502 | 0.8978 C.ar  | 1 UNL1 | -0.2104 |
| 5 C  | -10.8574 | -0.3805 | 0.6248 C.ar  | 1 UNL1 | -0.1399 |
| 6 C  | -10.1710 | 0.4985  | -0.2308 C.ar | 1 UNL1 | -0.0176 |
| 7 C  | -10.7202 | 1.8707  | -0.5351 C.3  | 1 UNL1 | -0.0043 |
| 8 C  | -12.0843 | 1.7660  | -1.2352 C.3  | 1 UNL1 | -0.4875 |
| 9 C  | -10.8027 | 2.7008  | 0.7536 C.3   | 1 UNL1 | -0.4886 |
| 10 C | -8.5799  | -3.4213 | 0.6301 C.3   | 1 UNL1 | -0.4980 |
| 11 H | -8.4071  | 0.7478  | -1.4530 H    | 1 UNL1 | 0.1439  |
| 12 H | -7.5183  | -1.5069 | -0.9841 H    | 1 UNL1 | 0.1488  |
| 13 H | -10.9051 | -2.3187 | 1.5535 H     | 1 UNL1 | 0.1491  |
| 14 H | -11.7945 | -0.0678 | 1.0829 H     | 1 UNL1 | 0.1448  |
| 15 H | -10.0251 | 2.4017  | -1.2327 H    | 1 UNL1 | 0.1192  |
| 16 H | -12.4586 | 2.7520  | -1.5267 H    | 1 UNL1 | 0.1489  |
| 17 H | -12.0088 | 1.1515  | -2.1422 H    | 1 UNL1 | 0.1539  |
| 18 H | -12.8400 | 1.3012  | -0.5937 H    | 1 UNL1 | 0.1527  |
| 19 H | -11.1255 | 3.7245  | 0.5498 H     | 1 UNL1 | 0.1486  |
| 20 H | -9.8208  | 2.7486  | 1.2482 H     | 1 UNL1 | 0.1543  |
| 21 H | -11.5041 | 2.2758  | 1.4774 H     | 1 UNL1 | 0.1526  |
| 22 H | -7.4874  | -3.4451 | 0.5875 H     | 1 UNL1 | 0.1619  |
| 23 H | -8.8711  | -3.7746 | 1.6343 H     | 1 UNL1 | 0.1629  |
| 24 H | -8.9619  | -4.1573 | -0.1033 H    | 1 UNL1 | 0.1673  |

@<TRIPOS>BOND

|    |    |    |    |
|----|----|----|----|
| 1  | 17 | 8  | 1  |
| 2  | 16 | 8  | 1  |
| 3  | 11 | 1  | 1  |
| 4  | 8  | 18 | 1  |
| 5  | 8  | 7  | 1  |
| 6  | 15 | 7  | 1  |
| 7  | 12 | 2  | 1  |
| 8  | 1  | 2  | ar |
| 9  | 1  | 6  | ar |
| 10 | 7  | 6  | 1  |
| 11 | 7  | 9  | 1  |
| 12 | 2  | 3  | ar |
| 13 | 6  | 5  | ar |
| 14 | 24 | 10 | 1  |
| 15 | 3  | 10 | 1  |
| 16 | 3  | 4  | ar |
| 17 | 19 | 9  | 1  |
| 18 | 22 | 10 | 1  |
| 19 | 5  | 4  | ar |
| 20 | 5  | 14 | 1  |
| 21 | 10 | 23 | 1  |
| 22 | 9  | 20 | 1  |
| 23 | 9  | 21 | 1  |
| 24 | 4  | 13 | 1  |

### Compound 13

@<TRIPOS>MOLECULE

compuesto\_13.out

29 30 0 0 0

SMALL

MULLIKEN\_CHARGES

@<TRIPOS>ATOM

|     |         |         |              |        |         |
|-----|---------|---------|--------------|--------|---------|
| 1 C | -7.6969 | -0.8923 | -11.3083 C.3 | 1 UNL1 | -0.3729 |
| 2 H | -7.8926 | 2.6883  | -7.5181 H    | 1 UNL1 | 0.1628  |
| 3 H | -6.7495 | 1.4234  | -7.1334 H    | 1 UNL1 | 0.1524  |
| 4 H | -8.4063 | 0.8486  | -7.2900 H    | 1 UNL1 | 0.1978  |

|                   |          |         |              |        |         |
|-------------------|----------|---------|--------------|--------|---------|
| 5 H               | -7.7744  | 3.3451  | -10.0070 H   | 1 UNL1 | 0.1613  |
| 6 H               | -9.3155  | 2.5102  | -9.7040 H    | 1 UNL1 | 0.1698  |
| 7 H               | -8.3912  | 1.9402  | -11.0720 H   | 1 UNL1 | 0.1691  |
| 8 H               | -5.5657  | 1.5650  | -9.9285 H    | 1 UNL1 | 0.1308  |
| 9 H               | -5.4739  | -0.1027 | -8.0594 H    | 1 UNL1 | 0.1315  |
| 10 H              | -4.8000  | -0.8674 | -9.5204 H    | 1 UNL1 | 0.1261  |
| 11 H              | -5.6658  | 0.0530  | -11.8252 H   | 1 UNL1 | 0.1292  |
| 12 H              | -7.1104  | 0.9529  | -11.9563 H   | 1 UNL1 | 0.1279  |
| 13 H              | -6.2512  | -2.3648 | -9.8344 H    | 1 UNL1 | 0.1409  |
| 14 H              | -6.9321  | -2.2360 | -8.2443 H    | 1 UNL1 | 0.1492  |
| 15 H              | -8.5695  | -0.4549 | -11.8393 H   | 1 UNL1 | 0.1490  |
| 16 H              | -7.4488  | -1.8657 | -11.7967 H   | 1 UNL1 | 0.1469  |
| 17 C              | -9.3190  | -1.9644 | -9.5738 C.3  | 1 UNL1 | -0.5677 |
| 18 C              | -7.6605  | 1.6005  | -7.7066 C.3  | 1 UNL1 | -0.5622 |
| 19 C              | -8.2849  | 2.3442  | -10.0439 C.3 | 1 UNL1 | -0.5689 |
| 20 C              | -7.6124  | 1.2410  | -9.2033 C.3  | 1 UNL1 | 0.4385  |
| 21 O              | -8.5108  | 0.0933  | -9.2337 O.3  | 1 UNL1 | -0.5757 |
| 22 C              | -6.2952  | 0.7328  | -9.8705 C.3  | 1 UNL1 | -0.1715 |
| 23 C              | -5.7341  | -0.4664 | -9.0714 C.3  | 1 UNL1 | -0.2302 |
| 24 C              | -6.6198  | 0.2196  | -11.3101 C.3 | 1 UNL1 | -0.2473 |
| 25 C              | -6.7380  | -1.6423 | -9.1576 C.3  | 1 UNL1 | -0.3673 |
| 26 C              | -8.0430  | -1.1609 | -9.8320 C.3  | 1 UNL1 | 0.4480  |
| 27 H              | -9.7414  | -1.3944 | -8.6917 H    | 1 UNL1 | 0.2025  |
| 28 H              | -10.0419 | -1.8073 | -10.3814 H   | 1 UNL1 | 0.1639  |
| 29 H              | -9.2520  | -3.0682 | -9.4309 H    | 1 UNL1 | 0.1660  |
| @<TRIPOS>BOND     |          |         |              |        |         |
| 1                 | 12       | 24      | 1            |        |         |
| 2                 | 15       | 1       | 1            |        |         |
| 3                 | 11       | 24      | 1            |        |         |
| 4                 | 16       | 1       | 1            |        |         |
| 5                 | 24       | 1       | 1            |        |         |
| 6                 | 24       | 22      | 1            |        |         |
| 7                 | 1        | 26      | 1            |        |         |
| 8                 | 7        | 19      | 1            |        |         |
| 9                 | 28       | 17      | 1            |        |         |
| 10                | 19       | 5       | 1            |        |         |
| 11                | 19       | 6       | 1            |        |         |
| 12                | 19       | 20      | 1            |        |         |
| 13                | 8        | 22      | 1            |        |         |
| 14                | 22       | 20      | 1            |        |         |
| 15                | 22       | 23      | 1            |        |         |
| 16                | 13       | 25      | 1            |        |         |
| 17                | 26       | 17      | 1            |        |         |
| 18                | 26       | 21      | 1            |        |         |
| 19                | 26       | 25      | 1            |        |         |
| 20                | 17       | 29      | 1            |        |         |
| 21                | 17       | 27      | 1            |        |         |
| 22                | 10       | 23      | 1            |        |         |
| 23                | 21       | 20      | 1            |        |         |
| 24                | 20       | 18      | 1            |        |         |
| 25                | 25       | 23      | 1            |        |         |
| 26                | 25       | 14      | 1            |        |         |
| 27                | 23       | 9       | 1            |        |         |
| 28                | 18       | 2       | 1            |        |         |
| 29                | 18       | 4       | 1            |        |         |
| 30                | 18       | 3       | 1            |        |         |
| Compound 14       |          |         |              |        |         |
| @<TRIPOS>MOLECULE |          |         |              |        |         |
| compuesto_14.out  |          |         |              |        |         |
| 29 28 0 0 0       |          |         |              |        |         |
| SMALL             |          |         |              |        |         |
| MULLIKEN_CHARGES  |          |         |              |        |         |
| @<TRIPOS>ATOM     |          |         |              |        |         |
| 1 C               | -7.2468  | 0.0097  | -9.4289 C.3  | 1 UNL1 | 0.4030  |

|                   |         |         |              |        |         |
|-------------------|---------|---------|--------------|--------|---------|
| 2 H               | -7.4671 | 2.1241  | -8.8997 H    | 1 UNL1 | 0.1562  |
| 3 H               | -8.0350 | 0.1206  | -11.2908 H   | 1 UNL1 | 0.3106  |
| 4 H               | -7.7147 | -1.5968 | -8.1067 H    | 1 UNL1 | 0.1760  |
| 5 H               | -7.4237 | -2.1368 | -9.7639 H    | 1 UNL1 | 0.1729  |
| 6 H               | -8.9792 | -1.3737 | -9.4130 H    | 1 UNL1 | 0.1648  |
| 7 H               | -2.2371 | 0.2522  | -5.1820 H    | 1 UNL1 | 0.1660  |
| 8 H               | -3.3942 | 1.1875  | -4.2392 H    | 1 UNL1 | 0.1581  |
| 9 H               | -3.0001 | 1.7189  | -5.8872 H    | 1 UNL1 | 0.1652  |
| 10 H              | -3.2964 | -0.1791 | -7.6869 H    | 1 UNL1 | 0.1513  |
| 11 H              | -6.1600 | -1.2518 | -7.3097 H    | 1 UNL1 | 0.1316  |
| 12 H              | -4.9654 | -1.9005 | -8.4323 H    | 1 UNL1 | 0.1328  |
| 13 H              | -5.4193 | 1.0498  | -8.7755 H    | 1 UNL1 | 0.1596  |
| 14 H              | -5.2143 | -0.1971 | -10.0119 H   | 1 UNL1 | 0.1698  |
| 15 C              | -5.5347 | -0.0631 | -4.9916 C.3  | 1 UNL1 | -0.4999 |
| 16 C              | -9.1265 | 1.0844  | -8.1017 C.2  | 1 UNL1 | -0.3176 |
| 17 C              | -7.9847 | 1.1650  | -8.7796 C.2  | 1 UNL1 | -0.2012 |
| 18 O              | -7.1840 | 0.2806  | -10.8536 O.3 | 1 UNL1 | -0.5947 |
| 19 C              | -7.9007 | -1.3479 | -9.1719 C.3  | 1 UNL1 | -0.5756 |
| 20 C              | -3.1751 | 0.8361  | -5.2527 C.3  | 1 UNL1 | -0.5132 |
| 21 C              | -4.3272 | 0.0862  | -5.8655 C.2  | 1 UNL1 | 0.1443  |
| 22 C              | -4.2242 | -0.3344 | -7.1354 C.2  | 1 UNL1 | -0.2911 |
| 23 C              | -5.3105 | -0.9555 | -7.9576 C.3  | 1 UNL1 | -0.2125 |
| 24 C              | -5.7440 | 0.0270  | -9.0619 C.3  | 1 UNL1 | -0.3420 |
| 25 H              | -9.5404 | 1.9339  | -7.5774 H    | 1 UNL1 | 0.1478  |
| 26 H              | -9.7284 | 0.1889  | -8.0024 H    | 1 UNL1 | 0.1492  |
| 27 H              | -5.2459 | -0.6239 | -4.0819 H    | 1 UNL1 | 0.1634  |
| 28 H              | -5.9079 | 0.9179  | -4.6586 H    | 1 UNL1 | 0.1621  |
| 29 H              | -6.3865 | -0.5561 | -5.5008 H    | 1 UNL1 | 0.1628  |
| @<TRIPOS>BOND     |         |         |              |        |         |
| 1                 | 3       | 18      | 1            |        |         |
| 2                 | 18      | 1       | 1            |        |         |
| 3                 | 14      | 24      | 1            |        |         |
| 4                 | 5       | 19      | 1            |        |         |
| 5                 | 1       | 19      | 1            |        |         |
| 6                 | 1       | 24      | 1            |        |         |
| 7                 | 1       | 17      | 1            |        |         |
| 8                 | 6       | 19      | 1            |        |         |
| 9                 | 19      | 4       | 1            |        |         |
| 10                | 24      | 13      | 1            |        |         |
| 11                | 24      | 23      | 1            |        |         |
| 12                | 2       | 17      | 1            |        |         |
| 13                | 17      | 16      | 2            |        |         |
| 14                | 12      | 23      | 1            |        |         |
| 15                | 16      | 26      | 1            |        |         |
| 16                | 16      | 25      | 1            |        |         |
| 17                | 23      | 11      | 1            |        |         |
| 18                | 23      | 22      | 1            |        |         |
| 19                | 10      | 22      | 1            |        |         |
| 20                | 22      | 21      | 2            |        |         |
| 21                | 9       | 20      | 1            |        |         |
| 22                | 21      | 20      | 1            |        |         |
| 23                | 21      | 15      | 1            |        |         |
| 24                | 29      | 15      | 1            |        |         |
| 25                | 20      | 7       | 1            |        |         |
| 26                | 20      | 8       | 1            |        |         |
| 27                | 15      | 28      | 1            |        |         |
| 28                | 15      | 27      | 1            |        |         |
| Compound 15       |         |         |              |        |         |
| @<TRIPOS>MOLECULE |         |         |              |        |         |
| compuesto_15.out  |         |         |              |        |         |
| 32 31 0 0 0       |         |         |              |        |         |
| SMALL             |         |         |              |        |         |
| MULLIKEN_CHARGES  |         |         |              |        |         |
| @<TRIPOS>ATOM     |         |         |              |        |         |

|               |    |          |         |              |   |      |         |
|---------------|----|----------|---------|--------------|---|------|---------|
| 1             | C  | -9.3721  | 1.0777  | -12.7652 C.3 | 1 | UNL1 | -0.4978 |
| 2             | H  | -5.3158  | -0.6419 | -4.9619 H    | 1 | UNL1 | 0.1251  |
| 3             | H  | -8.9770  | -2.0372 | -11.1977 H   | 1 | UNL1 | 0.1515  |
| 4             | H  | -8.0420  | -1.4026 | -12.5777 H   | 1 | UNL1 | 0.1550  |
| 5             | H  | -9.8162  | -1.6259 | -12.7178 H   | 1 | UNL1 | 0.1539  |
| 6             | H  | -6.0720  | 1.4942  | -6.0649 H    | 1 | UNL1 | 0.1847  |
| 7             | H  | -4.8924  | 1.1926  | -7.3903 H    | 1 | UNL1 | 0.1878  |
| 8             | H  | -8.8652  | -0.1557 | -8.7927 H    | 1 | UNL1 | 0.1317  |
| 9             | H  | -7.5760  | -1.2213 | -9.5615 H    | 1 | UNL1 | 0.1344  |
| 10            | H  | -8.2424  | 1.7021  | -10.3935 H   | 1 | UNL1 | 0.1557  |
| 11            | H  | -7.0917  | 0.5786  | -11.2210 H   | 1 | UNL1 | 0.1554  |
| 12            | H  | -10.1447 | 0.1418  | -10.9400 H   | 1 | UNL1 | 0.1104  |
| 13            | H  | -10.2463 | 0.7481  | -13.3994 H   | 1 | UNL1 | 0.1539  |
| 14            | H  | -8.4785  | 1.0868  | -13.3812 H   | 1 | UNL1 | 0.1538  |
| 15            | H  | -9.5887  | 2.1070  | -12.4323 H   | 1 | UNL1 | 0.1502  |
| 16            | C  | -3.8662  | -1.2286 | -6.4998 C.3  | 1 | UNL1 | -0.5051 |
| 17            | C  | -3.6645  | 0.7772  | -4.9372 C.3  | 1 | UNL1 | -0.5062 |
| 18            | C  | -4.6436  | -0.1545 | -5.7005 C.3  | 1 | UNL1 | 0.0643  |
| 19            | O  | -7.1870  | -1.0818 | -6.9124 O.2  | 1 | UNL1 | -0.5243 |
| 20            | C  | -8.9843  | -1.3266 | -12.0473 C.3 | 1 | UNL1 | -0.5007 |
| 21            | C  | -5.5583  | 0.7022  | -6.6587 C.3  | 1 | UNL1 | -0.4445 |
| 22            | C  | -6.6155  | -0.1154 | -7.3469 C.2  | 1 | UNL1 | 0.6496  |
| 23            | O  | -6.8965  | 0.4604  | -8.5603 O.3  | 1 | UNL1 | -0.4625 |
| 24            | C  | -7.9047  | -0.1735 | -9.3605 C.3  | 1 | UNL1 | -0.0050 |
| 25            | C  | -8.0432  | 0.6337  | -10.6629 C.3 | 1 | UNL1 | -0.3398 |
| 26            | C  | -9.2187  | 0.1180  | -11.5584 C.3 | 1 | UNL1 | 0.0302  |
| 27            | H  | -4.2202  | 1.5385  | -4.3462 H    | 1 | UNL1 | 0.1529  |
| 28            | H  | -3.0521  | 0.1880  | -4.2525 H    | 1 | UNL1 | 0.1567  |
| 29            | H  | -3.0028  | 1.3031  | -5.6511 H    | 1 | UNL1 | 0.1558  |
| 30            | H  | -4.5618  | -1.9267 | -7.0151 H    | 1 | UNL1 | 0.1632  |
| 31            | H  | -3.2229  | -0.7665 | -7.2456 H    | 1 | UNL1 | 0.1520  |
| 32            | H  | -3.2318  | -1.8332 | -5.7959 H    | 1 | UNL1 | 0.1576  |
| @<TRIPOS>BOND |    |          |         |              |   |      |         |
| 1             | 13 | 1        | 1       |              |   |      |         |
| 2             | 14 | 1        | 1       |              |   |      |         |
| 3             | 1  | 15       | 1       |              |   |      |         |
| 4             | 1  | 26       | 1       |              |   |      |         |
| 5             | 5  | 20       | 1       |              |   |      |         |
| 6             | 4  | 20       | 1       |              |   |      |         |
| 7             | 20 | 26       | 1       |              |   |      |         |
| 8             | 20 | 3        | 1       |              |   |      |         |
| 9             | 26 | 12       | 1       |              |   |      |         |
| 10            | 26 | 25       | 1       |              |   |      |         |
| 11            | 11 | 25       | 1       |              |   |      |         |
| 12            | 25 | 10       | 1       |              |   |      |         |
| 13            | 25 | 24       | 1       |              |   |      |         |
| 14            | 9  | 24       | 1       |              |   |      |         |
| 15            | 24 | 8        | 1       |              |   |      |         |
| 16            | 24 | 23       | 1       |              |   |      |         |
| 17            | 23 | 22       | 1       |              |   |      |         |
| 18            | 7  | 21       | 1       |              |   |      |         |
| 19            | 22 | 19       | 2       |              |   |      |         |
| 20            | 22 | 21       | 1       |              |   |      |         |
| 21            | 31 | 16       | 1       |              |   |      |         |
| 22            | 30 | 16       | 1       |              |   |      |         |
| 23            | 21 | 6        | 1       |              |   |      |         |
| 24            | 21 | 18       | 1       |              |   |      |         |
| 25            | 16 | 32       | 1       |              |   |      |         |
| 26            | 16 | 18       | 1       |              |   |      |         |
| 27            | 18 | 2        | 1       |              |   |      |         |
| 28            | 18 | 17       | 1       |              |   |      |         |
| 29            | 29 | 17       | 1       |              |   |      |         |
| 30            | 17 | 27       | 1       |              |   |      |         |
| 31            | 17 | 28       | 1       |              |   |      |         |
| Compound 16   |    |          |         |              |   |      |         |

@<TRIPOS>MOLECULE

compuesto\_16.out

27 28 0 0 0

SMALL

MULLIKEN\_CHARGES

@<TRIPOS>ATOM

|    |   |          |         |          |     |   |      |         |
|----|---|----------|---------|----------|-----|---|------|---------|
| 1  | C | -11.6476 | -1.2493 | -13.5009 | C.3 | 1 | UNL1 | -0.2781 |
| 2  | C | -10.6733 | 1.3528  | -14.6932 | C.3 | 1 | UNL1 | -0.5050 |
| 3  | C | -8.7035  | 1.2580  | -13.1846 | C.3 | 1 | UNL1 | -0.5196 |
| 4  | C | -9.3012  | -1.5844 | -14.5444 | C.3 | 1 | UNL1 | -0.4740 |
| 5  | O | -9.0396  | -2.1562 | -11.6580 | O.2 | 1 | UNL1 | -0.4839 |
| 6  | H | -12.0267 | -1.2531 | -14.5411 | H   | 1 | UNL1 | 0.1431  |
| 7  | H | -11.8327 | -2.2467 | -13.0708 | H   | 1 | UNL1 | 0.1399  |
| 8  | H | -10.9773 | -0.5793 | -10.3768 | H   | 1 | UNL1 | 0.1774  |
| 9  | H | -9.5202  | 0.4333  | -10.6174 | H   | 1 | UNL1 | 0.1772  |
| 10 | H | -12.8527 | -0.5135 | -11.7846 | H   | 1 | UNL1 | 0.1371  |
| 11 | H | -12.9748 | 0.4983  | -13.2633 | H   | 1 | UNL1 | 0.1363  |
| 12 | H | -11.3066 | 1.7240  | -11.8568 | H   | 1 | UNL1 | 0.1271  |
| 13 | H | -10.0008 | 1.2304  | -15.5650 | H   | 1 | UNL1 | 0.1573  |
| 14 | H | -11.6592 | 0.9769  | -15.0097 | H   | 1 | UNL1 | 0.1559  |
| 15 | H | -10.8127 | 2.4356  | -14.4776 | H   | 1 | UNL1 | 0.1544  |
| 16 | H | -8.1271  | 0.7390  | -12.3905 | H   | 1 | UNL1 | 0.1582  |
| 17 | H | -8.0918  | 1.2063  | -14.0977 | H   | 1 | UNL1 | 0.1595  |
| 18 | H | -8.8055  | 2.3246  | -12.9001 | H   | 1 | UNL1 | 0.1574  |
| 19 | H | -8.2271  | -1.3434 | -14.4307 | H   | 1 | UNL1 | 0.1609  |
| 20 | H | -9.3962  | -2.6877 | -14.4687 | H   | 1 | UNL1 | 0.1639  |
| 21 | H | -9.6223  | -1.2759 | -15.5579 | H   | 1 | UNL1 | 0.1546  |
| 22 | C | -10.1001 | 0.6615  | -13.4462 | C.3 | 1 | UNL1 | 0.1604  |
| 23 | C | -11.0581 | 0.7128  | -12.1932 | C.3 | 1 | UNL1 | -0.0927 |
| 24 | C | -12.2857 | -0.1200 | -12.6512 | C.3 | 1 | UNL1 | -0.2840 |
| 25 | C | -10.3119 | -0.1398 | -11.1380 | C.3 | 1 | UNL1 | -0.4589 |
| 26 | C | -9.7105  | -1.2273 | -12.0207 | C.2 | 1 | UNL1 | 0.5282  |
| 27 | C | -10.1272 | -0.9046 | -13.4750 | C.3 | 1 | UNL1 | -0.0526 |

@<TRIPOS>BOND

|    |    |    |   |
|----|----|----|---|
| 1  | 13 | 2  | 1 |
| 2  | 21 | 4  | 1 |
| 3  | 14 | 2  | 1 |
| 4  | 2  | 15 | 1 |
| 5  | 2  | 22 | 1 |
| 6  | 4  | 20 | 1 |
| 7  | 4  | 19 | 1 |
| 8  | 4  | 27 | 1 |
| 9  | 6  | 1  | 1 |
| 10 | 17 | 3  | 1 |
| 11 | 1  | 27 | 1 |
| 12 | 1  | 7  | 1 |
| 13 | 1  | 24 | 1 |
| 14 | 27 | 22 | 1 |
| 15 | 27 | 26 | 1 |
| 16 | 22 | 3  | 1 |
| 17 | 22 | 23 | 1 |
| 18 | 11 | 24 | 1 |
| 19 | 3  | 18 | 1 |
| 20 | 3  | 16 | 1 |
| 21 | 24 | 23 | 1 |
| 22 | 24 | 10 | 1 |
| 23 | 23 | 12 | 1 |
| 24 | 23 | 25 | 1 |
| 25 | 26 | 5  | 2 |
| 26 | 26 | 25 | 1 |
| 27 | 25 | 9  | 1 |
| 28 | 25 | 8  | 1 |

Compound 17

@<TRIPOS>MOLECULE

compuesto\_17.out

29 29 0 0 0

SMALL

MULLIKEN\_CHARGES

@<TRIPOS>ATOM

|      |         |         |              |        |         |
|------|---------|---------|--------------|--------|---------|
| 1 C  | -8.1201 | -0.1052 | -9.6643 C.2  | 1 UNL1 | 0.5636  |
| 2 C  | -7.7878 | -1.5340 | -10.0692 C.3 | 1 UNL1 | -0.4824 |
| 3 C  | -6.6057 | -2.1067 | -9.2613 C.3  | 1 UNL1 | 0.0276  |
| 4 C  | -6.6888 | -1.5568 | -7.8243 C.3  | 1 UNL1 | -0.3177 |
| 5 C  | -6.4930 | -0.0289 | -7.7891 C.3  | 1 UNL1 | -0.2381 |
| 6 C  | -6.9521 | 0.6820  | -9.0827 C.3  | 1 UNL1 | -0.2801 |
| 7 C  | -7.2078 | 2.2009  | -8.8969 C.3  | 1 UNL1 | 0.0348  |
| 8 C  | -7.4387 | 2.9021  | -10.2539 C.3 | 1 UNL1 | -0.5039 |
| 9 C  | -6.0370 | 2.9077  | -8.1806 C.3  | 1 UNL1 | -0.5001 |
| 10 C | -6.6085 | -3.6429 | -9.2822 C.3  | 1 UNL1 | -0.5048 |
| 11 O | -9.2319 | 0.3379  | -9.8027 O.2  | 1 UNL1 | -0.5003 |
| 12 H | -8.6973 | -2.1604 | -9.8953 H    | 1 UNL1 | 0.1857  |
| 13 H | -7.5602 | -1.5571 | -11.1619 H   | 1 UNL1 | 0.1755  |
| 14 H | -5.6456 | -1.7573 | -9.7115 H    | 1 UNL1 | 0.1137  |
| 15 H | -7.6871 | -1.8241 | -7.4054 H    | 1 UNL1 | 0.1456  |
| 16 H | -5.9235 | -2.0417 | -7.1758 H    | 1 UNL1 | 0.1405  |
| 17 H | -7.0549 | 0.3731  | -6.9106 H    | 1 UNL1 | 0.1401  |
| 18 H | -5.4164 | 0.2023  | -7.6232 H    | 1 UNL1 | 0.1358  |
| 19 H | -6.1363 | 0.5873  | -9.8420 H    | 1 UNL1 | 0.1575  |
| 20 H | -8.1214 | 2.3330  | -8.2686 H    | 1 UNL1 | 0.1255  |
| 21 H | -8.2976 | 2.4617  | -10.8172 H   | 1 UNL1 | 0.1661  |
| 22 H | -7.6664 | 3.9807  | -10.1133 H   | 1 UNL1 | 0.1526  |
| 23 H | -6.5394 | 2.8303  | -10.9046 H   | 1 UNL1 | 0.1459  |
| 24 H | -5.9017 | 2.5398  | -7.1395 H    | 1 UNL1 | 0.1475  |
| 25 H | -5.0825 | 2.7482  | -8.7257 H    | 1 UNL1 | 0.1501  |
| 26 H | -6.2158 | 4.0074  | -8.1150 H    | 1 UNL1 | 0.1540  |
| 27 H | -6.5640 | -4.0284 | -10.3274 H   | 1 UNL1 | 0.1548  |
| 28 H | -5.7264 | -4.0495 | -8.7421 H    | 1 UNL1 | 0.1537  |
| 29 H | -7.5231 | -4.0475 | -8.8020 H    | 1 UNL1 | 0.1566  |

@<TRIPOS>BOND

|    |    |    |   |
|----|----|----|---|
| 1  | 13 | 2  | 1 |
| 2  | 23 | 8  | 1 |
| 3  | 21 | 8  | 1 |
| 4  | 27 | 10 | 1 |
| 5  | 8  | 22 | 1 |
| 6  | 8  | 7  | 1 |
| 7  | 2  | 12 | 1 |
| 8  | 2  | 1  | 1 |
| 9  | 2  | 3  | 1 |
| 10 | 19 | 6  | 1 |
| 11 | 11 | 1  | 2 |
| 12 | 14 | 3  | 1 |
| 13 | 1  | 6  | 1 |
| 14 | 10 | 3  | 1 |
| 15 | 10 | 29 | 1 |
| 16 | 10 | 28 | 1 |
| 17 | 3  | 4  | 1 |
| 18 | 6  | 7  | 1 |
| 19 | 6  | 5  | 1 |
| 20 | 7  | 20 | 1 |
| 21 | 7  | 9  | 1 |
| 22 | 25 | 9  | 1 |
| 23 | 9  | 26 | 1 |
| 24 | 9  | 24 | 1 |
| 25 | 4  | 5  | 1 |
| 26 | 4  | 15 | 1 |
| 27 | 4  | 16 | 1 |
| 28 | 5  | 18 | 1 |
| 29 | 5  | 17 | 1 |

## Compound 18

@<TRIPOS>MOLECULE

compuesto\_18.out

29 29 0 0 0

SMALL

MULLIKEN\_CHARGES

@<TRIPOS>ATOM

|      |         |         |          |     |   |      |         |
|------|---------|---------|----------|-----|---|------|---------|
| 1 H  | -7.3225 | -4.0277 | -11.2962 | H   | 1 | UNL1 | 0.1550  |
| 2 H  | -6.4801 | -4.0487 | -9.7057  | H   | 1 | UNL1 | 0.1536  |
| 3 H  | -8.2725 | -4.0529 | -9.7651  | H   | 1 | UNL1 | 0.1563  |
| 4 C  | -8.8742 | -0.1048 | -10.6267 | C.2 | 1 | UNL1 | 0.5634  |
| 5 C  | -8.5422 | -1.5338 | -11.0333 | C.3 | 1 | UNL1 | -0.4821 |
| 6 C  | -7.3597 | -2.1063 | -10.2261 | C.3 | 1 | UNL1 | 0.0276  |
| 7 C  | -7.4443 | -1.5581 | -8.7877  | C.3 | 1 | UNL1 | -0.3177 |
| 8 C  | -7.2465 | -0.0293 | -8.7536  | C.3 | 1 | UNL1 | -0.2381 |
| 9 C  | -7.7043 | 0.6818  | -10.0483 | C.3 | 1 | UNL1 | -0.2797 |
| 10 C | -7.9632 | 2.2014  | -9.8629  | C.3 | 1 | UNL1 | 0.0355  |
| 11 C | -8.1919 | 2.8987  | -11.2203 | C.3 | 1 | UNL1 | -0.5043 |
| 12 C | -6.7917 | 2.9068  | -9.1457  | C.3 | 1 | UNL1 | -0.5007 |
| 13 C | -7.3620 | -3.6433 | -10.2491 | C.3 | 1 | UNL1 | -0.5049 |
| 14 O | -9.9899 | 0.3369  | -10.7685 | O.2 | 1 | UNL1 | -0.5016 |
| 15 H | -9.4538 | -2.1591 | -10.8667 | H   | 1 | UNL1 | 0.1857  |
| 16 H | -8.3117 | -1.5598 | -12.1248 | H   | 1 | UNL1 | 0.1755  |
| 17 H | -6.3959 | -1.7569 | -10.6763 | H   | 1 | UNL1 | 0.1140  |
| 18 H | -8.4429 | -1.8269 | -8.3727  | H   | 1 | UNL1 | 0.1456  |
| 19 H | -6.6783 | -2.0417 | -8.1352  | H   | 1 | UNL1 | 0.1406  |
| 20 H | -7.8125 | 0.3734  | -7.8817  | H   | 1 | UNL1 | 0.1398  |
| 21 H | -6.1648 | 0.2005  | -8.5848  | H   | 1 | UNL1 | 0.1364  |
| 22 H | -6.8894 | 0.5915  | -10.8069 | H   | 1 | UNL1 | 0.1577  |
| 23 H | -8.8761 | 2.3284  | -9.2354  | H   | 1 | UNL1 | 0.1254  |
| 24 H | -9.0525 | 2.4679  | -11.7843 | H   | 1 | UNL1 | 0.1665  |
| 25 H | -8.4146 | 3.9812  | -11.0790 | H   | 1 | UNL1 | 0.1528  |
| 26 H | -7.2914 | 2.8301  | -11.8647 | H   | 1 | UNL1 | 0.1460  |
| 27 H | -6.6667 | 2.5442  | -8.1055  | H   | 1 | UNL1 | 0.1477  |
| 28 H | -5.8374 | 2.7491  | -9.6895  | H   | 1 | UNL1 | 0.1505  |
| 29 H | -6.9642 | 4.0033  | -9.0787  | H   | 1 | UNL1 | 0.1535  |

@<TRIPOS>BOND

|    |    |    |   |
|----|----|----|---|
| 1  | 16 | 5  | 1 |
| 2  | 26 | 11 | 1 |
| 3  | 24 | 11 | 1 |
| 4  | 1  | 13 | 1 |
| 5  | 11 | 25 | 1 |
| 6  | 11 | 10 | 1 |
| 7  | 5  | 15 | 1 |
| 8  | 5  | 4  | 1 |
| 9  | 5  | 6  | 1 |
| 10 | 22 | 9  | 1 |
| 11 | 14 | 4  | 2 |
| 12 | 17 | 6  | 1 |
| 13 | 4  | 9  | 1 |
| 14 | 13 | 6  | 1 |
| 15 | 13 | 3  | 1 |
| 16 | 13 | 2  | 1 |
| 17 | 6  | 7  | 1 |
| 18 | 9  | 10 | 1 |
| 19 | 9  | 8  | 1 |
| 20 | 10 | 23 | 1 |
| 21 | 10 | 12 | 1 |
| 22 | 28 | 12 | 1 |
| 23 | 12 | 29 | 1 |
| 24 | 12 | 27 | 1 |
| 25 | 7  | 8  | 1 |
| 26 | 7  | 18 | 1 |
| 27 | 7  | 19 | 1 |



|                                                                                    |    |                            |                |
|------------------------------------------------------------------------------------|----|----------------------------|----------------|
| 28                                                                                 | 8  | 21                         | 1              |
| 29                                                                                 | 8  | 20                         | 1              |
| Compound 19                                                                        |    |                            |                |
| @@<TRIPOS>MOLECULE<br>compuesto_19.out<br>29 30 0 0 0<br>SMALL<br>MULLIKEN_CHARGES |    |                            |                |
| @@<TRIPOS>ATOM                                                                     |    |                            |                |
| 1                                                                                  | C  | 7.5611 -0.7301 11.6223 C.3 | 1 UNL1 -0.2821 |
| 2                                                                                  | C  | 5.8507 0.8587 10.8704 C.3  | 1 UNL1 0.1322  |
| 3                                                                                  | O  | 6.3912 -2.6868 9.9712 O.3  | 1 UNL1 -0.5619 |
| 4                                                                                  | C  | 5.1452 -1.1316 12.4338 C.3 | 1 UNL1 -0.5085 |
| 5                                                                                  | C  | 6.1899 1.8937 11.9540 C.3  | 1 UNL1 -0.5069 |
| 6                                                                                  | C  | 4.4634 1.2279 10.3171 C.3  | 1 UNL1 -0.5128 |
| 7                                                                                  | H  | 4.7021 -1.5289 9.7734 H    | 1 UNL1 0.0965  |
| 8                                                                                  | H  | 7.7668 -0.3667 12.6408 H   | 1 UNL1 0.1284  |
| 9                                                                                  | H  | 7.9383 -1.7583 11.5448 H   | 1 UNL1 0.1545  |
| 10                                                                                 | H  | 7.2740 -0.9677 8.3732 H    | 1 UNL1 0.1564  |
| 11                                                                                 | H  | 5.7225 -0.1527 8.1507 H    | 1 UNL1 0.1367  |
| 12                                                                                 | H  | 8.9000 -0.3360 9.9122 H    | 1 UNL1 0.1348  |
| 13                                                                                 | H  | 8.7427 1.0296 11.0023 H    | 1 UNL1 0.1253  |
| 14                                                                                 | H  | 7.1447 1.6171 9.1886 H     | 1 UNL1 0.1191  |
| 15                                                                                 | H  | 6.0819 -3.1822 9.1875 H    | 1 UNL1 0.3046  |
| 16                                                                                 | H  | 4.0853 -0.9662 12.2328 H   | 1 UNL1 0.1526  |
| 17                                                                                 | H  | 5.3282 -2.1913 12.6454 H   | 1 UNL1 0.1674  |
| 18                                                                                 | H  | 5.3243 -0.5690 13.3451 H   | 1 UNL1 0.1541  |
| 19                                                                                 | H  | 6.2557 2.9079 11.5526 H    | 1 UNL1 0.1515  |
| 20                                                                                 | H  | 5.4327 1.8888 12.7430 H    | 1 UNL1 0.1521  |
| 21                                                                                 | H  | 7.1507 1.6625 12.4212 H    | 1 UNL1 0.1587  |
| 22                                                                                 | H  | 3.7298 1.2532 11.1366 H    | 1 UNL1 0.1543  |
| 23                                                                                 | H  | 4.5240 2.2347 9.8840 H     | 1 UNL1 0.1541  |
| 24                                                                                 | H  | 4.0815 0.5423 9.5390 H     | 1 UNL1 0.1517  |
| 25                                                                                 | C  | 6.9614 0.7139 9.7626 C.3   | 1 UNL1 -0.0959 |
| 26                                                                                 | C  | 8.1936 0.2002 10.5559 C.3  | 1 UNL1 -0.2748 |
| 27                                                                                 | C  | 6.4541 -0.4692 8.9029 C.3  | 1 UNL1 -0.3722 |
| 28                                                                                 | C  | 5.7862 -1.3877 9.9527 C.3  | 1 UNL1 0.1460  |
| 29                                                                                 | C  | 6.0322 -0.6533 11.3090 C.3 | 1 UNL1 0.0845  |
| @@<TRIPOS>BOND                                                                     |    |                            |                |
| 1                                                                                  | 11 | 27                         | 1              |
| 2                                                                                  | 10 | 27                         | 1              |
| 3                                                                                  | 27 | 25                         | 1              |
| 4                                                                                  | 27 | 28                         | 1              |
| 5                                                                                  | 15 | 3                          | 1              |
| 6                                                                                  | 14 | 25                         | 1              |
| 7                                                                                  | 24 | 6                          | 1              |
| 8                                                                                  | 25 | 26                         | 1              |
| 9                                                                                  | 25 | 2                          | 1              |
| 10                                                                                 | 7  | 28                         | 1              |
| 11                                                                                 | 23 | 6                          | 1              |
| 12                                                                                 | 12 | 26                         | 1              |
| 13                                                                                 | 28 | 3                          | 1              |
| 14                                                                                 | 28 | 29                         | 1              |
| 15                                                                                 | 6  | 2                          | 1              |
| 16                                                                                 | 6  | 22                         | 1              |
| 17                                                                                 | 26 | 13                         | 1              |
| 18                                                                                 | 26 | 1                          | 1              |
| 19                                                                                 | 2  | 29                         | 1              |
| 20                                                                                 | 2  | 5                          | 1              |
| 21                                                                                 | 29 | 1                          | 1              |
| 22                                                                                 | 29 | 4                          | 1              |
| 23                                                                                 | 9  | 1                          | 1              |
| 24                                                                                 | 19 | 5                          | 1              |
| 25                                                                                 | 1  | 8                          | 1              |

26 5 21 1  
 27 5 20 1  
 28 16 4 1  
 29 4 17 1  
 30 4 18 1

## Compound 20

@<TRIPOS>MOLECULE

compuesto\_20.out

31 31 0 0 0

SMALL

MULLIKEN\_CHARGES

@<TRIPOS>ATOM

|      |        |         |             |        |         |
|------|--------|---------|-------------|--------|---------|
| 1 C  | 5.8656 | 1.5293  | 10.9886 C.3 | 1 UNL1 | -0.3047 |
| 2 C  | 5.3891 | -2.2037 | 9.7823 C.3  | 1 UNL1 | 0.0171  |
| 3 C  | 6.3248 | -2.8841 | 10.8058 C.3 | 1 UNL1 | -0.5009 |
| 4 C  | 5.5410 | -2.9695 | 8.4530 C.3  | 1 UNL1 | -0.4928 |
| 5 H  | 4.8483 | 1.8105  | 11.3364 H   | 1 UNL1 | 0.1363  |
| 6 H  | 6.5726 | 1.9799  | 11.7145 H   | 1 UNL1 | 0.1345  |
| 7 H  | 5.3695 | -0.4126 | 11.7898 H   | 1 UNL1 | 0.1338  |
| 8 H  | 7.0589 | -0.2569 | 11.2486 H   | 1 UNL1 | 0.1348  |
| 9 H  | 6.5637 | -0.5936 | 8.9588 H    | 1 UNL1 | 0.1434  |
| 10 H | 3.6935 | 0.2144  | 9.7524 H    | 1 UNL1 | 0.0980  |
| 11 H | 5.4194 | 1.5209  | 7.5990 H    | 1 UNL1 | 0.1586  |
| 12 H | 4.1302 | 2.2398  | 8.6176 H    | 1 UNL1 | 0.1428  |
| 13 H | 7.0948 | 1.7629  | 9.2171 H    | 1 UNL1 | 0.1169  |
| 14 H | 6.2955 | 4.0322  | 8.5846 H    | 1 UNL1 | 0.1523  |
| 15 H | 5.1485 | 4.0549  | 9.9709 H    | 1 UNL1 | 0.1536  |
| 16 H | 6.9016 | 4.0427  | 10.2287 H   | 1 UNL1 | 0.1507  |
| 17 H | 3.3091 | 0.1215  | 7.4773 H    | 1 UNL1 | 0.3087  |
| 18 H | 4.3406 | -2.3193 | 10.1487 H   | 1 UNL1 | 0.1133  |
| 19 H | 6.1662 | -3.9766 | 10.8421 H   | 1 UNL1 | 0.1490  |
| 20 H | 7.3866 | -2.7304 | 10.5392 H   | 1 UNL1 | 0.1515  |
| 21 H | 6.1250 | -2.5173 | 11.8298 H   | 1 UNL1 | 0.1451  |
| 22 H | 5.3948 | -4.0542 | 8.6049 H    | 1 UNL1 | 0.1433  |
| 23 H | 4.8308 | -2.6266 | 7.6794 H    | 1 UNL1 | 0.1711  |
| 24 H | 6.5568 | -2.8438 | 8.0364 H    | 1 UNL1 | 0.1455  |
| 25 O | 3.9981 | -0.4578 | 7.8537 O.3  | 1 UNL1 | -0.5774 |
| 26 C | 6.1041 | 3.6457  | 9.5922 C.3  | 1 UNL1 | -0.5069 |
| 27 C | 6.0916 | 2.1115  | 9.5850 C.3  | 1 UNL1 | 0.0164  |
| 28 C | 5.0097 | 1.5669  | 8.6319 C.3  | 1 UNL1 | -0.4023 |
| 29 C | 4.5358 | 0.1546  | 9.0231 C.3  | 1 UNL1 | 0.1887  |
| 30 C | 5.6766 | -0.6800 | 9.6311 C.3  | 1 UNL1 | -0.1515 |
| 31 C | 6.0199 | -0.0045 | 10.9858 C.3 | 1 UNL1 | -0.2689 |

@<TRIPOS>BOND

|            |
|------------|
| 1 17 25 1  |
| 2 11 28 1  |
| 3 23 4 1   |
| 4 25 29 1  |
| 5 24 4 1   |
| 6 4 22 1   |
| 7 4 2 1    |
| 8 14 26 1  |
| 9 12 28 1  |
| 10 28 29 1 |
| 11 28 27 1 |
| 12 9 30 1  |
| 13 29 30 1 |
| 14 29 10 1 |
| 15 13 27 1 |
| 16 27 26 1 |
| 17 27 1 1  |
| 18 26 15 1 |
| 19 26 16 1 |
| 20 30 2 1  |

```

21 30 31 1
22 2 18 1
23 2 3 1
24 20 3 1
25 3 19 1
26 3 21 1
27 31 1 1
28 31 8 1
29 31 7 1
30 1 5 1
31 1 6 1

```

## Compound 21

@<TRIPOS>MOLECULE

compuesto\_21.out

31 31 0 0 0

SMALL

MULLIKEN\_CHARGES

@<TRIPOS>ATOM

|      |        |         |             |        |         |
|------|--------|---------|-------------|--------|---------|
| 1 C  | 6.8597 | 1.5159  | 12.0206 C.3 | 1 UNL1 | -0.2974 |
| 2 H  | 6.7320 | 2.0278  | 13.0008 H   | 1 UNL1 | 0.1314  |
| 3 H  | 7.9372 | 1.6018  | 11.7551 H   | 1 UNL1 | 0.1325  |
| 4 H  | 5.4289 | -0.0519 | 12.5293 H   | 1 UNL1 | 0.1475  |
| 5 H  | 7.1288 | -0.4099 | 12.9370 H   | 1 UNL1 | 0.1262  |
| 6 H  | 7.6901 | -0.6969 | 10.5272 H   | 1 UNL1 | 0.1298  |
| 7 H  | 6.0111 | -0.4932 | 8.7347 H    | 1 UNL1 | 0.0888  |
| 8 H  | 7.2284 | 1.5610  | 9.2659 H    | 1 UNL1 | 0.1496  |
| 9 H  | 5.5343 | 1.9472  | 8.8333 H    | 1 UNL1 | 0.1395  |
| 10 H | 4.9393 | 2.1734  | 11.2538 H   | 1 UNL1 | 0.1247  |
| 11 H | 5.7898 | 4.2013  | 10.0433 H   | 1 UNL1 | 0.1488  |
| 12 H | 6.2752 | 4.2364  | 11.7597 H   | 1 UNL1 | 0.1518  |
| 13 H | 7.4702 | 3.8039  | 10.4914 H   | 1 UNL1 | 0.1508  |
| 14 H | 5.1782 | -2.2949 | 11.3463 H   | 1 UNL1 | 0.1294  |
| 15 H | 7.0032 | -2.5940 | 13.0342 H   | 1 UNL1 | 0.1482  |
| 16 H | 6.8940 | -4.0506 | 12.0374 H   | 1 UNL1 | 0.1496  |
| 17 H | 8.1965 | -2.8638 | 11.7281 H   | 1 UNL1 | 0.1486  |
| 18 H | 5.5455 | -2.6538 | 8.9213 H    | 1 UNL1 | 0.1512  |
| 19 H | 7.3061 | -2.8972 | 9.1745 H    | 1 UNL1 | 0.1466  |
| 20 H | 6.1077 | -4.0818 | 9.7612 H    | 1 UNL1 | 0.1496  |
| 21 H | 3.9427 | 0.2638  | 9.2455 H    | 1 UNL1 | 0.3053  |
| 22 O | 4.4305 | -0.1443 | 9.9729 O.3  | 1 UNL1 | -0.5661 |
| 23 C | 6.3058 | -2.9994 | 9.6399 C.3  | 1 UNL1 | -0.4984 |
| 24 C | 7.1285 | -2.9665 | 11.9991 C.3 | 1 UNL1 | -0.4984 |
| 25 C | 6.2327 | -2.2440 | 10.9783 C.3 | 1 UNL1 | 0.0092  |
| 26 C | 6.4121 | 3.6937  | 10.8029 C.3 | 1 UNL1 | -0.5087 |
| 27 C | 6.0135 | 2.2169  | 10.9457 C.3 | 1 UNL1 | 0.0180  |
| 28 C | 6.1741 | 1.4711  | 9.6109 C.3  | 1 UNL1 | -0.3955 |
| 29 C | 5.8214 | -0.0157 | 9.7252 C.3  | 1 UNL1 | 0.1857  |
| 30 C | 6.6135 | -0.7374 | 10.8301 C.3 | 1 UNL1 | -0.1407 |
| 31 C | 6.4747 | 0.0346  | 12.1585 C.3 | 1 UNL1 | -0.2574 |

@<TRIPOS>BOND

```

1 7 29 1
2 9 28 1
3 18 23 1
4 19 23 1
5 21 22 1
6 8 28 1
7 28 29 1
8 28 27 1
9 23 20 1
10 23 25 1
11 29 22 1
12 29 30 1
13 11 26 1
14 13 26 1

```

```

15 6 30 1
16 26 27 1
17 26 12 1
18 30 25 1
19 30 31 1
20 27 10 1
21 27 1 1
22 25 14 1
23 25 24 1
24 17 24 1
25 3 1 1
26 24 16 1
27 24 15 1
28 1 31 1
29 1 2 1
30 31 4 1
31 31 5 1

```

## Compound 22

```

@<TRIPOS>MOLECULE
compuesto_22.out
25 25 0 0 0
SMALL
MULLIKEN_CHARGES

```

```
@<TRIPOS>ATOM
```

```

1 C      7.2692  1.5337 11.9205 C.2  1 UNL1  0.5500
2 H      5.4840  4.1336 10.5458 H   1 UNL1  0.1466
3 H      6.5522 -3.8850  9.9152 H   1 UNL1  0.1626
4 H      6.4118 -2.3069  8.9675 H   1 UNL1  0.1609
5 H      5.3898 -2.7568 13.0019 H   1 UNL1  0.1665
6 H      7.1568 -2.6350 13.0160 H   1 UNL1  0.1683
7 H      6.3459 -3.9669 12.2316 H   1 UNL1  0.1624
8 H      4.9656  2.1156  9.5081 H   1 UNL1  0.1403
9 H      4.7361 -0.3211  9.5889 H   1 UNL1  0.1546
10 H     6.4386 -0.0588  9.0847 H   1 UNL1  0.1625
11 H     5.2895 -0.4683 11.9482 H   1 UNL1  0.1391
12 H     7.6664 -0.4272 12.7442 H   1 UNL1  0.1804
13 H     8.2337 -0.1436 11.0474 H   1 UNL1  0.1821
14 C     6.2178  3.7200 11.2284 C.3  1 UNL1 -0.4358
15 O     7.9317  2.1277 12.7209 O.2  1 UNL1 -0.4907
16 C     6.4182 -2.8015  9.9358 C.2  1 UNL1 -0.4384
17 C     6.2935 -2.9056 12.3955 C.3  1 UNL1 -0.5122
18 C     6.2919 -2.1580 11.0930 C.2  1 UNL1  0.1247
19 C     6.3435  2.2386 11.0631 C.2  1 UNL1 -0.1634
20 C     5.6294  1.5611 10.1498 C.2  1 UNL1 -0.0789
21 C     5.7137  0.0843  9.9115 C.3  1 UNL1 -0.3068
22 H     5.9054  3.9787 12.2497 H   1 UNL1  0.1702
23 H     7.1636  4.2503 11.0077 H   1 UNL1  0.1700
24 C     6.1242 -0.6513 11.2148 C.3  1 UNL1 -0.0672
25 C     7.3979  0.0227 11.7621 C.3  1 UNL1 -0.4477

```

```
@<TRIPOS>BOND
```

```

1 4 16 1
2 10 21 1
3 8 20 1
4 9 21 1
5 21 20 1
6 21 24 1
7 3 16 1
8 16 18 2
9 20 19 2
10 2 14 1
11 23 14 1
12 13 25 1
13 19 14 1
14 19 1 1

```

15 18 24 1  
 16 18 17 1  
 17 24 25 1  
 18 24 11 1  
 19 14 22 1  
 20 25 1 1  
 21 25 12 1  
 22 1 15 2  
 23 7 17 1  
 24 17 5 1  
 25 17 6 1

## Compound 23

@<TRIPOS>MOLECULE

compuesto\_23.out

36 36 0 0 0

SMALL

MULLIKEN\_CHARGES

@<TRIPOS>ATOM

|      |        |         |             |        |         |
|------|--------|---------|-------------|--------|---------|
| 1 C  | 6.8000 | 1.5734  | 11.1391 C.3 | 1 UNL1 | -0.3035 |
| 2 H  | 4.2327 | -2.6376 | 8.6153 H    | 1 UNL1 | 0.1582  |
| 3 H  | 7.6187 | -2.7611 | 10.5307 H   | 1 UNL1 | 0.1540  |
| 4 H  | 6.4171 | -3.8959 | 11.1945 H   | 1 UNL1 | 0.1502  |
| 5 H  | 6.8055 | -2.4601 | 12.1054 H   | 1 UNL1 | 0.1464  |
| 6 H  | 4.6347 | -2.0521 | 10.9574 H   | 1 UNL1 | 0.1091  |
| 7 H  | 6.6996 | 4.0299  | 9.7364 H    | 1 UNL1 | 0.1575  |
| 8 H  | 6.1766 | 4.2827  | 11.4367 H   | 1 UNL1 | 0.1499  |
| 9 H  | 5.0022 | 4.4057  | 10.1219 H   | 1 UNL1 | 0.1541  |
| 10 H | 4.7258 | 2.2519  | 11.3461 H   | 1 UNL1 | 0.1121  |
| 11 H | 4.2357 | 2.3229  | 8.9428 H    | 1 UNL1 | 0.1681  |
| 12 H | 5.9469 | 1.8863  | 8.5529 H    | 1 UNL1 | 0.1662  |
| 13 H | 3.9086 | 0.1503  | 10.0427 H   | 1 UNL1 | 0.1182  |
| 14 H | 6.7833 | -0.5990 | 9.2848 H    | 1 UNL1 | 0.1417  |
| 15 H | 7.3569 | -0.3829 | 11.6690 H   | 1 UNL1 | 0.1370  |
| 16 H | 5.6723 | -0.0071 | 12.1103 H   | 1 UNL1 | 0.1346  |
| 17 H | 7.6275 | 1.6997  | 10.4209 H   | 1 UNL1 | 0.1430  |
| 18 H | 7.1357 | 2.0013  | 12.0924 H   | 1 UNL1 | 0.1342  |
| 19 O | 4.3048 | 1.3898  | 6.6615 O.2  | 1 UNL1 | -0.5275 |
| 20 C | 3.8801 | -0.8628 | 5.9555 C.3  | 1 UNL1 | -0.5890 |
| 21 C | 4.2140 | 0.2191  | 6.9419 C.2  | 1 UNL1 | 0.6934  |
| 22 O | 4.4197 | -0.3672 | 8.1529 O.3  | 1 UNL1 | -0.4954 |
| 23 C | 5.2039 | -2.9179 | 9.0520 C.3  | 1 UNL1 | -0.4865 |
| 24 C | 6.6660 | -2.8196 | 11.0893 C.3 | 1 UNL1 | -0.4994 |
| 25 C | 5.5436 | -2.0773 | 10.3217 C.3 | 1 UNL1 | 0.0117  |
| 26 C | 5.8913 | 3.8603  | 10.4611 C.3 | 1 UNL1 | -0.5002 |
| 27 C | 5.9470 | -0.5929 | 10.0053 C.3 | 1 UNL1 | -0.1620 |
| 28 C | 6.4312 | 0.1108  | 11.3164 C.3 | 1 UNL1 | -0.2648 |
| 29 H | 4.6917 | -1.5780 | 5.8476 H    | 1 UNL1 | 0.1968  |
| 30 H | 2.9552 | -1.3779 | 6.2495 H    | 1 UNL1 | 0.1964  |
| 31 H | 3.6981 | -0.4251 | 4.9522 H    | 1 UNL1 | 0.1987  |
| 32 H | 5.9859 | -2.7874 | 8.2890 H    | 1 UNL1 | 0.1500  |
| 33 H | 5.1402 | -4.0013 | 9.3114 H    | 1 UNL1 | 0.1438  |
| 34 C | 5.5784 | 2.3620  | 10.6270 C.3 | 1 UNL1 | 0.0016  |
| 35 C | 5.1411 | 1.7510  | 9.2673 C.3  | 1 UNL1 | -0.3812 |
| 36 C | 4.8102 | 0.2602  | 9.3810 C.3  | 1 UNL1 | 0.1828  |

@<TRIPOS>BOND

1 31 20 1  
 2 29 20 1  
 3 20 30 1  
 4 20 21 1  
 5 19 21 2  
 6 21 22 1  
 7 22 36 1  
 8 32 23 1  
 9 12 35 1

10 2 23 1  
 11 11 35 1  
 12 23 33 1  
 13 23 25 1  
 14 35 36 1  
 15 35 34 1  
 16 14 27 1  
 17 36 27 1  
 18 36 13 1  
 19 7 26 1  
 20 27 25 1  
 21 27 28 1  
 22 9 26 1  
 23 25 6 1  
 24 25 24 1  
 25 17 1 1  
 26 26 34 1  
 27 26 8 1  
 28 3 24 1  
 29 34 1 1  
 30 34 10 1  
 31 24 4 1  
 32 24 5 1  
 33 1 28 1  
 34 1 18 1  
 35 28 15 1  
 36 28 16 1

## Compound 24

@<TRIPOS>MOLECULE

compuesto\_24.out

39 41 0 0 0

SMALL

MULLIKEN\_CHARGES

@<TRIPOS>ATOM

|      |        |         |             |        |         |
|------|--------|---------|-------------|--------|---------|
| 1 C  | 6.3587 | 1.9152  | 13.2677 C.3 | 1 UNL1 | -0.2570 |
| 2 C  | 6.8329 | 1.2934  | 11.9516 C.3 | 1 UNL1 | 0.0103  |
| 3 C  | 6.4846 | -0.1897 | 11.7399 C.3 | 1 UNL1 | -0.1645 |
| 4 C  | 7.8453 | 0.1805  | 12.3321 C.3 | 1 UNL1 | -0.2482 |
| 5 C  | 7.8574 | 0.1452  | 13.8320 C.2 | 1 UNL1 | 0.0993  |
| 6 H  | 3.9134 | -2.0654 | 10.1081 H   | 1 UNL1 | 0.1468  |
| 7 H  | 4.5968 | -3.6625 | 10.4414 H   | 1 UNL1 | 0.1478  |
| 8 H  | 8.5520 | -0.8074 | 15.6348 H   | 1 UNL1 | 0.1601  |
| 9 H  | 8.3660 | -1.8846 | 14.2402 H   | 1 UNL1 | 0.1660  |
| 10 H | 9.7343 | -0.7651 | 14.3189 H   | 1 UNL1 | 0.1646  |
| 11 H | 7.3062 | 4.1078  | 9.9164 H    | 1 UNL1 | 0.1482  |
| 12 H | 6.2935 | 4.0757  | 11.3586 H   | 1 UNL1 | 0.1516  |
| 13 H | 8.0319 | 3.7886  | 11.4953 H   | 1 UNL1 | 0.1555  |
| 14 C | 7.0206 | 1.0714  | 14.3408 C.2 | 1 UNL1 | -0.2575 |
| 15 H | 4.6285 | -2.4078 | 11.6838 H   | 1 UNL1 | 0.1531  |
| 16 H | 7.2379 | -2.8319 | 11.8155 H   | 1 UNL1 | 0.1579  |
| 17 H | 8.2061 | -2.6531 | 10.3572 H   | 1 UNL1 | 0.1463  |
| 18 H | 7.0974 | -4.0203 | 10.5143 H   | 1 UNL1 | 0.1456  |
| 19 H | 6.1157 | -2.3111 | 8.9814 H    | 1 UNL1 | 0.1084  |
| 20 H | 7.8300 | 1.7167  | 10.0970 H   | 1 UNL1 | 0.1239  |
| 21 H | 4.8098 | 2.3029  | 10.3088 H   | 1 UNL1 | 0.1349  |
| 22 H | 5.7835 | 2.3180  | 8.8381 H    | 1 UNL1 | 0.1272  |
| 23 H | 4.3535 | 0.1038  | 10.0026 H   | 1 UNL1 | 0.1358  |
| 24 H | 5.3216 | 0.0963  | 8.5278 H    | 1 UNL1 | 0.1256  |
| 25 H | 7.3825 | -0.4339 | 9.7910 H    | 1 UNL1 | 0.1259  |
| 26 H | 5.2569 | 1.8954  | 13.3473 H   | 1 UNL1 | 0.1440  |
| 27 H | 6.6707 | 2.9710  | 13.3587 H   | 1 UNL1 | 0.1461  |
| 28 H | 8.7661 | -0.0160 | 11.7994 H   | 1 UNL1 | 0.1562  |
| 29 H | 6.7980 | 1.2557  | 15.3736 H   | 1 UNL1 | 0.1478  |
| 30 C | 7.1498 | 3.5973  | 10.8725 C.3 | 1 UNL1 | -0.4917 |

|                   |        |         |              |        |         |
|-------------------|--------|---------|--------------|--------|---------|
| 31 C              | 8.6642 | -0.8700 | 14.5456 C.3  | 1 UNL1 | -0.4906 |
| 32 C              | 4.7348 | -2.5864 | 10.6088 C.3  | 1 UNL1 | -0.4916 |
| 33 C              | 7.2204 | -2.9539 | 10.7258 C.3  | 1 UNL1 | -0.4947 |
| 34 C              | 6.0972 | -2.1233 | 10.0853 C.3  | 1 UNL1 | -0.0024 |
| 35 H              | 5.7566 | -0.6722 | 12.3977 H    | 1 UNL1 | 0.1548  |
| 36 C              | 6.9411 | 2.0957  | 10.6668 C.3  | 1 UNL1 | -0.0309 |
| 37 C              | 5.6752 | 1.8196  | 9.8175 C.3   | 1 UNL1 | -0.2822 |
| 38 C              | 5.3644 | 0.3207  | 9.6069 C.3   | 1 UNL1 | -0.2742 |
| 39 C              | 6.3906 | -0.6131 | 10.2865 C.3  | 1 UNL1 | -0.0985 |
| @<TRIPOS>BOND     |        |         |              |        |         |
| 1                 | 24     | 38      | 1            |        |         |
| 2                 | 22     | 37      | 1            |        |         |
| 3                 | 19     | 34      | 1            |        |         |
| 4                 | 38     | 37      | 1            |        |         |
| 5                 | 38     | 23      | 1            |        |         |
| 6                 | 38     | 39      | 1            |        |         |
| 7                 | 25     | 39      | 1            |        |         |
| 8                 | 37     | 21      | 1            |        |         |
| 9                 | 37     | 36      | 1            |        |         |
| 10                | 11     | 30      | 1            |        |         |
| 11                | 34     | 39      | 1            |        |         |
| 12                | 34     | 32      | 1            |        |         |
| 13                | 34     | 33      | 1            |        |         |
| 14                | 20     | 36      | 1            |        |         |
| 15                | 6      | 32      | 1            |        |         |
| 16                | 39     | 3       | 1            |        |         |
| 17                | 17     | 33      | 1            |        |         |
| 18                | 7      | 32      | 1            |        |         |
| 19                | 18     | 33      | 1            |        |         |
| 20                | 32     | 15      | 1            |        |         |
| 21                | 36     | 30      | 1            |        |         |
| 22                | 36     | 2       | 1            |        |         |
| 23                | 33     | 16      | 1            |        |         |
| 24                | 30     | 12      | 1            |        |         |
| 25                | 30     | 13      | 1            |        |         |
| 26                | 3      | 2       | 1            |        |         |
| 27                | 3      | 4       | 1            |        |         |
| 28                | 3      | 35      | 1            |        |         |
| 29                | 28     | 4       | 1            |        |         |
| 30                | 2      | 4       | 1            |        |         |
| 31                | 2      | 1       | 1            |        |         |
| 32                | 4      | 5       | 1            |        |         |
| 33                | 1      | 26      | 1            |        |         |
| 34                | 1      | 27      | 1            |        |         |
| 35                | 1      | 14      | 1            |        |         |
| 36                | 5      | 14      | 2            |        |         |
| 37                | 5      | 31      | 1            |        |         |
| 38                | 9      | 31      | 1            |        |         |
| 39                | 10     | 31      | 1            |        |         |
| 40                | 14     | 29      | 1            |        |         |
| 41                | 31     | 8       | 1            |        |         |
| Compound 25       |        |         |              |        |         |
| @<TRIPOS>MOLECULE |        |         |              |        |         |
| compuesto_25.out  |        |         |              |        |         |
| 39 42 0 0 0       |        |         |              |        |         |
| SMALL             |        |         |              |        |         |
| MULLIKEN_CHARGES  |        |         |              |        |         |
| @<TRIPOS>ATOM     |        |         |              |        |         |
| 1 H               | 3.1536 | 0.0169  | -16.6099 H   | 1 UNL1 | 0.1522  |
| 2 H               | 4.3486 | 1.2843  | -16.8872 H   | 1 UNL1 | 0.1466  |
| 3 H               | 5.2422 | -2.3682 | -17.0259 H   | 1 UNL1 | 0.1458  |
| 4 H               | 5.6828 | -2.5405 | -15.3207 H   | 1 UNL1 | 0.1478  |
| 5 H               | 3.9855 | -2.3354 | -15.7882 H   | 1 UNL1 | 0.1569  |
| 6 C               | 3.6722 | -1.7111 | -13.0240 C.3 | 1 UNL1 | -0.2306 |

|               |        |         |              |        |         |
|---------------|--------|---------|--------------|--------|---------|
| 7 H           | 5.8202 | -0.5555 | -13.8503 H   | 1 UNL1 | 0.1323  |
| 8 H           | 6.2535 | 1.7362  | -14.8159 H   | 1 UNL1 | 0.1279  |
| 9 H           | 4.5129 | 2.0599  | -14.8507 H   | 1 UNL1 | 0.1366  |
| 10 H          | 6.1423 | 1.3660  | -12.3136 H   | 1 UNL1 | 0.1372  |
| 11 H          | 5.6456 | 2.9976  | -12.7877 H   | 1 UNL1 | 0.1279  |
| 12 H          | 1.8544 | 0.2108  | -10.8462 H   | 1 UNL1 | 0.1424  |
| 13 H          | 3.2462 | 2.3837  | -12.6331 H   | 1 UNL1 | 0.1257  |
| 14 H          | 2.8224 | -0.1747 | -14.4354 H   | 1 UNL1 | 0.1308  |
| 15 H          | 1.2915 | 0.0336  | -12.5190 H   | 1 UNL1 | 0.1394  |
| 16 H          | 2.2323 | -2.4177 | -11.3449 H   | 1 UNL1 | 0.1501  |
| 17 H          | 3.9373 | -2.6436 | -13.4697 H   | 1 UNL1 | 0.1543  |
| 18 C          | 4.0858 | 2.1142  | -10.6620 C.3 | 1 UNL1 | -0.4854 |
| 19 C          | 5.0119 | -2.0197 | -16.0128 C.3 | 1 UNL1 | -0.4968 |
| 20 C          | 4.2008 | 0.1994  | -16.8758 C.3 | 1 UNL1 | -0.4928 |
| 21 C          | 5.1616 | -0.4966 | -15.9042 C.3 | 1 UNL1 | -0.0034 |
| 22 C          | 5.2565 | -1.3168 | -10.8107 C.3 | 1 UNL1 | -0.4585 |
| 23 C          | 4.1371 | -1.0463 | -11.7216 C.3 | 1 UNL1 | 0.0158  |
| 24 C          | 5.0205 | -0.0241 | -14.4315 C.3 | 1 UNL1 | -0.1144 |
| 25 C          | 5.2983 | 1.4895  | -14.3152 C.3 | 1 UNL1 | -0.2779 |
| 26 C          | 5.3566 | 1.9328  | -12.8478 C.3 | 1 UNL1 | -0.2790 |
| 27 C          | 4.0040 | 1.7200  | -12.1384 C.3 | 1 UNL1 | -0.0518 |
| 28 C          | 3.6759 | -0.3539 | -13.7671 C.3 | 1 UNL1 | -0.1040 |
| 29 C          | 3.5410 | 0.3042  | -12.3307 C.3 | 1 UNL1 | 0.0429  |
| 30 C          | 2.1243 | -0.1570 | -11.8411 C.3 | 1 UNL1 | -0.3090 |
| 31 C          | 2.7016 | -1.5829 | -11.8155 C.3 | 1 UNL1 | -0.1914 |
| 32 H          | 6.2050 | -0.9237 | -11.2048 H   | 1 UNL1 | 0.1603  |
| 33 H          | 5.0888 | -0.8641 | -9.8226 H    | 1 UNL1 | 0.1596  |
| 34 H          | 5.3937 | -2.3987 | -10.6534 H   | 1 UNL1 | 0.1574  |
| 35 H          | 6.2091 | -0.2387 | -16.2171 H   | 1 UNL1 | 0.1079  |
| 36 H          | 4.3436 | -0.1631 | -17.9009 H   | 1 UNL1 | 0.1470  |
| 37 H          | 3.1082 | 2.0285  | -10.1737 H   | 1 UNL1 | 0.1499  |
| 38 H          | 4.7808 | 1.4663  | -10.1170 H   | 1 UNL1 | 0.1539  |
| 39 H          | 4.4237 | 3.1487  | -10.5434 H   | 1 UNL1 | 0.1464  |
| @<TRIPOS>BOND |        |         |              |        |         |
| 1             | 36     | 20      | 1            |        |         |
| 2             | 3      | 19      | 1            |        |         |
| 3             | 2      | 20      | 1            |        |         |
| 4             | 20     | 1       | 1            |        |         |
| 5             | 20     | 21      | 1            |        |         |
| 6             | 35     | 21      | 1            |        |         |
| 7             | 19     | 21      | 1            |        |         |
| 8             | 19     | 5       | 1            |        |         |
| 9             | 19     | 4       | 1            |        |         |
| 10            | 21     | 24      | 1            |        |         |
| 11            | 9      | 25      | 1            |        |         |
| 12            | 8      | 25      | 1            |        |         |
| 13            | 14     | 28      | 1            |        |         |
| 14            | 24     | 25      | 1            |        |         |
| 15            | 24     | 7       | 1            |        |         |
| 16            | 24     | 28      | 1            |        |         |
| 17            | 25     | 26      | 1            |        |         |
| 18            | 28     | 6       | 1            |        |         |
| 19            | 28     | 29      | 1            |        |         |
| 20            | 17     | 6       | 1            |        |         |
| 21            | 6      | 31      | 1            |        |         |
| 22            | 6      | 23      | 1            |        |         |
| 23            | 26     | 11      | 1            |        |         |
| 24            | 26     | 10      | 1            |        |         |
| 25            | 26     | 27      | 1            |        |         |
| 26            | 13     | 27      | 1            |        |         |
| 27            | 15     | 30      | 1            |        |         |
| 28            | 29     | 27      | 1            |        |         |
| 29            | 29     | 30      | 1            |        |         |
| 30            | 29     | 23      | 1            |        |         |
| 31            | 27     | 18      | 1            |        |         |
| 32            | 30     | 31      | 1            |        |         |



33 30 12 1  
 34 31 23 1  
 35 31 16 1  
 36 23 22 1  
 37 32 22 1  
 38 22 34 1  
 39 22 33 1  
 40 18 39 1  
 41 18 37 1  
 42 18 38 1

## Compound 26

@<TRIPOS>MOLECULE

compuesto\_26.out

33 35 0 0 0

SMALL

MULLIKEN\_CHARGES

@<TRIPOS>ATOM

|      |        |         |              |        |         |
|------|--------|---------|--------------|--------|---------|
| 1 C  | 4.8432 | 0.8433  | -16.5720 C.2 | 1 UNL1 | -0.2534 |
| 2 C  | 3.7283 | -0.1352 | -16.2996 C.3 | 1 UNL1 | -0.2527 |
| 3 C  | 3.7060 | -0.5343 | -14.8089 C.3 | 1 UNL1 | -0.1393 |
| 4 C  | 5.1574 | -0.8901 | -14.3339 C.3 | 1 UNL1 | -0.1270 |
| 5 C  | 5.3597 | 0.6602  | -14.1828 C.3 | 1 UNL1 | -0.2046 |
| 6 C  | 5.6272 | 1.2430  | -15.5519 C.2 | 1 UNL1 | 0.0845  |
| 7 C  | 5.2112 | -1.6027 | -12.9680 C.3 | 1 UNL1 | -0.0374 |
| 8 C  | 4.0018 | -1.1898 | -12.0992 C.3 | 1 UNL1 | -0.2794 |
| 9 C  | 3.6206 | 0.2778  | -12.3579 C.3 | 1 UNL1 | -0.3136 |
| 10 C | 3.8247 | 0.6955  | -13.8368 C.3 | 1 UNL1 | 0.1579  |
| 11 C | 6.7442 | 2.2225  | -15.6917 C.3 | 1 UNL1 | -0.4979 |
| 12 C | 3.0686 | 1.9656  | -14.1575 C.3 | 1 UNL1 | -0.5204 |
| 13 C | 5.2752 | -3.1233 | -13.1369 C.3 | 1 UNL1 | -0.4960 |
| 14 H | 2.9208 | -1.2579 | -14.5761 H   | 1 UNL1 | 0.1273  |
| 15 H | 6.0466 | 0.9924  | -13.4003 H   | 1 UNL1 | 0.1361  |
| 16 H | 5.8087 | -1.3593 | -15.0795 H   | 1 UNL1 | 0.1331  |
| 17 H | 4.9714 | 1.2064  | -17.5871 H   | 1 UNL1 | 0.1430  |
| 18 H | 2.7538 | 0.3076  | -16.5874 H   | 1 UNL1 | 0.1378  |
| 19 H | 3.8658 | -1.0459 | -16.9175 H   | 1 UNL1 | 0.1366  |
| 20 H | 6.1468 | -1.2706 | -12.4511 H   | 1 UNL1 | 0.1172  |
| 21 H | 3.1343 | -1.8340 | -12.3467 H   | 1 UNL1 | 0.1345  |
| 22 H | 4.2091 | -1.3596 | -11.0247 H   | 1 UNL1 | 0.1277  |
| 23 H | 2.5650 | 0.4324  | -12.0679 H   | 1 UNL1 | 0.1357  |
| 24 H | 4.2314 | 0.9448  | -11.7173 H   | 1 UNL1 | 0.1373  |
| 25 H | 6.5749 | 3.1025  | -15.0536 H   | 1 UNL1 | 0.1628  |
| 26 H | 7.7025 | 1.7677  | -15.4010 H   | 1 UNL1 | 0.1634  |
| 27 H | 6.8358 | 2.5921  | -16.7344 H   | 1 UNL1 | 0.1589  |
| 28 H | 1.9863 | 1.8170  | -14.0662 H   | 1 UNL1 | 0.1530  |
| 29 H | 3.3655 | 2.7736  | -13.4736 H   | 1 UNL1 | 0.1533  |
| 30 H | 3.2603 | 2.3310  | -15.1788 H   | 1 UNL1 | 0.1696  |
| 31 H | 5.2918 | -3.6313 | -12.1616 H   | 1 UNL1 | 0.1485  |
| 32 H | 4.4024 | -3.4974 | -13.6982 H   | 1 UNL1 | 0.1535  |
| 33 H | 6.1776 | -3.4214 | -13.6893 H   | 1 UNL1 | 0.1500  |

@<TRIPOS>BOND

1 17 1 1  
 2 19 2 1  
 3 27 11 1  
 4 18 2 1  
 5 1 2 1  
 6 1 6 2  
 7 2 3 1  
 8 11 6 1  
 9 11 26 1  
 10 11 25 1  
 11 6 5 1  
 12 30 12 1  
 13 16 4 1

14 3 14 1  
 15 3 4 1  
 16 3 10 1  
 17 4 5 1  
 18 4 7 1  
 19 5 10 1  
 20 5 15 1  
 21 12 28 1  
 22 12 10 1  
 23 12 29 1  
 24 10 9 1  
 25 32 13 1  
 26 33 13 1  
 27 13 7 1  
 28 13 31 1  
 29 7 20 1  
 30 7 8 1  
 31 9 8 1  
 32 9 23 1  
 33 9 24 1  
 34 21 8 1  
 35 8 22 1

## Compound 27

@<TRIPOS>MOLECULE

compuesto\_27.out

39 41 0 0 0

SMALL

MULLIKEN\_CHARGES

@<TRIPOS>ATOM

|      |        |         |              |        |         |
|------|--------|---------|--------------|--------|---------|
| 1 C  | 2.2567 | -0.0098 | -9.9242 C.3  | 1 UNL1 | -0.2972 |
| 2 C  | 3.7951 | -0.0607 | -10.1895 C.3 | 1 UNL1 | 0.1190  |
| 3 C  | 3.9897 | -0.8787 | -11.4462 C.2 | 1 UNL1 | -0.0720 |
| 4 H  | 3.9940 | 3.4228  | -9.6290 H    | 1 UNL1 | 0.1489  |
| 5 H  | 5.7580 | 0.9299  | -11.9331 H   | 1 UNL1 | 0.1643  |
| 6 H  | 6.2850 | 1.5388  | -10.3741 H   | 1 UNL1 | 0.1502  |
| 7 H  | 5.6187 | 2.6525  | -11.5770 H   | 1 UNL1 | 0.1487  |
| 8 H  | 2.2961 | 0.9630  | -13.5120 H   | 1 UNL1 | 0.1421  |
| 9 H  | 3.9514 | 1.5875  | -13.5160 H   | 1 UNL1 | 0.1398  |
| 10 H | 1.0129 | 0.6835  | -11.5946 H   | 1 UNL1 | 0.1324  |
| 11 H | 1.1752 | 1.8657  | -10.2913 H   | 1 UNL1 | 0.1237  |
| 12 H | 2.0463 | 0.2186  | -8.8679 H    | 1 UNL1 | 0.1294  |
| 13 H | 1.7852 | -0.9811 | -10.1338 H   | 1 UNL1 | 0.1362  |
| 14 H | 2.8147 | 2.7950  | -11.7446 H   | 1 UNL1 | 0.1167  |
| 15 C | 3.1114 | -1.4662 | -14.9220 C.3 | 1 UNL1 | -0.4870 |
| 16 C | 4.4080 | -2.3246 | -11.4960 C.3 | 1 UNL1 | -0.2619 |
| 17 C | 4.2982 | -2.7058 | -12.9949 C.3 | 1 UNL1 | -0.2851 |
| 18 C | 4.1060 | -1.3657 | -13.7696 C.3 | 1 UNL1 | -0.0359 |
| 19 C | 4.5879 | -0.5891 | -9.0003 C.3  | 1 UNL1 | -0.5055 |
| 20 C | 3.9937 | 2.3715  | -9.3292 C.3  | 1 UNL1 | -0.5165 |
| 21 C | 5.5184 | 1.6521  | -11.1463 C.3 | 1 UNL1 | -0.5157 |
| 22 C | 3.2288 | 1.0036  | -12.9152 C.3 | 1 UNL1 | -0.2853 |
| 23 C | 3.7421 | -0.3792 | -12.6763 C.2 | 1 UNL1 | -0.0438 |
| 24 C | 4.1228 | 1.4458  | -10.5521 C.3 | 1 UNL1 | 0.1603  |
| 25 C | 2.9584 | 1.7151  | -11.5666 C.3 | 1 UNL1 | -0.1066 |
| 26 C | 1.7211 | 1.0966  | -10.8604 C.3 | 1 UNL1 | -0.2710 |
| 27 H | 3.0734 | 2.1961  | -8.7647 H    | 1 UNL1 | 0.1549  |
| 28 H | 4.8294 | 2.2282  | -8.6367 H    | 1 UNL1 | 0.1508  |
| 29 H | 4.5146 | 0.0796  | -8.1355 H    | 1 UNL1 | 0.1539  |
| 30 H | 4.2290 | -1.5720 | -8.6820 H    | 1 UNL1 | 0.1506  |
| 31 H | 5.6512 | -0.6822 | -9.2455 H    | 1 UNL1 | 0.1555  |
| 32 H | 5.0940 | -1.0482 | -14.1900 H   | 1 UNL1 | 0.1200  |
| 33 H | 3.4399 | -3.3766 | -13.1584 H   | 1 UNL1 | 0.1350  |
| 34 H | 5.1856 | -3.2528 | -13.3418 H   | 1 UNL1 | 0.1272  |
| 35 H | 5.4329 | -2.4696 | -11.1150 H   | 1 UNL1 | 0.1368  |

|                   |        |         |              |        |         |
|-------------------|--------|---------|--------------|--------|---------|
| 36 H              | 3.7446 | -2.9492 | -10.8740 H   | 1 UNL1 | 0.1363  |
| 37 H              | 2.8181 | -0.4767 | -15.2922 H   | 1 UNL1 | 0.1505  |
| 38 H              | 3.5492 | -2.0093 | -15.7675 H   | 1 UNL1 | 0.1463  |
| 39 H              | 2.1931 | -1.9871 | -14.6292 H   | 1 UNL1 | 0.1542  |
| @<TRIPOS>BOND     |        |         |              |        |         |
| 1                 | 38     | 15      | 1            |        |         |
| 2                 | 37     | 15      | 1            |        |         |
| 3                 | 15     | 39      | 1            |        |         |
| 4                 | 15     | 18      | 1            |        |         |
| 5                 | 32     | 18      | 1            |        |         |
| 6                 | 18     | 17      | 1            |        |         |
| 7                 | 18     | 23      | 1            |        |         |
| 8                 | 9      | 22      | 1            |        |         |
| 9                 | 8      | 22      | 1            |        |         |
| 10                | 34     | 17      | 1            |        |         |
| 11                | 33     | 17      | 1            |        |         |
| 12                | 17     | 16      | 1            |        |         |
| 13                | 22     | 23      | 1            |        |         |
| 14                | 22     | 25      | 1            |        |         |
| 15                | 23     | 3       | 2            |        |         |
| 16                | 5      | 21      | 1            |        |         |
| 17                | 14     | 25      | 1            |        |         |
| 18                | 10     | 26      | 1            |        |         |
| 19                | 7      | 21      | 1            |        |         |
| 20                | 25     | 26      | 1            |        |         |
| 21                | 25     | 24      | 1            |        |         |
| 22                | 16     | 3       | 1            |        |         |
| 23                | 16     | 35      | 1            |        |         |
| 24                | 16     | 36      | 1            |        |         |
| 25                | 3      | 2       | 1            |        |         |
| 26                | 21     | 24      | 1            |        |         |
| 27                | 21     | 6       | 1            |        |         |
| 28                | 26     | 11      | 1            |        |         |
| 29                | 26     | 1       | 1            |        |         |
| 30                | 24     | 2       | 1            |        |         |
| 31                | 24     | 20      | 1            |        |         |
| 32                | 2      | 1       | 1            |        |         |
| 33                | 2      | 19      | 1            |        |         |
| 34                | 13     | 1       | 1            |        |         |
| 35                | 1      | 12      | 1            |        |         |
| 36                | 4      | 20      | 1            |        |         |
| 37                | 20     | 27      | 1            |        |         |
| 38                | 20     | 28      | 1            |        |         |
| 39                | 31     | 19      | 1            |        |         |
| 40                | 19     | 30      | 1            |        |         |
| 41                | 19     | 29      | 1            |        |         |
| Compound 28       |        |         |              |        |         |
| @<TRIPOS>MOLECULE |        |         |              |        |         |
| compuesto_28.out  |        |         |              |        |         |
| 39 41 0 0 0       |        |         |              |        |         |
| SMALL             |        |         |              |        |         |
| MULLIKEN_CHARGES  |        |         |              |        |         |
| @<TRIPOS>ATOM     |        |         |              |        |         |
| 1 C               | 3.0361 | -0.0293 | -10.7759 C.3 | 1 UNL1 | -0.1418 |
| 2 H               | 5.4735 | 0.5083  | -12.7711 H   | 1 UNL1 | 0.1374  |
| 3 H               | 3.8354 | 2.7116  | -9.7469 H    | 1 UNL1 | 0.1482  |
| 4 H               | 5.4220 | 2.2914  | -10.4105 H   | 1 UNL1 | 0.1448  |
| 5 H               | 5.1128 | -0.0199 | -10.0750 H   | 1 UNL1 | 0.1413  |
| 6 H               | 3.9450 | 0.5079  | -8.8561 H    | 1 UNL1 | 0.1275  |
| 7 C               | 4.3488 | -0.9404 | -15.7417 C.3 | 1 UNL1 | -0.4929 |
| 8 C               | 5.1187 | 1.4085  | -15.2497 C.3 | 1 UNL1 | -0.4957 |
| 9 C               | 3.9170 | 3.0983  | -12.6754 C.2 | 1 UNL1 | -0.4742 |
| 10 H              | 2.1146 | -0.1300 | -10.1847 H   | 1 UNL1 | 0.1262  |
| 11 H              | 1.8847 | 1.1599  | -12.3070 H   | 1 UNL1 | 0.1386  |

|               |        |         |              |        |         |
|---------------|--------|---------|--------------|--------|---------|
| 12 H          | 2.7897 | -0.4993 | -13.7835 H   | 1 UNL1 | 0.1319  |
| 13 C          | 2.1390 | -2.2119 | -11.7731 C.3 | 1 UNL1 | -0.5184 |
| 14 C          | 5.2332 | -0.0666 | -14.8447 C.3 | 1 UNL1 | -0.0051 |
| 15 C          | 4.6571 | -1.9989 | -11.5726 C.3 | 1 UNL1 | -0.3099 |
| 16 C          | 5.4398 | -1.6711 | -12.8556 C.3 | 1 UNL1 | -0.2725 |
| 17 C          | 4.9324 | -0.2873 | -13.3435 C.3 | 1 UNL1 | -0.1070 |
| 18 C          | 3.3205 | -1.2576 | -11.7031 C.3 | 1 UNL1 | 0.1291  |
| 19 C          | 3.4481 | -0.2744 | -12.9334 C.3 | 1 UNL1 | -0.1363 |
| 20 C          | 2.9194 | 0.8839  | -12.0437 C.3 | 1 UNL1 | -0.1784 |
| 21 C          | 3.7665 | 2.1003  | -11.8079 C.2 | 1 UNL1 | 0.1459  |
| 22 C          | 4.3601 | 2.0075  | -10.4172 C.3 | 1 UNL1 | -0.3063 |
| 23 C          | 4.1754 | 0.5540  | -9.9304 C.3  | 1 UNL1 | -0.2607 |
| 24 H          | 5.2375 | -2.4492 | -13.6150 H   | 1 UNL1 | 0.1327  |
| 25 H          | 6.5244 | -1.6691 | -12.6853 H   | 1 UNL1 | 0.1253  |
| 26 H          | 5.2053 | -1.6682 | -10.6714 H   | 1 UNL1 | 0.1385  |
| 27 H          | 4.5204 | -3.0860 | -11.4589 H   | 1 UNL1 | 0.1359  |
| 28 H          | 6.3000 | -0.3709 | -15.0142 H   | 1 UNL1 | 0.1097  |
| 29 H          | 2.2923 | -2.9626 | -12.5570 H   | 1 UNL1 | 0.1576  |
| 30 H          | 1.9936 | -2.7415 | -10.8241 H   | 1 UNL1 | 0.1548  |
| 31 H          | 1.2024 | -1.6939 | -12.0046 H   | 1 UNL1 | 0.1545  |
| 32 H          | 3.4562 | 3.0982  | -13.6555 H   | 1 UNL1 | 0.1640  |
| 33 H          | 4.5132 | 3.9753  | -12.5014 H   | 1 UNL1 | 0.1588  |
| 34 H          | 5.3822 | 1.5490  | -16.3031 H   | 1 UNL1 | 0.1449  |
| 35 H          | 4.1028 | 1.7944  | -15.1104 H   | 1 UNL1 | 0.1555  |
| 36 H          | 5.7869 | 2.0453  | -14.6587 H   | 1 UNL1 | 0.1515  |
| 37 H          | 4.6029 | -0.8144 | -16.7967 H   | 1 UNL1 | 0.1459  |
| 38 H          | 4.4599 | -2.0009 | -15.4933 H   | 1 UNL1 | 0.1472  |
| 39 H          | 3.2874 | -0.6896 | -15.6228 H   | 1 UNL1 | 0.1517  |
| @<TRIPOS>BOND |        |         |              |        |         |
| 1             | 37     | 7       | 1            |        |         |
| 2             | 34     | 8       | 1            |        |         |
| 3             | 7      | 39      | 1            |        |         |
| 4             | 7      | 38      | 1            |        |         |
| 5             | 7      | 14      | 1            |        |         |
| 6             | 8      | 35      | 1            |        |         |
| 7             | 8      | 14      | 1            |        |         |
| 8             | 8      | 36      | 1            |        |         |
| 9             | 28     | 14      | 1            |        |         |
| 10            | 14     | 17      | 1            |        |         |
| 11            | 12     | 19      | 1            |        |         |
| 12            | 32     | 9       | 1            |        |         |
| 13            | 24     | 16      | 1            |        |         |
| 14            | 17     | 19      | 1            |        |         |
| 15            | 17     | 16      | 1            |        |         |
| 16            | 17     | 2       | 1            |        |         |
| 17            | 19     | 20      | 1            |        |         |
| 18            | 19     | 18      | 1            |        |         |
| 19            | 16     | 25      | 1            |        |         |
| 20            | 16     | 15      | 1            |        |         |
| 21            | 9      | 33      | 1            |        |         |
| 22            | 9      | 21      | 2            |        |         |
| 23            | 29     | 13      | 1            |        |         |
| 24            | 11     | 20      | 1            |        |         |
| 25            | 20     | 21      | 1            |        |         |
| 26            | 20     | 1       | 1            |        |         |
| 27            | 31     | 13      | 1            |        |         |
| 28            | 21     | 22      | 1            |        |         |
| 29            | 13     | 18      | 1            |        |         |
| 30            | 13     | 30      | 1            |        |         |
| 31            | 18     | 15      | 1            |        |         |
| 32            | 18     | 1       | 1            |        |         |
| 33            | 15     | 27      | 1            |        |         |
| 34            | 15     | 26      | 1            |        |         |
| 35            | 1      | 10      | 1            |        |         |
| 36            | 1      | 23      | 1            |        |         |
| 37            | 22     | 4       | 1            |        |         |

|    |    |    |   |
|----|----|----|---|
| 38 | 22 | 23 | 1 |
| 39 | 22 | 3  | 1 |
| 40 | 5  | 23 | 1 |
| 41 | 23 | 6  | 1 |

Compound 29

@<TRIPOS>MOLECULE  
compuesto\_29.out  
39 39 0 0 0  
SMALL  
MULLIKEN\_CHARGES

@<TRIPOS>ATOM  
1 C 5.0709 0.5780 -14.1253 C.3 1 UNL1 -0.1716  
2 C 4.4913 1.4051 -12.9262 C.3 1 UNL1 0.1658  
3 C 5.3103 2.7070 -12.7746 C.3 1 UNL1 -0.5169  
4 C 3.0068 1.7044 -13.0424 C.2 1 UNL1 -0.1178  
5 C 2.3313 2.5335 -12.2428 C.2 1 UNL1 -0.3713  
6 C 3.8219 -2.9669 -13.0719 C.2 1 UNL1 0.1280  
7 C 2.5067 -3.0969 -13.2796 C.2 1 UNL1 -0.4444  
8 C 4.7158 -4.1683 -12.9414 C.3 1 UNL1 -0.5111  
9 C 5.1661 1.2764 -15.4729 C.2 1 UNL1 0.1495  
10 C 4.3039 2.1889 -15.9333 C.2 1 UNL1 -0.4547  
11 C 6.3390 0.8461 -16.3187 C.3 1 UNL1 -0.5156  
12 H 6.1334 0.3684 -13.8275 H 1 UNL1 0.1378  
13 H 3.3306 -0.6842 -14.5598 H 1 UNL1 0.1456  
14 H 4.8706 -1.3840 -15.0705 H 1 UNL1 0.1327  
15 H 5.5982 -1.7898 -12.7697 H 1 UNL1 0.1281  
16 H 2.8790 -0.6618 -11.8325 H 1 UNL1 0.1448  
17 H 4.1301 -1.3914 -10.8158 H 1 UNL1 0.1290  
18 H 4.3034 1.0930 -10.7575 H 1 UNL1 0.1397  
19 H 5.7640 0.3865 -11.4563 H 1 UNL1 0.1339  
20 H 6.3927 2.5075 -12.7563 H 1 UNL1 0.1499  
21 H 5.1221 3.4007 -13.6068 H 1 UNL1 0.1665  
22 C 4.6831 0.5445 -11.6422 C.3 1 UNL1 -0.3086  
23 C 3.9744 -0.8125 -11.7472 C.3 1 UNL1 -0.2604  
24 C 4.5059 -1.6145 -12.9510 C.3 1 UNL1 -0.1147  
25 C 4.3881 -0.8033 -14.2599 C.3 1 UNL1 -0.2701  
26 H 5.0683 3.2420 -11.8425 H 1 UNL1 0.1534  
27 H 2.4650 1.1725 -13.8287 H 1 UNL1 0.1402  
28 H 1.2732 2.7057 -12.3534 H 1 UNL1 0.1473  
29 H 2.7926 3.0822 -11.4334 H 1 UNL1 0.1493  
30 H 2.0257 -4.0636 -13.3629 H 1 UNL1 0.1571  
31 H 1.8447 -2.2527 -13.3780 H 1 UNL1 0.1597  
32 H 5.2107 -4.1822 -11.9592 H 1 UNL1 0.1636  
33 H 4.1713 -5.1169 -13.0363 H 1 UNL1 0.1626  
34 H 5.4936 -4.1666 -13.7252 H 1 UNL1 0.1633  
35 H 4.4076 2.6461 -16.9036 H 1 UNL1 0.1556  
36 H 3.4398 2.5314 -15.3817 H 1 UNL1 0.1662  
37 H 6.3116 -0.2369 -16.5186 H 1 UNL1 0.1626  
38 H 6.3594 1.3606 -17.3024 H 1 UNL1 0.1635  
39 H 7.2947 1.0741 -15.8227 H 1 UNL1 0.1611

@<TRIPOS>BOND  
1 38 11 1  
2 35 10 1  
3 37 11 1  
4 11 39 1  
5 11 9 1  
6 10 9 2  
7 10 36 1  
8 9 1 1  
9 14 25 1  
10 13 25 1  
11 25 1 1  
12 25 24 1  
13 1 12 1

14 1 2 1  
 15 27 4 1  
 16 34 8 1  
 17 21 3 1  
 18 31 7 1  
 19 30 7 1  
 20 7 6 2  
 21 6 24 1  
 22 6 8 1  
 23 4 2 1  
 24 4 5 2  
 25 33 8 1  
 26 24 15 1  
 27 24 23 1  
 28 8 32 1  
 29 2 3 1  
 30 2 22 1  
 31 3 20 1  
 32 3 26 1  
 33 28 5 1  
 34 5 29 1  
 35 16 23 1  
 36 23 22 1  
 37 23 17 1  
 38 22 19 1  
 39 22 18 1

### Compound 30

@<TRIPOS>MOLECULE  
 compuesto\_30.out  
 39 40 0 0 0  
 SMALL  
 MULLIKEN\_CHARGES

@<TRIPOS>ATOM

|      |        |         |              |        |         |
|------|--------|---------|--------------|--------|---------|
| 1 C  | 5.2284 | 0.7420  | -15.5513 C.3 | 1 UNL1 | 0.1899  |
| 2 C  | 4.6275 | -0.6908 | -15.6962 C.3 | 1 UNL1 | -0.3571 |
| 3 C  | 3.9053 | -0.4950 | -14.3353 C.3 | 1 UNL1 | -0.1361 |
| 4 C  | 4.9218 | 0.6506  | -14.0060 C.3 | 1 UNL1 | -0.1346 |
| 5 C  | 4.0370 | 0.4934  | -11.3172 C.3 | 1 UNL1 | 0.1255  |
| 6 C  | 4.5003 | 1.8558  | -11.7691 C.3 | 1 UNL1 | -0.3112 |
| 7 C  | 4.4180 | 1.9124  | -13.3114 C.3 | 1 UNL1 | -0.2535 |
| 8 C  | 2.5616 | 0.3052  | -11.2299 C.3 | 1 UNL1 | -0.4941 |
| 9 C  | 4.9684 | -0.4646 | -11.1647 C.3 | 1 UNL1 | -0.2786 |
| 10 C | 4.7141 | -1.9345 | -11.2229 C.3 | 1 UNL1 | -0.2117 |
| 11 C | 4.8012 | -2.3510 | -12.7104 C.3 | 1 UNL1 | -0.3030 |
| 12 C | 3.6901 | -1.7409 | -13.5286 C.2 | 1 UNL1 | 0.1423  |
| 13 C | 2.4897 | -2.3333 | -13.5696 C.2 | 1 UNL1 | -0.4707 |
| 14 C | 4.3980 | 1.7790  | -16.3078 C.3 | 1 UNL1 | -0.5156 |
| 15 C | 6.6990 | 0.8691  | -15.9077 C.3 | 1 UNL1 | -0.5242 |
| 16 H | 5.8063 | 0.2592  | -13.4625 H   | 1 UNL1 | 0.1431  |
| 17 H | 2.9034 | -0.0274 | -14.4988 H   | 1 UNL1 | 0.1360  |
| 18 H | 3.9938 | -0.8762 | -16.5595 H   | 1 UNL1 | 0.1426  |
| 19 H | 5.3900 | -1.4788 | -15.6819 H   | 1 UNL1 | 0.1458  |
| 20 H | 3.8899 | 2.6673  | -11.3299 H   | 1 UNL1 | 0.1390  |
| 21 H | 5.5378 | 2.0569  | -11.4363 H   | 1 UNL1 | 0.1412  |
| 22 H | 3.3740 | 2.1227  | -13.6103 H   | 1 UNL1 | 0.1327  |
| 23 H | 5.0157 | 2.7749  | -13.6674 H   | 1 UNL1 | 0.1320  |
| 24 H | 2.0887 | 0.4516  | -12.2133 H   | 1 UNL1 | 0.1672  |
| 25 H | 2.2863 | -0.7060 | -10.9012 H   | 1 UNL1 | 0.1639  |
| 26 H | 2.1016 | 1.0211  | -10.5386 H   | 1 UNL1 | 0.1552  |
| 27 H | 6.0272 | -0.2035 | -11.1581 H   | 1 UNL1 | 0.1438  |
| 28 H | 5.4650 | -2.4935 | -10.6332 H   | 1 UNL1 | 0.1259  |
| 29 H | 3.7273 | -2.2060 | -10.8014 H   | 1 UNL1 | 0.1363  |
| 30 H | 4.7604 | -3.4554 | -12.7882 H   | 1 UNL1 | 0.1405  |
| 31 H | 5.7923 | -2.0515 | -13.1230 H   | 1 UNL1 | 0.1459  |

|                   |        |         |              |        |         |
|-------------------|--------|---------|--------------|--------|---------|
| 32 H              | 1.6573 | -1.9599 | -14.1424 H   | 1 UNL1 | 0.1550  |
| 33 H              | 2.2569 | -3.2382 | -13.0385 H   | 1 UNL1 | 0.1566  |
| 34 H              | 4.7143 | 2.8015  | -16.0832 H   | 1 UNL1 | 0.1527  |
| 35 H              | 4.4843 | 1.6386  | -17.3904 H   | 1 UNL1 | 0.1540  |
| 36 H              | 3.3324 | 1.7082  | -16.0594 H   | 1 UNL1 | 0.1549  |
| 37 H              | 7.0919 | 1.8495  | -15.6192 H   | 1 UNL1 | 0.1565  |
| 38 H              | 7.3083 | 0.1103  | -15.4065 H   | 1 UNL1 | 0.1547  |
| 39 H              | 6.8568 | 0.7538  | -16.9861 H   | 1 UNL1 | 0.1570  |
| @<TRIPOS>BOND     |        |         |              |        |         |
| 1                 | 35     | 14      | 1            |        |         |
| 2                 | 39     | 15      | 1            |        |         |
| 3                 | 18     | 2       | 1            |        |         |
| 4                 | 14     | 34      | 1            |        |         |
| 5                 | 14     | 36      | 1            |        |         |
| 6                 | 14     | 1       | 1            |        |         |
| 7                 | 15     | 37      | 1            |        |         |
| 8                 | 15     | 1       | 1            |        |         |
| 9                 | 15     | 38      | 1            |        |         |
| 10                | 2      | 19      | 1            |        |         |
| 11                | 2      | 1       | 1            |        |         |
| 12                | 2      | 3       | 1            |        |         |
| 13                | 1      | 4       | 1            |        |         |
| 14                | 17     | 3       | 1            |        |         |
| 15                | 3      | 4       | 1            |        |         |
| 16                | 3      | 12      | 1            |        |         |
| 17                | 32     | 13      | 1            |        |         |
| 18                | 4      | 16      | 1            |        |         |
| 19                | 4      | 7       | 1            |        |         |
| 20                | 23     | 7       | 1            |        |         |
| 21                | 22     | 7       | 1            |        |         |
| 22                | 13     | 12      | 2            |        |         |
| 23                | 13     | 33      | 1            |        |         |
| 24                | 12     | 11      | 1            |        |         |
| 25                | 7      | 6       | 1            |        |         |
| 26                | 31     | 11      | 1            |        |         |
| 27                | 30     | 11      | 1            |        |         |
| 28                | 11     | 10      | 1            |        |         |
| 29                | 24     | 8       | 1            |        |         |
| 30                | 6      | 21      | 1            |        |         |
| 31                | 6      | 20      | 1            |        |         |
| 32                | 6      | 5       | 1            |        |         |
| 33                | 5      | 8       | 1            |        |         |
| 34                | 5      | 9       | 1            |        |         |
| 35                | 8      | 25      | 1            |        |         |
| 36                | 8      | 26      | 1            |        |         |
| 37                | 10     | 9       | 1            |        |         |
| 38                | 10     | 29      | 1            |        |         |
| 39                | 10     | 28      | 1            |        |         |
| 40                | 9      | 27      | 1            |        |         |
| Compound 31       |        |         |              |        |         |
| @<TRIPOS>MOLECULE |        |         |              |        |         |
| compuesto_31.out  |        |         |              |        |         |
| 39 41 0 0 0       |        |         |              |        |         |
| SMALL             |        |         |              |        |         |
| MULLIKEN_CHARGES  |        |         |              |        |         |
| @<TRIPOS>ATOM     |        |         |              |        |         |
| 1 C               | 5.4170 | -1.3561 | -15.8449 C.3 | 1 UNL1 | -0.2662 |
| 2 C               | 3.9966 | 1.9975  | -13.3650 C.3 | 1 UNL1 | -0.0355 |
| 3 C               | 2.5816 | -2.2878 | -13.9787 C.2 | 1 UNL1 | -0.4558 |
| 4 C               | 5.1569 | -2.1360 | -12.3390 C.3 | 1 UNL1 | -0.5048 |
| 5 C               | 6.5844 | 0.5591  | -12.6721 C.3 | 1 UNL1 | -0.5206 |
| 6 C               | 3.2555 | 3.1583  | -14.0410 C.3 | 1 UNL1 | -0.4997 |
| 7 H               | 5.4819 | -2.4558 | -15.8909 H   | 1 UNL1 | 0.1297  |
| 8 H               | 5.7161 | -0.9888 | -16.8418 H   | 1 UNL1 | 0.1282  |

|               |        |         |              |        |         |
|---------------|--------|---------|--------------|--------|---------|
| 9 H           | 3.2851 | -1.3142 | -16.3187 H   | 1 UNL1 | 0.1227  |
| 10 H          | 7.1243 | -0.1574 | -15.2225 H   | 1 UNL1 | 0.1313  |
| 11 H          | 6.9007 | -1.6310 | -14.2752 H   | 1 UNL1 | 0.1344  |
| 12 H          | 4.2404 | 1.0170  | -16.4963 H   | 1 UNL1 | 0.1275  |
| 13 H          | 2.8672 | 0.9522  | -15.3985 H   | 1 UNL1 | 0.1393  |
| 14 H          | 5.5689 | 1.8553  | -14.8476 H   | 1 UNL1 | 0.1189  |
| 15 H          | 4.3203 | 0.1647  | -11.1511 H   | 1 UNL1 | 0.1332  |
| 16 H          | 2.8947 | -0.7904 | -11.5584 H   | 1 UNL1 | 0.1347  |
| 17 H          | 2.1801 | 0.7961  | -13.2661 H   | 1 UNL1 | 0.1415  |
| 18 H          | 2.5250 | 1.6942  | -11.7862 H   | 1 UNL1 | 0.1246  |
| 19 H          | 4.7236 | 2.4323  | -12.6346 H   | 1 UNL1 | 0.1145  |
| 20 H          | 2.2857 | -2.6827 | -13.0217 H   | 1 UNL1 | 0.1560  |
| 21 H          | 1.9752 | -2.6599 | -14.7873 H   | 1 UNL1 | 0.1534  |
| 22 H          | 5.8623 | -1.8200 | -11.5654 H   | 1 UNL1 | 0.1501  |
| 23 H          | 4.4117 | -2.7853 | -11.8694 H   | 1 UNL1 | 0.1527  |
| 24 H          | 5.7074 | -2.7549 | -13.0582 H   | 1 UNL1 | 0.1567  |
| 25 H          | 7.1993 | -0.2413 | -12.2491 H   | 1 UNL1 | 0.1525  |
| 26 H          | 7.2636 | 1.2790  | -13.1395 H   | 1 UNL1 | 0.1506  |
| 27 H          | 2.4577 | 2.7984  | -14.7015 H   | 1 UNL1 | 0.1515  |
| 28 C          | 4.4977 | -0.9290 | -13.0331 C.3 | 1 UNL1 | 0.0984  |
| 29 C          | 6.3567 | -0.8006 | -14.7626 C.3 | 1 UNL1 | -0.3065 |
| 30 C          | 3.5934 | -1.4391 | -14.1584 C.2 | 1 UNL1 | 0.0855  |
| 31 C          | 3.9697 | -0.9214 | -15.5358 C.3 | 1 UNL1 | -0.0980 |
| 32 C          | 4.8113 | 1.1767  | -14.3948 C.3 | 1 UNL1 | -0.1272 |
| 33 C          | 3.9139 | 0.6174  | -15.5219 C.3 | 1 UNL1 | -0.2851 |
| 34 C          | 5.5742 | 0.0079  | -13.6892 C.3 | 1 UNL1 | 0.1305  |
| 35 C          | 3.0024 | 1.1088  | -12.5932 C.3 | 1 UNL1 | -0.2811 |
| 36 C          | 3.6697 | -0.1327 | -11.9947 C.3 | 1 UNL1 | -0.2916 |
| 37 H          | 6.0946 | 1.0699  | -11.8343 H   | 1 UNL1 | 0.1580  |
| 38 H          | 2.7916 | 3.8177  | -13.3019 H   | 1 UNL1 | 0.1470  |
| 39 H          | 3.9276 | 3.7699  | -14.6505 H   | 1 UNL1 | 0.1485  |
| @<TRIPOS>BOND |        |         |              |        |         |
| 1             | 8      | 1       | 1            |        |         |
| 2             | 12     | 33      | 1            |        |         |
| 3             | 9      | 31      | 1            |        |         |
| 4             | 7      | 1       | 1            |        |         |
| 5             | 1      | 31      | 1            |        |         |
| 6             | 1      | 29      | 1            |        |         |
| 7             | 31     | 33      | 1            |        |         |
| 8             | 31     | 30      | 1            |        |         |
| 9             | 33     | 13      | 1            |        |         |
| 10            | 33     | 32      | 1            |        |         |
| 11            | 10     | 29      | 1            |        |         |
| 12            | 14     | 32      | 1            |        |         |
| 13            | 21     | 3       | 1            |        |         |
| 14            | 29     | 11      | 1            |        |         |
| 15            | 29     | 34      | 1            |        |         |
| 16            | 27     | 6       | 1            |        |         |
| 17            | 39     | 6       | 1            |        |         |
| 18            | 32     | 34      | 1            |        |         |
| 19            | 32     | 2       | 1            |        |         |
| 20            | 30     | 3       | 2            |        |         |
| 21            | 30     | 28      | 1            |        |         |
| 22            | 6      | 2       | 1            |        |         |
| 23            | 6      | 38      | 1            |        |         |
| 24            | 3      | 20      | 1            |        |         |
| 25            | 34     | 28      | 1            |        |         |
| 26            | 34     | 5       | 1            |        |         |
| 27            | 2      | 19      | 1            |        |         |
| 28            | 2      | 35      | 1            |        |         |
| 29            | 17     | 35      | 1            |        |         |
| 30            | 26     | 5       | 1            |        |         |
| 31            | 24     | 4       | 1            |        |         |
| 32            | 28     | 4       | 1            |        |         |
| 33            | 28     | 36      | 1            |        |         |
| 34            | 5      | 25      | 1            |        |         |



```

35  5 37  1
36 35 36  1
37 35 18  1
38  4 23  1
39  4 22  1
40 36 16  1
41 36 15  1

```

## Compound 32

```

@<TRIPOS>MOLECULE
compuesto_32.out
39 40 0 0
SMALL
MULLIKEN_CHARGES

```

```

@<TRIPOS>ATOM
  1 H      4.5053  3.1892 -15.6032 H   1 UNL1  0.1566
  2 H      3.1962  2.6812 -14.4792 H   1 UNL1  0.1586
  3 H      6.4147  0.2791 -15.4278 H   1 UNL1  0.1638
  4 H      6.5905  2.0086 -15.7524 H   1 UNL1  0.1629
  5 H      7.1119  1.3496 -14.1958 H   1 UNL1  0.1640
  6 C      3.3163 -0.0245 -8.6058 C.3  1 UNL1 -0.2884
  7 C      3.8514 -1.2978 -9.2946 C.3  1 UNL1 -0.2693
  8 C      3.7570 -0.9710 -10.7724 C.2  1 UNL1 -0.0553
  9 C      3.8962 -2.0364 -11.8264 C.3  1 UNL1 -0.0226
 10 C      3.1164 -1.6625 -13.1071 C.3  1 UNL1 -0.2792
 11 C      3.8472 -0.6840 -14.0341 C.3  1 UNL1 -0.2705
 12 C      4.5333  0.5038 -13.3299 C.3  1 UNL1 -0.1024
 13 C      3.6494  1.1362 -12.2338 C.3  1 UNL1 -0.2763
 14 C      3.6300  0.3591 -10.9576 C.2  1 UNL1 -0.0533
 15 C      3.5337  1.1149 -9.6360 C.3  1 UNL1 -0.0364
 16 C      2.4217  2.1618 -9.5774 C.3  1 UNL1 -0.4877
 17 C      4.9675  1.5041 -14.3950 C.2  1 UNL1  0.1341
 18 C      3.4264 -3.4184 -11.3379 C.3  1 UNL1 -0.4914
 19 C      4.1889  2.4966 -14.8369 C.2  1 UNL1 -0.4557
 20 C      6.3341  1.2759 -14.9685 C.3  1 UNL1 -0.5134
 21 H      2.6111  1.2886 -12.5926 H   1 UNL1  0.1500
 22 H      4.0442  2.1541 -12.0201 H   1 UNL1  0.1448
 23 H      5.4578  0.1281 -12.8165 H   1 UNL1  0.1368
 24 H      3.1161 -0.3009 -14.7767 H   1 UNL1  0.1374
 25 H      4.6159 -1.2364 -14.6122 H   1 UNL1  0.1276
 26 H      2.1246 -1.2564 -12.8204 H   1 UNL1  0.1427
 27 H      2.9003 -2.5757 -13.6978 H   1 UNL1  0.1287
 28 H      4.9883 -2.1183 -12.0732 H   1 UNL1  0.1254
 29 H      3.2634 -2.1767 -8.9933 H   1 UNL1  0.1373
 30 H      4.9051 -1.5039 -9.0336 H   1 UNL1  0.1374
 31 H      3.7930  0.1764 -7.6375 H   1 UNL1  0.1290
 32 H      2.2330 -0.1503 -8.4161 H   1 UNL1  0.1384
 33 H      4.5177  1.6123 -9.4529 H   1 UNL1  0.1217
 34 H      2.3533  2.6000 -8.5708 H   1 UNL1  0.1484
 35 H      2.5969  2.9832 -10.2829 H   1 UNL1  0.1493
 36 H      1.4423  1.7262 -9.8202 H   1 UNL1  0.1550
 37 H      3.5311 -4.1759 -12.1240 H   1 UNL1  0.1472
 38 H      4.0198 -3.7684 -10.4842 H   1 UNL1  0.1491
 39 H      2.3670 -3.3650 -11.0405 H   1 UNL1  0.1556

```

```

@<TRIPOS>BOND
  1  4 20  1
  2  1 19  1
  3  3 20  1
  4 20 17  1
  5 20  5  1
  6 19  2  1
  7 19 17  2
  8 24 11  1
  9 25 11  1
 10 17 12  1

```

11 11 12 1  
 12 11 10 1  
 13 27 10 1  
 14 12 23 1  
 15 12 13 1  
 16 10 26 1  
 17 10 9 1  
 18 21 13 1  
 19 13 22 1  
 20 13 14 1  
 21 37 18 1  
 22 28 9 1  
 23 9 18 1  
 24 9 8 1  
 25 18 39 1  
 26 18 38 1  
 27 14 8 2  
 28 14 15 1  
 29 8 7 1  
 30 35 16 1  
 31 36 16 1  
 32 15 16 1  
 33 15 33 1  
 34 15 6 1  
 35 16 34 1  
 36 7 30 1  
 37 7 29 1  
 38 7 6 1  
 39 6 32 1  
 40 6 31 1

### Compound 33

@<TRIPOS>MOLECULE

compuesto\_33.out

39 39 0 0

SMALL

MULLIKEN\_CHARGES

@<TRIPOS>ATOM

|      |        |         |              |        |         |
|------|--------|---------|--------------|--------|---------|
| 1 C  | 2.8893 | 1.5406  | -13.0696 C.3 | 1 UNL1 | -0.3143 |
| 2 C  | 3.1264 | 0.7519  | -11.7333 C.3 | 1 UNL1 | 0.2366  |
| 3 C  | 4.2607 | -0.2245 | -11.9679 C.2 | 1 UNL1 | -0.2052 |
| 4 C  | 4.1961 | -1.5585 | -11.9550 C.2 | 1 UNL1 | -0.1420 |
| 5 C  | 4.6240 | 1.4241  | -14.8915 C.2 | 1 UNL1 | 0.0820  |
| 6 C  | 5.2612 | 0.7959  | -16.1114 C.3 | 1 UNL1 | -0.2960 |
| 7 C  | 5.3110 | 2.6751  | -14.4265 C.3 | 1 UNL1 | -0.5001 |
| 8 H  | 6.2639 | 1.2403  | -16.2787 H   | 1 UNL1 | 0.1401  |
| 9 H  | 4.6637 | 1.0761  | -17.0043 H   | 1 UNL1 | 0.1408  |
| 10 H | 6.1922 | -1.0582 | -16.7858 H   | 1 UNL1 | 0.1309  |
| 11 H | 4.4713 | -1.2059 | -16.4285 H   | 1 UNL1 | 0.1330  |
| 12 H | 3.3282 | -2.1148 | -11.6167 H   | 1 UNL1 | 0.1369  |
| 13 H | 6.4830 | -0.6020 | -14.1662 H   | 1 UNL1 | 0.1507  |
| 14 H | 3.0700 | 0.0035  | -14.6179 H   | 1 UNL1 | 0.1526  |
| 15 H | 5.1826 | 0.2789  | -12.2787 H   | 1 UNL1 | 0.1530  |
| 16 H | 1.8022 | 1.6320  | -13.2579 H   | 1 UNL1 | 0.1422  |
| 17 H | 3.2462 | 2.5859  | -12.9390 H   | 1 UNL1 | 0.1399  |
| 18 H | 6.2958 | -2.0653 | -12.2205 H   | 1 UNL1 | 0.1495  |
| 19 H | 5.2163 | -3.4554 | -12.2551 H   | 1 UNL1 | 0.1430  |
| 20 H | 4.2372 | -3.1653 | -15.7967 H   | 1 UNL1 | 0.1569  |
| 21 H | 4.2671 | -4.1796 | -14.3515 H   | 1 UNL1 | 0.1567  |
| 22 H | 3.1185 | -2.8378 | -14.4618 H   | 1 UNL1 | 0.1646  |
| 23 H | 3.4602 | 2.7808  | -10.9296 H   | 1 UNL1 | 0.1509  |
| 24 H | 2.8936 | 1.6306  | -9.7262 H    | 1 UNL1 | 0.1561  |
| 25 H | 4.5607 | 1.5751  | -10.2751 H   | 1 UNL1 | 0.1571  |
| 26 H | 1.4964 | -0.6603 | -12.1144 H   | 1 UNL1 | 0.1565  |
| 27 H | 1.9339 | -0.5183 | -10.4057 H   | 1 UNL1 | 0.1546  |

|                   |        |         |              |        |         |
|-------------------|--------|---------|--------------|--------|---------|
| 28 H              | 1.0061 | 0.7648  | -11.1908 H   | 1 UNL1 | 0.1514  |
| 29 H              | 4.8062 | 3.1242  | -13.5569 H   | 1 UNL1 | 0.1606  |
| 30 H              | 6.3441 | 2.4655  | -14.1207 H   | 1 UNL1 | 0.1594  |
| 31 H              | 5.3408 | 3.4356  | -15.2153 H   | 1 UNL1 | 0.1560  |
| 32 C              | 1.8179 | 0.0443  | -11.3381 C.3 | 1 UNL1 | -0.5257 |
| 33 C              | 3.5311 | 1.7368  | -10.6097 C.3 | 1 UNL1 | -0.5304 |
| 34 C              | 4.1464 | -3.1484 | -14.7029 C.3 | 1 UNL1 | -0.4926 |
| 35 C              | 5.2956 | -2.3971 | -12.5608 C.3 | 1 UNL1 | -0.3088 |
| 36 C              | 5.1333 | -2.2279 | -14.0590 C.2 | 1 UNL1 | 0.0931  |
| 37 C              | 3.5377 | 0.9277  | -14.2785 C.2 | 1 UNL1 | -0.2199 |
| 38 C              | 5.7470 | -1.2144 | -14.6887 C.2 | 1 UNL1 | -0.2425 |
| 39 C              | 5.4107 | -0.7384 | -16.0674 C.3 | 1 UNL1 | -0.2276 |
| @<TRIPOS>BOND     |        |         |              |        |         |
| 1                 | 9      | 6       | 1            |        |         |
| 2                 | 10     | 39      | 1            |        |         |
| 3                 | 11     | 39      | 1            |        |         |
| 4                 | 8      | 6       | 1            |        |         |
| 5                 | 6      | 39      | 1            |        |         |
| 6                 | 6      | 5       | 1            |        |         |
| 7                 | 39     | 38      | 1            |        |         |
| 8                 | 20     | 34      | 1            |        |         |
| 9                 | 31     | 7       | 1            |        |         |
| 10                | 5      | 7       | 1            |        |         |
| 11                | 5      | 37      | 2            |        |         |
| 12                | 34     | 22      | 1            |        |         |
| 13                | 34     | 21      | 1            |        |         |
| 14                | 34     | 36      | 1            |        |         |
| 15                | 38     | 13      | 1            |        |         |
| 16                | 38     | 36      | 2            |        |         |
| 17                | 14     | 37      | 1            |        |         |
| 18                | 7      | 30      | 1            |        |         |
| 19                | 7      | 29      | 1            |        |         |
| 20                | 37     | 1       | 1            |        |         |
| 21                | 36     | 35      | 1            |        |         |
| 22                | 16     | 1       | 1            |        |         |
| 23                | 1      | 17      | 1            |        |         |
| 24                | 1      | 2       | 1            |        |         |
| 25                | 35     | 19      | 1            |        |         |
| 26                | 35     | 18      | 1            |        |         |
| 27                | 35     | 4       | 1            |        |         |
| 28                | 15     | 3       | 1            |        |         |
| 29                | 26     | 32      | 1            |        |         |
| 30                | 3      | 4       | 2            |        |         |
| 31                | 3      | 2       | 1            |        |         |
| 32                | 4      | 12      | 1            |        |         |
| 33                | 2      | 32      | 1            |        |         |
| 34                | 2      | 33      | 1            |        |         |
| 35                | 32     | 28      | 1            |        |         |
| 36                | 32     | 27      | 1            |        |         |
| 37                | 23     | 33      | 1            |        |         |
| 38                | 33     | 25      | 1            |        |         |
| 39                | 33     | 24      | 1            |        |         |
| Compound 34       |        |         |              |        |         |
| @<TRIPOS>MOLECULE |        |         |              |        |         |
| compuesto_34.out  |        |         |              |        |         |
| 39 41 0 0 0       |        |         |              |        |         |
| SMALL             |        |         |              |        |         |
| MULLIKEN_CHARGES  |        |         |              |        |         |
| @<TRIPOS>ATOM     |        |         |              |        |         |
| 1 H               | 1.9233 | -2.2260 | -12.0313 H   | 1 UNL1 | 0.1558  |
| 2 C               | 4.0344 | -0.4267 | -14.1411 C.3 | 1 UNL1 | -0.2043 |
| 3 H               | 3.1581 | 3.9770  | -14.6372 H   | 1 UNL1 | 0.1555  |
| 4 H               | 3.6786 | 3.2482  | -16.1939 H   | 1 UNL1 | 0.1588  |
| 5 H               | 4.9602 | -2.6956 | -15.3506 H   | 1 UNL1 | 0.1580  |

|               |        |         |              |        |         |
|---------------|--------|---------|--------------|--------|---------|
| 6 H           | 6.4203 | -2.7001 | -14.3610 H   | 1 UNL1 | 0.1490  |
| 7 H           | 6.5418 | -2.9461 | -16.1181 H   | 1 UNL1 | 0.1456  |
| 8 H           | 7.2679 | -0.6557 | -15.4567 H   | 1 UNL1 | 0.1106  |
| 9 H           | 4.8311 | -1.0066 | -17.2592 H   | 1 UNL1 | 0.1355  |
| 10 H          | 6.4409 | -0.3652 | -17.6428 H   | 1 UNL1 | 0.1276  |
| 11 H          | 5.5388 | 1.8069  | -17.2930 H   | 1 UNL1 | 0.1263  |
| 12 H          | 4.0155 | 1.0744  | -16.7516 H   | 1 UNL1 | 0.1388  |
| 13 H          | 5.6951 | 2.8253  | -12.6654 H   | 1 UNL1 | 0.1413  |
| 14 H          | 4.0006 | 3.3478  | -12.5897 H   | 1 UNL1 | 0.1430  |
| 15 H          | 5.1906 | 0.7454  | -11.7908 H   | 1 UNL1 | 0.1305  |
| 16 H          | 3.7215 | 1.5263  | -11.2257 H   | 1 UNL1 | 0.1275  |
| 17 H          | 2.3755 | 0.6561  | -13.0719 H   | 1 UNL1 | 0.1493  |
| 18 H          | 3.4240 | -0.5787 | -15.0405 H   | 1 UNL1 | 0.1535  |
| 19 H          | 6.0746 | -0.0053 | -13.5353 H   | 1 UNL1 | 0.1203  |
| 20 H          | 6.4952 | 1.7958  | -15.0934 H   | 1 UNL1 | 0.1312  |
| 21 C          | 4.6691 | -1.8371 | -11.9858 C.3 | 1 UNL1 | -0.4809 |
| 22 C          | 2.3836 | -2.0822 | -13.0162 C.3 | 1 UNL1 | -0.4941 |
| 23 C          | 3.6351 | -1.2240 | -12.8988 C.3 | 1 UNL1 | 0.1130  |
| 24 C          | 3.7710 | 3.2373  | -15.1237 C.2 | 1 UNL1 | -0.4683 |
| 25 C          | 6.0116 | -2.3916 | -15.3312 C.3 | 1 UNL1 | -0.4874 |
| 26 C          | 6.1737 | -0.8908 | -15.5286 C.3 | 1 UNL1 | -0.0449 |
| 27 C          | 5.6439 | -0.3610 | -16.8820 C.3 | 1 UNL1 | -0.2899 |
| 28 C          | 5.1125 | 1.0622  | -16.6042 C.3 | 1 UNL1 | -0.2617 |
| 29 C          | 5.4650 | -0.0226 | -14.4598 C.3 | 1 UNL1 | -0.0753 |
| 30 C          | 5.4534 | 1.3867  | -15.1257 C.3 | 1 UNL1 | -0.1366 |
| 31 C          | 4.5636 | 2.4052  | -14.4440 C.2 | 1 UNL1 | 0.1394  |
| 32 C          | 4.6494 | 2.5150  | -12.9372 C.3 | 1 UNL1 | -0.3104 |
| 33 C          | 4.2612 | 1.2474  | -12.1512 C.3 | 1 UNL1 | -0.2236 |
| 34 C          | 3.3996 | 0.2895  | -12.9479 C.3 | 1 UNL1 | -0.2055 |
| 35 H          | 1.6179 | -1.6303 | -13.6739 H   | 1 UNL1 | 0.1544  |
| 36 H          | 2.6249 | -3.0669 | -13.4383 H   | 1 UNL1 | 0.1542  |
| 37 H          | 4.8802 | -2.8847 | -12.2940 H   | 1 UNL1 | 0.1562  |
| 38 H          | 5.6281 | -1.2999 | -11.9886 H   | 1 UNL1 | 0.1536  |
| 39 H          | 4.2979 | -1.8597 | -10.9521 H   | 1 UNL1 | 0.1538  |
| @<TRIPOS>BOND |        |         |              |        |         |
| 1             | 10     | 27      | 1            |        |         |
| 2             | 11     | 28      | 1            |        |         |
| 3             | 9      | 27      | 1            |        |         |
| 4             | 27     | 28      | 1            |        |         |
| 5             | 27     | 26      | 1            |        |         |
| 6             | 12     | 28      | 1            |        |         |
| 7             | 28     | 30      | 1            |        |         |
| 8             | 4      | 24      | 1            |        |         |
| 9             | 7      | 25      | 1            |        |         |
| 10            | 26     | 8       | 1            |        |         |
| 11            | 26     | 25      | 1            |        |         |
| 12            | 26     | 29      | 1            |        |         |
| 13            | 5      | 25      | 1            |        |         |
| 14            | 25     | 6       | 1            |        |         |
| 15            | 30     | 20      | 1            |        |         |
| 16            | 30     | 29      | 1            |        |         |
| 17            | 30     | 31      | 1            |        |         |
| 18            | 24     | 3       | 1            |        |         |
| 19            | 24     | 31      | 2            |        |         |
| 20            | 18     | 2       | 1            |        |         |
| 21            | 29     | 2       | 1            |        |         |
| 22            | 29     | 19      | 1            |        |         |
| 23            | 31     | 32      | 1            |        |         |
| 24            | 2      | 34      | 1            |        |         |
| 25            | 2      | 23      | 1            |        |         |
| 26            | 35     | 22      | 1            |        |         |
| 27            | 36     | 22      | 1            |        |         |
| 28            | 17     | 34      | 1            |        |         |
| 29            | 22     | 23      | 1            |        |         |
| 30            | 22     | 1       | 1            |        |         |
| 31            | 34     | 23      | 1            |        |         |

32 34 33 1  
 33 32 13 1  
 34 32 14 1  
 35 32 33 1  
 36 23 21 1  
 37 37 21 1  
 38 33 15 1  
 39 33 16 1  
 40 38 21 1  
 41 21 39 1

## Compound 35

@<TRIPOS>MOLECULE

compuesto\_35.out

39 41 0 0 0

SMALL

MULLIKEN\_CHARGES

@<TRIPOS>ATOM

|      |        |         |              |        |         |
|------|--------|---------|--------------|--------|---------|
| 1 H  | 6.1934 | -1.9008 | -15.8739 H   | 1 UNL1 | 0.1516  |
| 2 H  | 4.9196 | -2.1422 | -17.0704 H   | 1 UNL1 | 0.1479  |
| 3 C  | 3.6139 | -2.1325 | -14.5769 C.3 | 1 UNL1 | -0.2829 |
| 4 H  | 5.9799 | -0.4658 | -14.0849 H   | 1 UNL1 | 0.1310  |
| 5 C  | 5.3312 | -1.4229 | -16.3567 C.3 | 1 UNL1 | -0.4972 |
| 6 H  | 4.3023 | -2.9906 | -14.4955 H   | 1 UNL1 | 0.1321  |
| 7 H  | 2.7180 | -2.4904 | -15.1194 H   | 1 UNL1 | 0.1265  |
| 8 H  | 2.1717 | -1.3479 | -13.1210 H   | 1 UNL1 | 0.1370  |
| 9 H  | 3.4045 | -2.3775 | -12.4120 H   | 1 UNL1 | 0.1335  |
| 10 H | 3.4908 | -0.3853 | -15.8725 H   | 1 UNL1 | 0.1168  |
| 11 H | 6.6120 | 0.7340  | -10.7675 H   | 1 UNL1 | 0.1389  |
| 12 H | 5.2874 | 2.7978  | -11.3414 H   | 1 UNL1 | 0.1331  |
| 13 H | 6.4616 | 2.4324  | -12.6115 H   | 1 UNL1 | 0.1356  |
| 14 H | 3.9904 | 3.0341  | -13.3408 H   | 1 UNL1 | 0.1176  |
| 15 H | 4.3620 | 1.7153  | -15.3744 H   | 1 UNL1 | 0.1322  |
| 16 H | 6.0021 | 1.7545  | -14.7078 H   | 1 UNL1 | 0.1324  |
| 17 H | 5.8074 | -2.4348 | -11.8941 H   | 1 UNL1 | 0.1637  |
| 18 H | 6.1869 | -1.6234 | -10.3674 H   | 1 UNL1 | 0.1550  |
| 19 H | 4.5307 | -2.1343 | -10.6964 H   | 1 UNL1 | 0.1601  |
| 20 H | 2.4083 | 0.9819  | -14.7866 H   | 1 UNL1 | 0.1576  |
| 21 H | 1.3305 | 0.3523  | -13.5182 H   | 1 UNL1 | 0.1514  |
| 22 H | 1.6188 | 2.1082  | -13.6648 H   | 1 UNL1 | 0.1482  |
| 23 H | 2.0592 | 0.3674  | -11.0640 H   | 1 UNL1 | 0.1513  |
| 24 H | 3.5413 | 1.2131  | -10.5790 H   | 1 UNL1 | 0.1656  |
| 25 H | 2.1829 | 2.1438  | -11.2563 H   | 1 UNL1 | 0.1486  |
| 26 H | 5.7081 | -0.5523 | -16.9105 H   | 1 UNL1 | 0.1503  |
| 27 C | 3.2837 | 1.0056  | -12.7646 C.3 | 1 UNL1 | 0.1698  |
| 28 C | 2.7404 | 1.1985  | -11.3436 C.3 | 1 UNL1 | -0.5178 |
| 29 C | 2.0938 | 1.1161  | -13.7379 C.3 | 1 UNL1 | -0.5160 |
| 30 C | 5.4316 | -1.7074 | -11.1591 C.3 | 1 UNL1 | -0.4905 |
| 31 C | 4.9688 | 1.4163  | -14.4985 C.3 | 1 UNL1 | -0.3054 |
| 32 C | 4.4015 | 2.0219  | -13.1848 C.3 | 1 UNL1 | -0.1065 |
| 33 C | 5.5316 | 2.0600  | -12.1304 C.3 | 1 UNL1 | -0.2618 |
| 34 C | 5.8100 | 0.7232  | -11.4984 C.2 | 1 UNL1 | -0.2451 |
| 35 C | 5.1308 | -0.3967 | -11.8112 C.2 | 1 UNL1 | 0.0529  |
| 36 C | 4.2830 | -0.9691 | -15.3415 C.3 | 1 UNL1 | -0.0433 |
| 37 C | 4.9398 | -0.1039 | -14.2484 C.3 | 1 UNL1 | -0.1130 |
| 38 C | 4.1006 | -0.3331 | -12.9310 C.3 | 1 UNL1 | 0.0278  |
| 39 C | 3.2511 | -1.5943 | -13.1736 C.3 | 1 UNL1 | -0.2890 |

@<TRIPOS>BOND

1 2 5 1  
 2 26 5 1  
 3 5 1 1  
 4 5 36 1  
 5 10 36 1  
 6 15 31 1  
 7 36 3 1

8 36 37 1  
 9 7 3 1  
 10 20 29 1  
 11 16 31 1  
 12 3 6 1  
 13 3 39 1  
 14 31 37 1  
 15 31 32 1  
 16 37 4 1  
 17 37 38 1  
 18 29 22 1  
 19 29 21 1  
 20 29 27 1  
 21 14 32 1  
 22 32 27 1  
 23 32 33 1  
 24 39 8 1  
 25 39 38 1  
 26 39 9 1  
 27 38 27 1  
 28 38 35 1  
 29 27 28 1  
 30 13 33 1  
 31 33 34 1  
 32 33 12 1  
 33 17 30 1  
 34 35 34 2  
 35 35 30 1  
 36 34 11 1  
 37 28 25 1  
 38 28 23 1  
 39 28 24 1  
 40 30 19 1  
 41 30 18 1

### Compound 36

@<TRIPOS>MOLECULE  
 compuesto\_36.out  
 39 40 0 0 0  
 SMALL  
 MULLIKEN\_CHARGES

@<TRIPOS>ATOM  
 1 C 4.8247 1.1208 -13.3629 C.3 1 UNL1 -0.3029  
 2 H 5.5614 1.6549 -13.9967 H 1 UNL1 0.1409  
 3 H 4.2275 0.4632 -14.0446 H 1 UNL1 0.1543  
 4 H 6.1054 0.9607 -11.6422 H 1 UNL1 0.1315  
 5 H 6.3321 -0.3453 -12.7975 H 1 UNL1 0.1299  
 6 H 4.9774 -0.5903 -10.4290 H 1 UNL1 0.1269  
 7 H 1.9627 -1.4068 -10.1791 H 1 UNL1 0.1474  
 8 H 1.8743 2.4584 -8.9839 H 1 UNL1 0.1446  
 9 H 3.2875 1.9366 -8.0354 H 1 UNL1 0.1423  
 10 H 3.7710 3.2553 -10.2289 H 1 UNL1 0.1316  
 11 H 4.7034 1.7676 -9.9660 H 1 UNL1 0.1383  
 12 H 4.2558 3.7350 -13.9610 H 1 UNL1 0.1573  
 13 H 3.0718 4.0438 -12.6058 H 1 UNL1 0.1595  
 14 H 5.7531 -2.3632 -11.8572 H 1 UNL1 0.1056  
 15 H 1.0967 -1.1383 -7.9842 H 1 UNL1 0.1597  
 16 H 2.0938 -0.0820 -6.9707 H 1 UNL1 0.1615  
 17 H 0.5863 0.5382 -7.7014 H 1 UNL1 0.1615  
 18 H 4.3688 -3.4130 -13.6544 H 1 UNL1 0.1456  
 19 H 3.1870 -2.0903 -13.5640 H 1 UNL1 0.1505  
 20 H 4.8575 -1.7720 -14.1044 H 1 UNL1 0.1477  
 21 H 4.2708 -4.1214 -11.1966 H 1 UNL1 0.1445  
 22 H 4.1231 -2.8723 -9.9418 H 1 UNL1 0.1519  
 23 H 2.8458 -3.0726 -11.1765 H 1 UNL1 0.1521

|               |        |         |              |        |         |
|---------------|--------|---------|--------------|--------|---------|
| 24 C          | 3.9352 | -3.0847 | -11.0091 C.3 | 1 UNL1 | -0.4958 |
| 25 C          | 4.2461 | -2.3452 | -13.3915 C.3 | 1 UNL1 | -0.4912 |
| 26 C          | 1.4621 | -0.1084 | -7.8747 C.3  | 1 UNL1 | -0.5055 |
| 27 H          | 2.5675 | -0.3532 | -12.2902 H   | 1 UNL1 | 0.1255  |
| 28 H          | 2.0810 | 1.8778  | -11.5904 H   | 1 UNL1 | 0.1396  |
| 29 C          | 4.6660 | -2.0991 | -11.9332 C.3 | 1 UNL1 | -0.0016 |
| 30 C          | 3.7439 | 3.3480  | -13.1039 C.2 | 1 UNL1 | -0.4695 |
| 31 C          | 3.6811 | 2.1508  | -10.1614 C.3 | 1 UNL1 | -0.2470 |
| 32 C          | 2.7541 | 1.7790  | -8.9955 C.3  | 1 UNL1 | -0.3012 |
| 33 C          | 2.2383 | 0.3649  | -9.0750 C.2  | 1 UNL1 | 0.1010  |
| 34 C          | 2.4072 | -0.4143 | -10.1596 C.2 | 1 UNL1 | -0.2846 |
| 35 C          | 3.8988 | 2.0882  | -12.6779 C.2 | 1 UNL1 | 0.1168  |
| 36 C          | 3.1463 | 1.5600  | -11.4790 C.3 | 1 UNL1 | -0.1362 |
| 37 C          | 3.1516 | 0.0093  | -11.4077 C.3 | 1 UNL1 | -0.0544 |
| 38 C          | 4.5781 | -0.6053 | -11.4755 C.3 | 1 UNL1 | -0.1128 |
| 39 C          | 5.5476 | 0.2715  | -12.3123 C.3 | 1 UNL1 | -0.2653 |
| @<TRIPOS>BOND |        |         |              |        |         |
| 1             | 20     | 25      | 1            |        |         |
| 2             | 3      | 1       | 1            |        |         |
| 3             | 2      | 1       | 1            |        |         |
| 4             | 12     | 30      | 1            |        |         |
| 5             | 18     | 25      | 1            |        |         |
| 6             | 19     | 25      | 1            |        |         |
| 7             | 25     | 29      | 1            |        |         |
| 8             | 1      | 35      | 1            |        |         |
| 9             | 1      | 39      | 1            |        |         |
| 10            | 30     | 35      | 2            |        |         |
| 11            | 30     | 13      | 1            |        |         |
| 12            | 5      | 39      | 1            |        |         |
| 13            | 35     | 36      | 1            |        |         |
| 14            | 39     | 4       | 1            |        |         |
| 15            | 39     | 38      | 1            |        |         |
| 16            | 27     | 37      | 1            |        |         |
| 17            | 29     | 14      | 1            |        |         |
| 18            | 29     | 38      | 1            |        |         |
| 19            | 29     | 24      | 1            |        |         |
| 20            | 28     | 36      | 1            |        |         |
| 21            | 36     | 37      | 1            |        |         |
| 22            | 36     | 31      | 1            |        |         |
| 23            | 38     | 37      | 1            |        |         |
| 24            | 38     | 6       | 1            |        |         |
| 25            | 37     | 34      | 1            |        |         |
| 26            | 21     | 24      | 1            |        |         |
| 27            | 23     | 24      | 1            |        |         |
| 28            | 24     | 22      | 1            |        |         |
| 29            | 10     | 31      | 1            |        |         |
| 30            | 7      | 34      | 1            |        |         |
| 31            | 31     | 11      | 1            |        |         |
| 32            | 31     | 32      | 1            |        |         |
| 33            | 34     | 33      | 2            |        |         |
| 34            | 33     | 32      | 1            |        |         |
| 35            | 33     | 26      | 1            |        |         |
| 36            | 32     | 8       | 1            |        |         |
| 37            | 32     | 9       | 1            |        |         |
| 38            | 15     | 26      | 1            |        |         |
| 39            | 26     | 17      | 1            |        |         |
| 40            | 26     | 16      | 1            |        |         |

Compound 37

@<TRIPOS>MOLECULE  
compuesto\_37.out  
39 39 0 0 0  
SMALL  
MULLIKEN\_CHARGES  
  
@<TRIPOS>ATOM

|               |    |        |         |          |     |   |      |         |
|---------------|----|--------|---------|----------|-----|---|------|---------|
| 1             | C  | 4.5953 | 1.1146  | -14.2334 | C.2 | 1 | UNL1 | -0.2397 |
| 2             | H  | 3.7632 | -3.6251 | -12.8606 | H   | 1 | UNL1 | 0.1505  |
| 3             | H  | 5.4458 | -3.9741 | -13.2329 | H   | 1 | UNL1 | 0.1490  |
| 4             | H  | 2.3682 | 0.4188  | -8.3135  | H   | 1 | UNL1 | 0.1578  |
| 5             | H  | 2.5448 | -1.0771 | -9.2360  | H   | 1 | UNL1 | 0.1633  |
| 6             | H  | 0.9668 | -0.2863 | -9.1259  | H   | 1 | UNL1 | 0.1604  |
| 7             | H  | 6.1081 | -1.6088 | -12.8720 | H   | 1 | UNL1 | 0.1170  |
| 8             | H  | 5.5547 | 4.3862  | -13.7986 | H   | 1 | UNL1 | 0.1573  |
| 9             | H  | 5.3531 | 3.4409  | -15.3102 | H   | 1 | UNL1 | 0.1556  |
| 10            | H  | 3.2969 | 3.7582  | -11.2808 | H   | 1 | UNL1 | 0.1308  |
| 11            | H  | 2.7330 | 2.5176  | -12.4085 | H   | 1 | UNL1 | 0.1427  |
| 12            | H  | 3.3919 | 2.2013  | -9.4362  | H   | 1 | UNL1 | 0.1461  |
| 13            | H  | 1.8361 | 0.8250  | -12.5626 | H   | 1 | UNL1 | 0.1536  |
| 14            | H  | 0.7936 | -0.2545 | -11.6205 | H   | 1 | UNL1 | 0.1392  |
| 15            | H  | 5.2834 | 1.5308  | -11.5411 | H   | 1 | UNL1 | 0.1556  |
| 16            | H  | 5.5175 | 3.3007  | -11.6580 | H   | 1 | UNL1 | 0.1434  |
| 17            | H  | 2.6767 | -1.9184 | -11.4036 | H   | 1 | UNL1 | 0.1346  |
| 18            | H  | 2.2310 | -1.6046 | -13.0813 | H   | 1 | UNL1 | 0.1296  |
| 19            | H  | 4.4985 | -0.0310 | -11.6921 | H   | 1 | UNL1 | 0.1545  |
| 20            | H  | 3.9948 | -0.8394 | -14.6374 | H   | 1 | UNL1 | 0.1322  |
| 21            | H  | 4.5956 | 1.2872  | -15.3241 | H   | 1 | UNL1 | 0.1481  |
| 22            | H  | 4.5099 | -2.9207 | -14.2972 | H   | 1 | UNL1 | 0.1477  |
| 23            | H  | 4.5262 | -2.7771 | -10.4855 | H   | 1 | UNL1 | 0.1500  |
| 24            | H  | 6.1808 | -3.1651 | -10.9378 | H   | 1 | UNL1 | 0.1493  |
| 25            | H  | 5.7736 | -1.5379 | -10.3856 | H   | 1 | UNL1 | 0.1500  |
| 26            | C  | 5.4162 | -2.3824 | -10.9838 | C.3 | 1 | UNL1 | -0.4976 |
| 27            | C  | 4.6852 | -3.1842 | -13.2500 | C.3 | 1 | UNL1 | -0.4936 |
| 28            | C  | 2.0440 | -0.1007 | -9.2229  | C.3 | 1 | UNL1 | -0.5043 |
| 29            | C  | 5.1402 | -1.9679 | -12.4334 | C.3 | 1 | UNL1 | -0.0014 |
| 30            | C  | 5.2982 | 3.4308  | -14.2310 | C.2 | 1 | UNL1 | -0.4449 |
| 31            | C  | 3.4261 | 2.6911  | -11.5554 | C.3 | 1 | UNL1 | -0.2221 |
| 32            | C  | 3.0484 | 1.8209  | -10.3976 | C.2 | 1 | UNL1 | -0.2743 |
| 33            | C  | 2.3533 | 0.6743  | -10.4684 | C.2 | 1 | UNL1 | 0.1109  |
| 34            | C  | 1.8481 | 0.0629  | -11.7476 | C.3 | 1 | UNL1 | -0.3064 |
| 35            | C  | 4.9498 | 2.3520  | -13.5109 | C.2 | 1 | UNL1 | 0.1399  |
| 36            | C  | 4.8832 | 2.4564  | -12.0095 | C.3 | 1 | UNL1 | -0.3015 |
| 37            | C  | 2.6965 | -1.1411 | -12.1914 | C.3 | 1 | UNL1 | -0.2432 |
| 38            | C  | 4.1627 | -0.7527 | -12.4863 | C.3 | 1 | UNL1 | -0.1242 |
| 39            | C  | 4.2577 | -0.1235 | -13.8494 | C.2 | 1 | UNL1 | -0.1159 |
| @<TRIPOS>BOND |    |        |         |          |     |   |      |         |
| 1             | 21 | 1      | 1       |          |     |   |      |         |
| 2             | 9  | 30     | 1       |          |     |   |      |         |
| 3             | 20 | 39     | 1       |          |     |   |      |         |
| 4             | 22 | 27     | 1       |          |     |   |      |         |
| 5             | 1  | 39     | 2       |          |     |   |      |         |
| 6             | 1  | 35     | 1       |          |     |   |      |         |
| 7             | 30 | 8      | 1       |          |     |   |      |         |
| 8             | 30 | 35     | 2       |          |     |   |      |         |
| 9             | 39 | 38     | 1       |          |     |   |      |         |
| 10            | 35 | 36     | 1       |          |     |   |      |         |
| 11            | 27 | 3      | 1       |          |     |   |      |         |
| 12            | 27 | 2      | 1       |          |     |   |      |         |
| 13            | 27 | 29     | 1       |          |     |   |      |         |
| 14            | 18 | 37     | 1       |          |     |   |      |         |
| 15            | 7  | 29     | 1       |          |     |   |      |         |
| 16            | 13 | 34     | 1       |          |     |   |      |         |
| 17            | 38 | 29     | 1       |          |     |   |      |         |
| 18            | 38 | 37     | 1       |          |     |   |      |         |
| 19            | 38 | 19     | 1       |          |     |   |      |         |
| 20            | 29 | 26     | 1       |          |     |   |      |         |
| 21            | 11 | 31     | 1       |          |     |   |      |         |
| 22            | 37 | 34     | 1       |          |     |   |      |         |
| 23            | 37 | 17     | 1       |          |     |   |      |         |
| 24            | 36 | 16     | 1       |          |     |   |      |         |
| 25            | 36 | 31     | 1       |          |     |   |      |         |
| 26            | 36 | 15     | 1       |          |     |   |      |         |



27 34 14 1  
 28 34 33 1  
 29 31 10 1  
 30 31 32 1  
 31 26 24 1  
 32 26 23 1  
 33 26 25 1  
 34 33 32 2  
 35 33 28 1  
 36 32 12 1  
 37 5 28 1  
 38 28 6 1  
 39 28 4 1

## Compound 38

@<TRIPOS>MOLECULE

compuesto\_38.out

39 40 0 0 0

SMALL

MULLIKEN\_CHARGES

@<TRIPOS>ATOM

|      |        |         |              |        |         |
|------|--------|---------|--------------|--------|---------|
| 1 C  | 6.0731 | 0.9337  | -14.4273 C.3 | 1 UNL1 | -0.2571 |
| 2 H  | 6.6441 | -0.7316 | -16.4711 H   | 1 UNL1 | 0.1586  |
| 3 H  | 5.5319 | -1.1660 | -17.8354 H   | 1 UNL1 | 0.1558  |
| 4 H  | 2.5413 | -0.9626 | -16.1132 H   | 1 UNL1 | 0.1634  |
| 5 H  | 3.1736 | -0.7616 | -17.7583 H   | 1 UNL1 | 0.1632  |
| 6 H  | 2.7441 | 0.6749  | -16.7816 H   | 1 UNL1 | 0.1632  |
| 7 H  | 2.3462 | -2.2410 | -12.3431 H   | 1 UNL1 | 0.1488  |
| 8 H  | 2.2354 | -2.3711 | -10.5802 H   | 1 UNL1 | 0.1462  |
| 9 H  | 3.7159 | -2.8802 | -11.4036 H   | 1 UNL1 | 0.1494  |
| 10 H | 5.7594 | -2.1025 | -11.7054 H   | 1 UNL1 | 0.1497  |
| 11 H | 6.1965 | -0.6574 | -10.7621 H   | 1 UNL1 | 0.1519  |
| 12 H | 6.7539 | -0.8392 | -12.4310 H   | 1 UNL1 | 0.1555  |
| 13 H | 4.2823 | 3.1581  | -11.6351 H   | 1 UNL1 | 0.1403  |
| 14 H | 3.0722 | 1.7132  | -9.7487 H    | 1 UNL1 | 0.1371  |
| 15 H | 2.0318 | 2.4564  | -10.9889 H   | 1 UNL1 | 0.1313  |
| 16 H | 1.5017 | 0.0020  | -10.5847 H   | 1 UNL1 | 0.1287  |
| 17 H | 1.8855 | 0.3842  | -12.2823 H   | 1 UNL1 | 0.1378  |
| 18 H | 3.9214 | -0.6504 | -10.2083 H   | 1 UNL1 | 0.1241  |
| 19 H | 6.9521 | 1.5832  | -12.5264 H   | 1 UNL1 | 0.1422  |
| 20 H | 5.8940 | 2.7813  | -13.2905 H   | 1 UNL1 | 0.1369  |
| 21 H | 4.6917 | -1.6784 | -13.9283 H   | 1 UNL1 | 0.1445  |
| 22 H | 3.1565 | -0.8010 | -13.8061 H   | 1 UNL1 | 0.1383  |
| 23 H | 3.9777 | 1.2104  | -14.7489 H   | 1 UNL1 | 0.1379  |
| 24 H | 6.4172 | 1.6190  | -15.2285 H   | 1 UNL1 | 0.1316  |
| 25 H | 6.8227 | 0.1186  | -14.3657 H   | 1 UNL1 | 0.1350  |
| 26 C | 5.6321 | -0.7390 | -16.8508 C.2 | 1 UNL1 | -0.4544 |
| 27 C | 3.1992 | -0.3306 | -16.7350 C.3 | 1 UNL1 | -0.5117 |
| 28 C | 4.5848 | -0.2638 | -16.1648 C.2 | 1 UNL1 | 0.1332  |
| 29 C | 2.9197 | -2.1209 | -11.4091 C.3 | 1 UNL1 | -0.4872 |
| 30 C | 5.8959 | -1.0107 | -11.7637 C.3 | 1 UNL1 | -0.5094 |
| 31 C | 4.0562 | 2.0892  | -11.6046 C.2 | 1 UNL1 | -0.2391 |
| 32 C | 2.8327 | 1.7034  | -10.8447 C.3 | 1 UNL1 | -0.2423 |
| 33 C | 2.3180 | 0.3243  | -11.2619 C.3 | 1 UNL1 | -0.2839 |
| 34 C | 3.4707 | -0.6983 | -11.2380 C.3 | 1 UNL1 | -0.0701 |
| 35 C | 6.0004 | 1.6939  | -13.0873 C.3 | 1 UNL1 | -0.2870 |
| 36 C | 4.8453 | 1.2089  | -12.2398 C.2 | 1 UNL1 | 0.0116  |
| 37 C | 4.6058 | -0.2975 | -12.2424 C.3 | 1 UNL1 | 0.1436  |
| 38 C | 4.2542 | -0.6858 | -13.7072 C.3 | 1 UNL1 | -0.3119 |
| 39 C | 4.6925 | 0.3449  | -14.7757 C.3 | 1 UNL1 | -0.1058 |

@<TRIPOS>BOND

1 3 26 1  
 2 5 27 1  
 3 26 2 1  
 4 26 28 2

5 6 27 1  
 6 27 28 1  
 7 27 4 1  
 8 28 39 1  
 9 24 1 1  
 10 39 23 1  
 11 39 1 1  
 12 39 38 1  
 13 1 25 1  
 14 1 35 1  
 15 21 38 1  
 16 22 38 1  
 17 38 37 1  
 18 20 35 1  
 19 35 19 1  
 20 35 36 1  
 21 12 30 1  
 22 7 29 1  
 23 17 33 1  
 24 37 36 1  
 25 37 30 1  
 26 37 34 1  
 27 36 31 2  
 28 30 10 1  
 29 30 11 1  
 30 13 31 1  
 31 31 32 1  
 32 29 9 1  
 33 29 34 1  
 34 29 8 1  
 35 33 34 1  
 36 33 32 1  
 37 33 16 1  
 38 34 18 1  
 39 15 32 1  
 40 32 14 1

### Compound 39

@<TRIPOS>MOLECULE

compuesto\_39.out

39 40 0 0 0

SMALL

MULLIKEN\_CHARGES

@<TRIPOS>ATOM

|      |        |         |              |        |         |
|------|--------|---------|--------------|--------|---------|
| 1 C  | 5.2502 | 1.4296  | -14.9186 C.3 | 1 UNL1 | -0.2663 |
| 2 H  | 4.5737 | -0.9624 | -17.8576 H   | 1 UNL1 | 0.1626  |
| 3 H  | 6.2851 | -0.8671 | -18.3277 H   | 1 UNL1 | 0.1621  |
| 4 H  | 3.5218 | 2.9773  | -11.4651 H   | 1 UNL1 | 0.1278  |
| 5 H  | 2.2319 | 1.8377  | -11.8885 H   | 1 UNL1 | 0.1374  |
| 6 H  | 4.4045 | 1.5972  | -9.7206 H    | 1 UNL1 | 0.1354  |
| 7 H  | 2.6326 | 1.4031  | -9.5563 H    | 1 UNL1 | 0.1324  |
| 8 H  | 3.6879 | -0.8480 | -9.3967 H    | 1 UNL1 | 0.1401  |
| 9 H  | 4.5569 | 3.0981  | -13.7163 H   | 1 UNL1 | 0.1283  |
| 10 H | 3.2428 | 2.1144  | -14.3904 H   | 1 UNL1 | 0.1338  |
| 11 H | 5.2407 | 1.2566  | -12.2051 H   | 1 UNL1 | 0.1299  |
| 12 H | 5.8461 | -0.8169 | -13.3438 H   | 1 UNL1 | 0.1436  |
| 13 H | 4.6220 | -1.8903 | -14.0695 H   | 1 UNL1 | 0.1405  |
| 14 H | 3.9124 | -0.1159 | -15.6458 H   | 1 UNL1 | 0.1322  |
| 15 H | 5.2402 | 2.0007  | -15.8715 H   | 1 UNL1 | 0.1270  |
| 16 H | 6.2807 | 1.5183  | -14.5128 H   | 1 UNL1 | 0.1388  |
| 17 C | 4.0179 | -2.4610 | -11.4905 C.3 | 1 UNL1 | -0.4864 |
| 18 C | 2.3824 | -0.4428 | -13.3956 C.3 | 1 UNL1 | -0.4993 |
| 19 C | 7.0557 | -1.2406 | -15.8506 C.2 | 1 UNL1 | -0.4492 |
| 20 C | 5.5313 | -0.4551 | -17.6353 C.3 | 1 UNL1 | -0.5103 |
| 21 C | 5.9079 | -0.6373 | -16.1860 C.2 | 1 UNL1 | 0.1275  |

|               |        |         |              |        |         |
|---------------|--------|---------|--------------|--------|---------|
| 22 C          | 3.2927 | 1.8958  | -11.5702 C.3 | 1 UNL1 | -0.2854 |
| 23 C          | 3.4960 | 1.1878  | -10.2214 C.3 | 1 UNL1 | -0.2388 |
| 24 C          | 3.6795 | -0.2988 | -10.3456 C.2 | 1 UNL1 | -0.2347 |
| 25 C          | 3.8550 | -0.9640 | -11.4997 C.2 | 1 UNL1 | 0.0227  |
| 26 C          | 4.2508 | 2.0517  | -13.9320 C.3 | 1 UNL1 | -0.2812 |
| 27 C          | 4.9292 | -0.0548 | -15.1792 C.3 | 1 UNL1 | -0.1014 |
| 28 H          | 1.6176 | -0.1833 | -12.6437 H   | 1 UNL1 | 0.1557  |
| 29 H          | 3.2556 | -2.9485 | -12.1231 H   | 1 UNL1 | 0.1596  |
| 30 H          | 5.0206 | -2.7533 | -11.8552 H   | 1 UNL1 | 0.1608  |
| 31 H          | 3.9024 | -2.8918 | -10.4826 H   | 1 UNL1 | 0.1537  |
| 32 H          | 7.7368 | -1.6307 | -16.6041 H   | 1 UNL1 | 0.1568  |
| 33 H          | 2.1765 | 0.1652  | -14.2896 H   | 1 UNL1 | 0.1507  |
| 34 H          | 2.2042 | -1.4968 | -13.6750 H   | 1 UNL1 | 0.1479  |
| 35 H          | 5.4193 | 0.6130  | -17.8730 H   | 1 UNL1 | 0.1626  |
| 36 H          | 7.3734 | -1.3714 | -14.8356 H   | 1 UNL1 | 0.1583  |
| 37 C          | 4.2001 | 1.2454  | -12.6248 C.3 | 1 UNL1 | -0.0956 |
| 38 C          | 3.8152 | -0.2467 | -12.8526 C.3 | 1 UNL1 | 0.1415  |
| 39 C          | 4.8563 | -0.8302 | -13.8450 C.3 | 1 UNL1 | -0.3210 |
| @<TRIPOS>BOND |        |         |              |        |         |
| 1             | 3      | 20      | 1            |        |         |
| 2             | 35     | 20      | 1            |        |         |
| 3             | 2      | 20      | 1            |        |         |
| 4             | 20     | 21      | 1            |        |         |
| 5             | 32     | 19      | 1            |        |         |
| 6             | 21     | 19      | 2            |        |         |
| 7             | 21     | 27      | 1            |        |         |
| 8             | 15     | 1       | 1            |        |         |
| 9             | 19     | 36      | 1            |        |         |
| 10            | 14     | 27      | 1            |        |         |
| 11            | 27     | 1       | 1            |        |         |
| 12            | 27     | 39      | 1            |        |         |
| 13            | 1      | 16      | 1            |        |         |
| 14            | 1      | 26      | 1            |        |         |
| 15            | 10     | 26      | 1            |        |         |
| 16            | 33     | 18      | 1            |        |         |
| 17            | 13     | 39      | 1            |        |         |
| 18            | 26     | 9       | 1            |        |         |
| 19            | 26     | 37      | 1            |        |         |
| 20            | 39     | 12      | 1            |        |         |
| 21            | 39     | 38      | 1            |        |         |
| 22            | 34     | 18      | 1            |        |         |
| 23            | 18     | 38      | 1            |        |         |
| 24            | 18     | 28      | 1            |        |         |
| 25            | 38     | 37      | 1            |        |         |
| 26            | 38     | 25      | 1            |        |         |
| 27            | 37     | 11      | 1            |        |         |
| 28            | 37     | 22      | 1            |        |         |
| 29            | 29     | 17      | 1            |        |         |
| 30            | 5      | 22      | 1            |        |         |
| 31            | 30     | 17      | 1            |        |         |
| 32            | 22     | 4       | 1            |        |         |
| 33            | 22     | 23      | 1            |        |         |
| 34            | 25     | 17      | 1            |        |         |
| 35            | 25     | 24      | 2            |        |         |
| 36            | 17     | 31      | 1            |        |         |
| 37            | 24     | 23      | 1            |        |         |
| 38            | 24     | 8       | 1            |        |         |
| 39            | 23     | 6       | 1            |        |         |
| 40            | 23     | 7       | 1            |        |         |

Compound 40

@<TRIPOS>MOLECULE

compuesto\_40.out

39 40 0 0 0

SMALL

MULLIKEN CHARGES

@<TRIPOS>ATOM

|      |        |         |              |        |         |
|------|--------|---------|--------------|--------|---------|
| 1 C  | 4.3022 | 2.0465  | -14.2589 C.2 | 1 UNL1 | 0.1329  |
| 2 C  | 4.7603 | 1.7249  | -12.8450 C.3 | 1 UNL1 | -0.1215 |
| 3 C  | 4.6807 | 0.2122  | -12.4634 C.3 | 1 UNL1 | -0.0720 |
| 4 C  | 5.0509 | -0.7456 | -13.6258 C.3 | 1 UNL1 | -0.1299 |
| 5 C  | 4.2716 | -0.3879 | -14.8956 C.3 | 1 UNL1 | -0.2476 |
| 6 H  | 2.2356 | 0.2989  | -8.7224 H    | 1 UNL1 | 0.1597  |
| 7 H  | 1.1597 | 1.1986  | -9.8233 H    | 1 UNL1 | 0.1625  |
| 8 H  | 6.2553 | -4.0507 | -13.5097 H   | 1 UNL1 | 0.1496  |
| 9 H  | 6.3226 | -2.9268 | -14.8827 H   | 1 UNL1 | 0.1512  |
| 10 H | 7.1922 | -2.5528 | -13.3735 H   | 1 UNL1 | 0.1456  |
| 11 H | 3.7542 | -4.0458 | -13.3131 H   | 1 UNL1 | 0.1453  |
| 12 H | 2.8242 | -2.5414 | -13.4220 H   | 1 UNL1 | 0.1503  |
| 13 H | 3.7446 | -3.1248 | -14.8261 H   | 1 UNL1 | 0.1500  |
| 14 C | 4.6348 | 1.0355  | -15.3293 C.3 | 1 UNL1 | -0.3171 |
| 15 H | 1.3938 | -0.5519 | -10.0342 H   | 1 UNL1 | 0.1589  |
| 16 H | 5.0261 | -2.3287 | -12.1314 H   | 1 UNL1 | 0.1163  |
| 17 H | 3.5263 | 4.0147  | -13.9217 H   | 1 UNL1 | 0.1588  |
| 18 H | 3.4703 | 3.4434  | -15.6279 H   | 1 UNL1 | 0.1568  |
| 19 H | 4.6192 | 3.5652  | -11.6505 H   | 1 UNL1 | 0.1270  |
| 20 H | 3.0425 | 2.8716  | -12.1161 H   | 1 UNL1 | 0.1483  |
| 21 H | 4.8495 | 1.6669  | -9.9372 H    | 1 UNL1 | 0.1445  |
| 22 H | 3.3489 | 2.6033  | -9.7139 H    | 1 UNL1 | 0.1386  |
| 23 H | 2.8549 | -0.9955 | -11.9603 H   | 1 UNL1 | 0.1517  |
| 24 H | 6.1370 | -0.5155 | -13.8480 H   | 1 UNL1 | 0.1252  |
| 25 H | 3.1787 | -0.4599 | -14.7190 H   | 1 UNL1 | 0.1444  |
| 26 H | 4.5260 | -1.0910 | -15.7146 H   | 1 UNL1 | 0.1276  |
| 27 H | 4.1174 | 1.2716  | -16.2826 H   | 1 UNL1 | 0.1446  |
| 28 H | 5.7222 | 1.1037  | -15.5499 H   | 1 UNL1 | 0.1451  |
| 29 C | 3.7652 | -3.0234 | -13.7281 C.3 | 1 UNL1 | -0.4900 |
| 30 C | 6.2656 | -2.9810 | -13.7829 C.3 | 1 UNL1 | -0.5010 |
| 31 C | 1.9045 | 0.3857  | -9.7696 C.3  | 1 UNL1 | -0.4949 |
| 32 H | 5.4879 | 0.0595  | -11.6930 H   | 1 UNL1 | 0.1216  |
| 33 H | 5.8535 | 1.9838  | -12.8420 H   | 1 UNL1 | 0.1284  |
| 34 C | 5.0104 | -2.2574 | -13.2480 C.3 | 1 UNL1 | 0.0006  |
| 35 C | 3.7452 | 3.2121  | -14.6137 C.2 | 1 UNL1 | -0.4754 |
| 36 C | 4.0702 | 2.6106  | -11.7715 C.3 | 1 UNL1 | -0.2587 |
| 37 C | 3.8769 | 1.9202  | -10.4079 C.3 | 1 UNL1 | -0.2959 |
| 38 C | 3.0691 | 0.6717  | -10.6652 C.2 | 1 UNL1 | 0.0759  |
| 39 C | 3.4160 | -0.1003 | -11.7060 C.2 | 1 UNL1 | -0.2572 |

@<TRIPOS>BOND

|    |    |    |   |
|----|----|----|---|
| 1  | 27 | 14 | 1 |
| 2  | 26 | 5  | 1 |
| 3  | 18 | 35 | 1 |
| 4  | 28 | 14 | 1 |
| 5  | 14 | 5  | 1 |
| 6  | 14 | 1  | 1 |
| 7  | 5  | 25 | 1 |
| 8  | 5  | 4  | 1 |
| 9  | 9  | 30 | 1 |
| 10 | 13 | 29 | 1 |
| 11 | 35 | 1  | 2 |
| 12 | 35 | 17 | 1 |
| 13 | 1  | 2  | 1 |
| 14 | 24 | 4  | 1 |
| 15 | 30 | 8  | 1 |
| 16 | 30 | 10 | 1 |
| 17 | 30 | 34 | 1 |
| 18 | 29 | 12 | 1 |
| 19 | 29 | 11 | 1 |
| 20 | 29 | 34 | 1 |
| 21 | 4  | 34 | 1 |
| 22 | 4  | 3  | 1 |
| 23 | 34 | 16 | 1 |
| 24 | 2  | 33 | 1 |

25 2 3 1  
 26 2 36 1  
 27 3 39 1  
 28 3 32 1  
 29 20 36 1  
 30 23 39 1  
 31 36 19 1  
 32 36 37 1  
 33 39 38 2  
 34 38 37 1  
 35 38 31 1  
 36 37 21 1  
 37 37 22 1  
 38 15 31 1  
 39 7 31 1  
 40 31 6 1

## Compound 41

@<TRIPOS>MOLECULE  
 compuesto\_41.out  
 39 40 0 0 0  
 SMALL  
 MULLIKEN\_CHARGES

@<TRIPOS>ATOM

|      |        |         |              |        |         |
|------|--------|---------|--------------|--------|---------|
| 1 H  | 3.7165 | 2.7411  | -16.2888 H   | 1 UNL1 | 0.1554  |
| 2 H  | 3.4312 | 2.2590  | -14.5557 H   | 1 UNL1 | 0.1621  |
| 3 H  | 5.5867 | -0.0075 | -17.2526 H   | 1 UNL1 | 0.1634  |
| 4 H  | 5.3642 | 1.7061  | -17.6513 H   | 1 UNL1 | 0.1627  |
| 5 H  | 6.8039 | 1.1915  | -16.7355 H   | 1 UNL1 | 0.1623  |
| 6 C  | 5.4107 | 0.2720  | -14.4371 C.3 | 1 UNL1 | -0.1127 |
| 7 H  | 2.8580 | -1.6457 | -9.4925 H    | 1 UNL1 | 0.1361  |
| 8 H  | 5.6039 | -1.2583 | -10.8326 H   | 1 UNL1 | 0.1389  |
| 9 H  | 4.6500 | -2.7583 | -10.7542 H   | 1 UNL1 | 0.1314  |
| 10 H | 5.9877 | 0.4892  | -12.3363 H   | 1 UNL1 | 0.1356  |
| 11 H | 5.1774 | 1.9017  | -12.9910 H   | 1 UNL1 | 0.1384  |
| 12 H | 5.2876 | -1.6597 | -15.4580 H   | 1 UNL1 | 0.1237  |
| 13 H | 5.8734 | -1.9939 | -13.0151 H   | 1 UNL1 | 0.1373  |
| 14 H | 4.5016 | -2.9798 | -13.5352 H   | 1 UNL1 | 0.1350  |
| 15 H | 3.7082 | -1.0028 | -14.9697 H   | 1 UNL1 | 0.1405  |
| 16 H | 6.5214 | 0.1566  | -14.5203 H   | 1 UNL1 | 0.1254  |
| 17 C | 2.5089 | -1.9050 | -12.3212 C.3 | 1 UNL1 | -0.5229 |
| 18 H | 3.0241 | 0.4531  | -13.1360 H   | 1 UNL1 | 0.1430  |
| 19 C | 5.7222 | 1.0173  | -16.8626 C.3 | 1 UNL1 | -0.5130 |
| 20 C | 4.0007 | 2.1050  | -15.4566 C.2 | 1 UNL1 | -0.4529 |
| 21 C | 4.9830 | 1.2020  | -15.5650 C.2 | 1 UNL1 | 0.1335  |
| 22 C | 3.0373 | 2.4049  | -11.2697 C.3 | 1 UNL1 | -0.4976 |
| 23 C | 3.4625 | 0.9651  | -11.1204 C.2 | 1 UNL1 | 0.0663  |
| 24 C | 3.4319 | 0.3711  | -9.9186 C.2  | 1 UNL1 | -0.2472 |
| 25 C | 3.7914 | -1.0612 | -9.6822 C.3  | 1 UNL1 | -0.2258 |
| 26 C | 4.5685 | -1.6581 | -10.8630 C.3 | 1 UNL1 | -0.3208 |
| 27 C | 5.1534 | 0.7950  | -13.0028 C.3 | 1 UNL1 | -0.2748 |
| 28 C | 3.8458 | 0.2453  | -12.3977 C.3 | 1 UNL1 | -0.1433 |
| 29 C | 3.9305 | -1.3070 | -12.2297 C.3 | 1 UNL1 | 0.1923  |
| 30 C | 4.8128 | -1.9314 | -13.3490 C.3 | 1 UNL1 | -0.3236 |
| 31 C | 4.7632 | -1.1167 | -14.6453 C.3 | 1 UNL1 | -0.2540 |
| 32 H | 4.4082 | -1.1538 | -8.7630 H    | 1 UNL1 | 0.1282  |
| 33 H | 3.1107 | 0.9315  | -9.0357 H    | 1 UNL1 | 0.1410  |
| 34 H | 2.6732 | 2.8336  | -10.3284 H   | 1 UNL1 | 0.1554  |
| 35 H | 3.8795 | 3.0399  | -11.5993 H   | 1 UNL1 | 0.1616  |
| 36 H | 2.2244 | 2.5026  | -12.0054 H   | 1 UNL1 | 0.1596  |
| 37 H | 2.0865 | -1.7873 | -13.3339 H   | 1 UNL1 | 0.1503  |
| 38 H | 2.5127 | -2.9829 | -12.0907 H   | 1 UNL1 | 0.1491  |
| 39 H | 1.8131 | -1.4173 | -11.6243 H   | 1 UNL1 | 0.1599  |

@<TRIPOS>BOND

1 4 19 1

2 3 19 1  
 3 19 5 1  
 4 19 21 1  
 5 1 20 1  
 6 21 20 2  
 7 21 6 1  
 8 12 31 1  
 9 20 2 1  
 10 15 31 1  
 11 31 6 1  
 12 31 30 1  
 13 16 6 1  
 14 6 27 1  
 15 14 30 1  
 16 30 13 1  
 17 30 29 1  
 18 37 17 1  
 19 18 28 1  
 20 27 11 1  
 21 27 28 1  
 22 27 10 1  
 23 28 29 1  
 24 28 23 1  
 25 17 29 1  
 26 17 38 1  
 27 17 39 1  
 28 29 26 1  
 29 36 22 1  
 30 35 22 1  
 31 22 23 1  
 32 22 34 1  
 33 23 24 2  
 34 26 8 1  
 35 26 9 1  
 36 26 25 1  
 37 24 25 1  
 38 24 33 1  
 39 25 7 1  
 40 25 32 1

## Compound 42

@<TRIPOS>MOLECULE

compuesto\_42.out

39 40 0 0 0

SMALL

MULLIKEN\_CHARGES

@<TRIPOS>ATOM

|      |        |         |          |     |   |      |         |
|------|--------|---------|----------|-----|---|------|---------|
| 1 C  | 4.5693 | -0.4535 | -12.1725 | C.2 | 1 | UNL1 | -0.2521 |
| 2 C  | 5.5328 | 1.3727  | -15.5107 | C.3 | 1 | UNL1 | -0.2753 |
| 3 C  | 4.1321 | 0.1515  | -11.0559 | C.2 | 1 | UNL1 | 0.0736  |
| 4 C  | 3.0423 | 1.1879  | -11.1834 | C.3 | 1 | UNL1 | -0.2915 |
| 5 C  | 3.3155 | 2.1199  | -12.3821 | C.3 | 1 | UNL1 | -0.2550 |
| 6 C  | 4.6307 | -0.1889 | -9.6834  | C.3 | 1 | UNL1 | -0.4938 |
| 7 C  | 4.7586 | 3.5973  | -14.5884 | C.3 | 1 | UNL1 | -0.4808 |
| 8 H  | 2.8510 | -0.3545 | -13.4444 | H   | 1 | UNL1 | 0.1339  |
| 9 C  | 4.6403 | -2.3322 | -14.6269 | C.3 | 1 | UNL1 | 0.0015  |
| 10 C | 4.9468 | -2.9949 | -15.9859 | C.3 | 1 | UNL1 | -0.4972 |
| 11 C | 3.3702 | -2.9855 | -14.0482 | C.3 | 1 | UNL1 | -0.4965 |
| 12 H | 6.5055 | 1.8966  | -15.6502 | H   | 1 | UNL1 | 0.1371  |
| 13 H | 4.9972 | 1.4238  | -16.4866 | H   | 1 | UNL1 | 0.1386  |
| 14 H | 6.5287 | -0.1336 | -14.2824 | H   | 1 | UNL1 | 0.1412  |
| 15 H | 6.3122 | -0.5837 | -15.9962 | H   | 1 | UNL1 | 0.1264  |
| 16 H | 3.7792 | -0.5983 | -15.5820 | H   | 1 | UNL1 | 0.1283  |
| 17 H | 5.3456 | -1.2169 | -12.1435 | H   | 1 | UNL1 | 0.1502  |
| 18 H | 2.0755 | 0.6510  | -11.3125 | H   | 1 | UNL1 | 0.1437  |

|                    |        |         |              |        |         |
|--------------------|--------|---------|--------------|--------|---------|
| 19 H               | 2.9457 | 1.7878  | -10.2545 H   | 1 UNL1 | 0.1373  |
| 20 H               | 2.3649 | 2.5792  | -12.7281 H   | 1 UNL1 | 0.1361  |
| 21 H               | 3.9819 | 2.9357  | -12.0188 H   | 1 UNL1 | 0.1427  |
| 22 H               | 5.4081 | -0.9730 | -9.6990 H    | 1 UNL1 | 0.1590  |
| 23 H               | 5.0680 | 0.7048  | -9.1988 H    | 1 UNL1 | 0.1620  |
| 24 H               | 3.7968 | -0.5556 | -9.0544 H    | 1 UNL1 | 0.1592  |
| 25 H               | 4.0280 | 4.1194  | -13.9419 H   | 1 UNL1 | 0.1538  |
| 26 H               | 5.7678 | 3.9706  | -14.3266 H   | 1 UNL1 | 0.1579  |
| 27 H               | 4.5361 | 3.9076  | -15.6274 H   | 1 UNL1 | 0.1549  |
| 28 H               | 5.4930 | -2.5624 | -13.9431 H   | 1 UNL1 | 0.1122  |
| 29 H               | 5.9187 | -2.6745 | -16.4036 H   | 1 UNL1 | 0.1462  |
| 30 H               | 4.9983 | -4.0978 | -15.8893 H   | 1 UNL1 | 0.1478  |
| 31 H               | 4.1628 | -2.7670 | -16.7298 H   | 1 UNL1 | 0.1502  |
| 32 H               | 3.1727 | -2.6679 | -13.0067 H   | 1 UNL1 | 0.1550  |
| 33 H               | 2.4819 | -2.7409 | -14.6575 H   | 1 UNL1 | 0.1490  |
| 34 H               | 3.4621 | -4.0890 | -14.0233 H   | 1 UNL1 | 0.1461  |
| 35 C               | 4.7106 | 2.0967  | -14.4734 C.2 | 1 UNL1 | 0.0069  |
| 36 C               | 4.0084 | 1.4299  | -13.5391 C.2 | 1 UNL1 | -0.0529 |
| 37 C               | 3.9381 | -0.0856 | -13.4934 C.3 | 1 UNL1 | -0.0660 |
| 38 C               | 4.5059 | -0.7897 | -14.7496 C.3 | 1 UNL1 | -0.1214 |
| 39 C               | 5.8176 | -0.0891 | -15.1354 C.3 | 1 UNL1 | -0.2684 |
| @@<TRIPOS>BOND     |        |         |              |        |         |
| 1                  | 31     | 10      | 1            |        |         |
| 2                  | 13     | 2       | 1            |        |         |
| 3                  | 29     | 10      | 1            |        |         |
| 4                  | 15     | 39      | 1            |        |         |
| 5                  | 10     | 30      | 1            |        |         |
| 6                  | 10     | 9       | 1            |        |         |
| 7                  | 12     | 2       | 1            |        |         |
| 8                  | 27     | 7       | 1            |        |         |
| 9                  | 16     | 38      | 1            |        |         |
| 10                 | 2      | 39      | 1            |        |         |
| 11                 | 2      | 35      | 1            |        |         |
| 12                 | 39     | 38      | 1            |        |         |
| 13                 | 39     | 14      | 1            |        |         |
| 14                 | 38     | 9       | 1            |        |         |
| 15                 | 38     | 37      | 1            |        |         |
| 16                 | 33     | 11      | 1            |        |         |
| 17                 | 9      | 11      | 1            |        |         |
| 18                 | 9      | 28      | 1            |        |         |
| 19                 | 7      | 35      | 1            |        |         |
| 20                 | 7      | 26      | 1            |        |         |
| 21                 | 7      | 25      | 1            |        |         |
| 22                 | 35     | 36      | 2            |        |         |
| 23                 | 11     | 34      | 1            |        |         |
| 24                 | 11     | 32      | 1            |        |         |
| 25                 | 36     | 37      | 1            |        |         |
| 26                 | 36     | 5       | 1            |        |         |
| 27                 | 37     | 8       | 1            |        |         |
| 28                 | 37     | 1       | 1            |        |         |
| 29                 | 20     | 5       | 1            |        |         |
| 30                 | 5      | 21      | 1            |        |         |
| 31                 | 5      | 4       | 1            |        |         |
| 32                 | 1      | 17      | 1            |        |         |
| 33                 | 1      | 3       | 2            |        |         |
| 34                 | 18     | 4       | 1            |        |         |
| 35                 | 4      | 3       | 1            |        |         |
| 36                 | 4      | 19      | 1            |        |         |
| 37                 | 3      | 6       | 1            |        |         |
| 38                 | 22     | 6       | 1            |        |         |
| 39                 | 6      | 23      | 1            |        |         |
| 40                 | 6      | 24      | 1            |        |         |
| Compound 43        |        |         |              |        |         |
| @@<TRIPOS>MOLECULE |        |         |              |        |         |
| compuesto_43.out   |        |         |              |        |         |

40 42 0 0 0  
SMALL  
MULLIKEN\_CHARGES

@<TRIPOS>ATOM

|    |   |        |         |          |     |   |      |         |
|----|---|--------|---------|----------|-----|---|------|---------|
| 1  | C | 3.2328 | 1.3531  | -10.8929 | C.3 | 1 | UNL1 | -0.2240 |
| 2  | C | 2.6310 | 0.0286  | -11.2973 | C.3 | 1 | UNL1 | -0.2103 |
| 3  | C | 3.2133 | -0.6664 | -12.5161 | C.3 | 1 | UNL1 | -0.2072 |
| 4  | H | 6.3369 | 1.7435  | -14.2169 | H   | 1 | UNL1 | 0.1364  |
| 5  | H | 5.3703 | 1.9768  | -15.7015 | H   | 1 | UNL1 | 0.1341  |
| 6  | H | 2.8445 | 3.3989  | -11.4673 | H   | 1 | UNL1 | 0.1410  |
| 7  | H | 1.9901 | 2.2136  | -12.4751 | H   | 1 | UNL1 | 0.1532  |
| 8  | H | 4.3179 | 1.3029  | -10.6727 | H   | 1 | UNL1 | 0.1379  |
| 9  | H | 2.7838 | 1.6605  | -9.9376  | H   | 1 | UNL1 | 0.1265  |
| 10 | H | 2.4901 | -1.0984 | -13.2277 | H   | 1 | UNL1 | 0.1708  |
| 11 | H | 1.5386 | 0.0297  | -11.1848 | H   | 1 | UNL1 | 0.1456  |
| 12 | O | 3.8823 | -1.5116 | -15.0971 | O.3 | 1 | UNL1 | -0.5900 |
| 13 | C | 5.7475 | -2.2332 | -13.7754 | C.3 | 1 | UNL1 | -0.5798 |
| 14 | H | 3.3265 | 1.1846  | -14.5939 | H   | 1 | UNL1 | 0.1555  |
| 15 | H | 5.2375 | 0.0568  | -12.4393 | H   | 1 | UNL1 | 0.1417  |
| 16 | C | 4.6361 | -1.4243 | -10.3842 | C.3 | 1 | UNL1 | -0.4852 |
| 17 | C | 2.4461 | -2.5403 | -10.9086 | C.3 | 1 | UNL1 | -0.4942 |
| 18 | C | 3.3290 | -1.3276 | -11.1327 | C.3 | 1 | UNL1 | 0.1183  |
| 19 | C | 4.6977 | 3.6225  | -13.2204 | C.2 | 1 | UNL1 | -0.4668 |
| 20 | C | 4.9896 | -1.0256 | -14.3148 | C.3 | 1 | UNL1 | 0.3965  |
| 21 | C | 5.8404 | -0.1120 | -15.2297 | C.3 | 1 | UNL1 | -0.3876 |
| 22 | C | 5.5012 | 1.3297  | -14.8206 | C.3 | 1 | UNL1 | -0.2519 |
| 23 | C | 4.4260 | -0.0932 | -13.2026 | C.3 | 1 | UNL1 | -0.1164 |
| 24 | C | 4.2262 | 1.2646  | -13.9336 | C.3 | 1 | UNL1 | -0.1230 |
| 25 | C | 4.0299 | 2.4763  | -13.0467 | C.2 | 1 | UNL1 | 0.1223  |
| 26 | C | 2.9627 | 2.4124  | -11.9764 | C.3 | 1 | UNL1 | -0.3047 |
| 27 | H | 6.9134 | -0.2972 | -15.0828 | H   | 1 | UNL1 | 0.1459  |
| 28 | H | 5.6231 | -0.3065 | -16.2972 | H   | 1 | UNL1 | 0.1502  |
| 29 | H | 5.4438 | 3.8135  | -13.9627 | H   | 1 | UNL1 | 0.1574  |
| 30 | H | 4.5392 | 4.4907  | -12.6089 | H   | 1 | UNL1 | 0.1553  |
| 31 | H | 2.1959 | -2.6378 | -9.8379  | H   | 1 | UNL1 | 0.1560  |
| 32 | H | 1.4891 | -2.4709 | -11.4518 | H   | 1 | UNL1 | 0.1551  |
| 33 | H | 2.9437 | -3.4536 | -11.2834 | H   | 1 | UNL1 | 0.1581  |
| 34 | H | 5.1922 | -2.3175 | -10.6451 | H   | 1 | UNL1 | 0.1518  |
| 35 | H | 5.2998 | -0.5644 | -10.5667 | H   | 1 | UNL1 | 0.1560  |
| 36 | H | 4.4660 | -1.5187 | -9.3101  | H   | 1 | UNL1 | 0.1559  |
| 37 | H | 6.5717 | -1.9151 | -13.1225 | H   | 1 | UNL1 | 0.1665  |
| 38 | H | 5.0751 | -2.8655 | -13.1738 | H   | 1 | UNL1 | 0.1825  |
| 39 | H | 6.1452 | -2.8521 | -14.5987 | H   | 1 | UNL1 | 0.1598  |
| 40 | H | 4.2060 | -2.0239 | -15.8678 | H   | 1 | UNL1 | 0.3108  |

@<TRIPOS>BOND

|    |    |    |   |
|----|----|----|---|
| 1  | 28 | 21 | 1 |
| 2  | 40 | 12 | 1 |
| 3  | 5  | 22 | 1 |
| 4  | 21 | 27 | 1 |
| 5  | 21 | 22 | 1 |
| 6  | 21 | 20 | 1 |
| 7  | 12 | 20 | 1 |
| 8  | 22 | 4  | 1 |
| 9  | 22 | 24 | 1 |
| 10 | 39 | 13 | 1 |
| 11 | 14 | 24 | 1 |
| 12 | 20 | 13 | 1 |
| 13 | 20 | 23 | 1 |
| 14 | 29 | 19 | 1 |
| 15 | 24 | 23 | 1 |
| 16 | 24 | 25 | 1 |
| 17 | 13 | 38 | 1 |
| 18 | 13 | 37 | 1 |
| 19 | 10 | 3  | 1 |
| 20 | 19 | 25 | 2 |



21 19 30 1  
 22 23 3 1  
 23 23 15 1  
 24 25 26 1  
 25 3 2 1  
 26 3 18 1  
 27 7 26 1  
 28 26 6 1  
 29 26 1 1  
 30 32 17 1  
 31 2 11 1  
 32 2 18 1  
 33 2 1 1  
 34 33 17 1  
 35 18 17 1  
 36 18 16 1  
 37 17 31 1  
 38 1 8 1  
 39 1 9 1  
 40 34 16 1  
 41 35 16 1  
 42 16 36 1

### Compound 44

@@<TRIPOS>MOLECULE  
 compuesto\_44.out  
 40 42 0 0 0  
 SMALL  
 MULLIKEN\_CHARGES

@@<TRIPOS>ATOM  
 1 C 3.4238 0.3401 -12.6516 C.3 1 UNL1 -0.1481  
 2 H 6.2208 0.7716 -15.7505 H 1 UNL1 0.1458  
 3 H 5.0590 1.1382 -16.9501 H 1 UNL1 0.1456  
 4 H 2.3909 -1.3815 -11.9023 H 1 UNL1 0.1352  
 5 H 4.1591 -1.4042 -11.5713 H 1 UNL1 0.1413  
 6 C 5.9724 -2.8573 -12.9885 C.3 1 UNL1 -0.5320  
 7 H 6.7007 -1.7508 -15.3483 H 1 UNL1 0.1383  
 8 H 2.4453 0.6249 -13.0947 H 1 UNL1 0.1372  
 9 H 5.5037 0.3229 -13.4018 H 1 UNL1 0.1407  
 10 C 2.6142 2.0849 -10.9048 C.3 1 UNL1 -0.5232  
 11 C 4.7206 0.7703 -10.3925 C.3 1 UNL1 -0.5149  
 12 C 3.2329 1.9834 -15.3137 C.2 1 UNL1 -0.4436  
 13 O 5.0738 -3.1324 -15.2993 O.3 1 UNL1 -0.4897  
 14 C 4.6271 2.1560 -12.5456 C.3 1 UNL1 -0.3553  
 15 C 3.8089 1.3413 -11.4930 C.3 1 UNL1 0.1891  
 16 C 3.5828 -2.0467 -13.5777 C.3 1 UNL1 -0.3140  
 17 C 5.0077 -2.3173 -14.0155 C.3 1 UNL1 0.2800  
 18 C 5.6028 -1.7916 -15.2758 C.3 1 UNL1 0.0348  
 19 C 4.8769 -0.8694 -16.2361 C.3 1 UNL1 -0.2817  
 20 C 5.1620 0.6096 -15.9891 C.3 1 UNL1 -0.3070  
 21 C 4.2654 1.2243 -14.9441 C.2 1 UNL1 0.1173  
 22 C 4.5851 0.9360 -13.5057 C.3 1 UNL1 -0.1311  
 23 C 3.4004 -1.1499 -12.3458 C.3 1 UNL1 -0.2572  
 24 H 3.7689 -1.0569 -16.3244 H 1 UNL1 0.1640  
 25 H 5.2623 -1.1524 -17.2261 H 1 UNL1 0.1452  
 26 H 2.9575 -1.6636 -14.4277 H 1 UNL1 0.1679  
 27 H 3.1891 -3.0520 -13.3347 H 1 UNL1 0.1524  
 28 H 4.0553 3.0126 -12.9483 H 1 UNL1 0.1526  
 29 H 5.6303 2.4672 -12.2117 H 1 UNL1 0.1436  
 30 H 2.9949 2.1974 -16.3523 H 1 UNL1 0.1579  
 31 H 2.5605 2.4366 -14.5920 H 1 UNL1 0.1586  
 32 H 4.1507 0.0796 -9.7659 H 1 UNL1 0.1535  
 33 H 5.5876 0.2469 -10.8124 H 1 UNL1 0.1535  
 34 H 5.1515 1.5719 -9.7339 H 1 UNL1 0.1570  
 35 H 1.9492 2.5161 -11.7034 H 1 UNL1 0.1588

|                   |        |         |              |        |         |
|-------------------|--------|---------|--------------|--------|---------|
| 36 H              | 1.9921 | 1.4078  | -10.3111 H   | 1 UNL1 | 0.1539  |
| 37 H              | 2.9944 | 2.8845  | -10.2170 H   | 1 UNL1 | 0.1601  |
| 38 H              | 6.1270 | -2.1603 | -12.1754 H   | 1 UNL1 | 0.1649  |
| 39 H              | 5.5844 | -3.8026 | -12.5789 H   | 1 UNL1 | 0.1756  |
| 40 H              | 6.9907 | -3.0795 | -13.3586 H   | 1 UNL1 | 0.1730  |
| @<TRIPOS>BOND     |        |         |              |        |         |
| 1                 | 25     | 19      | 1            |        |         |
| 2                 | 3      | 20      | 1            |        |         |
| 3                 | 30     | 12      | 1            |        |         |
| 4                 | 24     | 19      | 1            |        |         |
| 5                 | 19     | 20      | 1            |        |         |
| 6                 | 19     | 18      | 1            |        |         |
| 7                 | 20     | 2       | 1            |        |         |
| 8                 | 20     | 21      | 1            |        |         |
| 9                 | 7      | 18      | 1            |        |         |
| 10                | 12     | 21      | 2            |        |         |
| 11                | 12     | 31      | 1            |        |         |
| 12                | 13     | 18      | 1            |        |         |
| 13                | 13     | 17      | 1            |        |         |
| 14                | 18     | 17      | 1            |        |         |
| 15                | 21     | 22      | 1            |        |         |
| 16                | 26     | 16      | 1            |        |         |
| 17                | 17     | 16      | 1            |        |         |
| 18                | 17     | 6       | 1            |        |         |
| 19                | 16     | 27      | 1            |        |         |
| 20                | 16     | 23      | 1            |        |         |
| 21                | 22     | 9       | 1            |        |         |
| 22                | 22     | 1       | 1            |        |         |
| 23                | 22     | 14      | 1            |        |         |
| 24                | 40     | 6       | 1            |        |         |
| 25                | 8      | 1       | 1            |        |         |
| 26                | 6      | 39      | 1            |        |         |
| 27                | 6      | 38      | 1            |        |         |
| 28                | 28     | 14      | 1            |        |         |
| 29                | 1      | 23      | 1            |        |         |
| 30                | 1      | 15      | 1            |        |         |
| 31                | 14     | 29      | 1            |        |         |
| 32                | 14     | 15      | 1            |        |         |
| 33                | 23     | 4       | 1            |        |         |
| 34                | 23     | 5       | 1            |        |         |
| 35                | 35     | 10      | 1            |        |         |
| 36                | 15     | 10      | 1            |        |         |
| 37                | 15     | 11      | 1            |        |         |
| 38                | 10     | 36      | 1            |        |         |
| 39                | 10     | 37      | 1            |        |         |
| 40                | 33     | 11      | 1            |        |         |
| 41                | 11     | 32      | 1            |        |         |
| 42                | 11     | 34      | 1            |        |         |
| Compound 45       |        |         |              |        |         |
| @<TRIPOS>MOLECULE |        |         |              |        |         |
| compuesto_45.out  |        |         |              |        |         |
| 42 43 0 0 0       |        |         |              |        |         |
| SMALL             |        |         |              |        |         |
| MULLIKEN_CHARGES  |        |         |              |        |         |
| @<TRIPOS>ATOM     |        |         |              |        |         |
| 1 H               | 6.3079 | 2.4454  | -11.1006 H   | 1 UNL1 | 0.1494  |
| 2 H               | 4.6247 | 2.5554  | -10.5697 H   | 1 UNL1 | 0.1550  |
| 3 H               | 5.3956 | 3.9228  | -11.4146 H   | 1 UNL1 | 0.1485  |
| 4 C               | 4.2480 | 0.3540  | -14.2557 C.3 | 1 UNL1 | -0.2469 |
| 5 C               | 3.7106 | -1.0780 | -14.2576 C.3 | 1 UNL1 | -0.3665 |
| 6 C               | 4.5134 | -2.0044 | -13.3314 C.3 | 1 UNL1 | 0.4009  |
| 7 C               | 4.3645 | -1.5363 | -11.8559 C.3 | 1 UNL1 | -0.1538 |
| 8 C               | 4.1829 | 0.0190  | -11.7307 C.3 | 1 UNL1 | -0.0598 |
| 9 C               | 4.8379 | 0.7959  | -12.8983 C.3 | 1 UNL1 | -0.1311 |

|               |    |         |         |              |   |      |         |
|---------------|----|---------|---------|--------------|---|------|---------|
| 10            | C  | 3.2529  | -2.2985 | -11.0981 C.3 | 1 | UNL1 | -0.2401 |
| 11            | C  | 2.6491  | -1.4993 | -9.9275 C.3  | 1 | UNL1 | -0.3021 |
| 12            | C  | 2.0506  | -0.2405 | -10.5184 C.2 | 1 | UNL1 | 0.0851  |
| 13            | C  | 2.7596  | 0.4241  | -11.4345 C.2 | 1 | UNL1 | -0.2655 |
| 14            | C  | 4.8205  | 2.3469  | -12.7541 C.3 | 1 | UNL1 | 0.0002  |
| 15            | H  | 4.7565  | 0.2984  | -10.8008 H   | 1 | UNL1 | 0.1246  |
| 16            | C  | 0.6839  | 0.1629  | -10.0783 C.3 | 1 | UNL1 | -0.4986 |
| 17            | H  | 5.3258  | -1.7806 | -11.3353 H   | 1 | UNL1 | 0.1267  |
| 18            | O  | 3.9309  | -3.3226 | -13.4407 O.3 | 1 | UNL1 | -0.5985 |
| 19            | C  | 5.9735  | -2.1763 | -13.7810 C.3 | 1 | UNL1 | -0.5815 |
| 20            | C  | 5.6797  | 3.0169  | -13.8485 C.3 | 1 | UNL1 | -0.4996 |
| 21            | C  | 5.3151  | 2.8291  | -11.3786 C.3 | 1 | UNL1 | -0.4989 |
| 22            | H  | 5.0384  | 0.4573  | -15.0185 H   | 1 | UNL1 | 0.1233  |
| 23            | H  | 3.4276  | 1.0252  | -14.5751 H   | 1 | UNL1 | 0.1321  |
| 24            | H  | 3.7320  | -1.4743 | -15.2810 H   | 1 | UNL1 | 0.1331  |
| 25            | H  | 2.6529  | -1.0969 | -13.9262 H   | 1 | UNL1 | 0.1672  |
| 26            | H  | 5.9199  | 0.4981  | -12.8839 H   | 1 | UNL1 | 0.1219  |
| 27            | H  | 2.4073  | -2.5344 | -11.7775 H   | 1 | UNL1 | 0.1536  |
| 28            | H  | 3.6470  | -3.2738 | -10.7611 H   | 1 | UNL1 | 0.1346  |
| 29            | H  | 1.8837  | -2.0980 | -9.3951 H    | 1 | UNL1 | 0.1392  |
| 30            | H  | 3.4260  | -1.2467 | -9.1834 H    | 1 | UNL1 | 0.1425  |
| 31            | H  | 2.3688  | 1.3138  | -11.9151 H   | 1 | UNL1 | 0.1492  |
| 32            | H  | 3.7679  | 2.7001  | -12.8862 H   | 1 | UNL1 | 0.1146  |
| 33            | H  | -0.0636 | -0.6227 | -10.2359 H   | 1 | UNL1 | 0.1616  |
| 34            | H  | 0.6673  | 0.3868  | -8.9900 H    | 1 | UNL1 | 0.1614  |
| 35            | H  | 0.3388  | 1.0550  | -10.6311 H   | 1 | UNL1 | 0.1591  |
| 36            | H  | 4.1036  | -3.6759 | -14.3365 H   | 1 | UNL1 | 0.3105  |
| 37            | H  | 6.5429  | -1.2477 | -13.6276 H   | 1 | UNL1 | 0.1706  |
| 38            | H  | 6.4819  | -2.9418 | -13.1781 H   | 1 | UNL1 | 0.1692  |
| 39            | H  | 6.0367  | -2.5008 | -14.8387 H   | 1 | UNL1 | 0.1605  |
| 40            | H  | 5.6607  | 4.1152  | -13.6977 H   | 1 | UNL1 | 0.1501  |
| 41            | H  | 6.7283  | 2.6964  | -13.7930 H   | 1 | UNL1 | 0.1488  |
| 42            | H  | 5.3291  | 2.7782  | -14.8691 H   | 1 | UNL1 | 0.1492  |
| @<TRIPOS>BOND |    |         |         |              |   |      |         |
| 1             | 24 | 5       | 1       |              |   |      |         |
| 2             | 22 | 4       | 1       |              |   |      |         |
| 3             | 42 | 20      | 1       |              |   |      |         |
| 4             | 39 | 19      | 1       |              |   |      |         |
| 5             | 23 | 4       | 1       |              |   |      |         |
| 6             | 36 | 18      | 1       |              |   |      |         |
| 7             | 5  | 4       | 1       |              |   |      |         |
| 8             | 5  | 25      | 1       |              |   |      |         |
| 9             | 5  | 6       | 1       |              |   |      |         |
| 10            | 4  | 9       | 1       |              |   |      |         |
| 11            | 20 | 41      | 1       |              |   |      |         |
| 12            | 20 | 40      | 1       |              |   |      |         |
| 13            | 20 | 14      | 1       |              |   |      |         |
| 14            | 19 | 37      | 1       |              |   |      |         |
| 15            | 19 | 6       | 1       |              |   |      |         |
| 16            | 19 | 38      | 1       |              |   |      |         |
| 17            | 18 | 6       | 1       |              |   |      |         |
| 18            | 6  | 7       | 1       |              |   |      |         |
| 19            | 9  | 26      | 1       |              |   |      |         |
| 20            | 9  | 14      | 1       |              |   |      |         |
| 21            | 9  | 8       | 1       |              |   |      |         |
| 22            | 32 | 14      | 1       |              |   |      |         |
| 23            | 14 | 21      | 1       |              |   |      |         |
| 24            | 31 | 13      | 1       |              |   |      |         |
| 25            | 7  | 8       | 1       |              |   |      |         |
| 26            | 7  | 17      | 1       |              |   |      |         |
| 27            | 7  | 10      | 1       |              |   |      |         |
| 28            | 27 | 10      | 1       |              |   |      |         |
| 29            | 8  | 13      | 1       |              |   |      |         |
| 30            | 8  | 15      | 1       |              |   |      |         |
| 31            | 13 | 12      | 2       |              |   |      |         |
| 32            | 3  | 21      | 1       |              |   |      |         |

```

33 21 1 1
34 21 2 1
35 10 28 1
36 10 11 1
37 35 16 1
38 12 16 1
39 12 11 1
40 33 16 1
41 16 34 1
42 11 29 1
43 11 30 1

```

## Compound 46

@<TRIPOS>MOLECULE

compuesto\_46.out

42 43 0 0 0

SMALL

MULLIKEN\_CHARGES

@<TRIPOS>ATOM

|      |        |         |              |        |         |
|------|--------|---------|--------------|--------|---------|
| 1 H  | 4.7139 | 2.5515  | -10.8014 H   | 1 UNL1 | 0.1560  |
| 2 H  | 6.3936 | 2.4346  | -11.4004 H   | 1 UNL1 | 0.1497  |
| 3 H  | 4.2102 | -3.6562 | -14.6496 H   | 1 UNL1 | 0.3103  |
| 4 C  | 4.3290 | 0.3753  | -14.5261 C.3 | 1 UNL1 | -0.2472 |
| 5 C  | 4.8900 | 2.3576  | -13.0040 C.3 | 1 UNL1 | -0.0007 |
| 6 H  | 4.8460 | 0.2858  | -11.0732 H   | 1 UNL1 | 0.1248  |
| 7 C  | 0.7770 | 0.1192  | -10.3403 C.3 | 1 UNL1 | -0.4987 |
| 8 C  | 6.0697 | -2.1517 | -14.0863 C.3 | 1 UNL1 | -0.5812 |
| 9 C  | 5.7470 | 3.0415  | -14.0936 C.3 | 1 UNL1 | -0.5000 |
| 10 C | 5.3917 | 2.8258  | -11.6262 C.3 | 1 UNL1 | -0.4983 |
| 11 H | 5.4252 | -1.7834 | -11.6325 H   | 1 UNL1 | 0.1267  |
| 12 O | 4.0340 | -3.3127 | -13.7499 O.3 | 1 UNL1 | -0.5991 |
| 13 H | 5.1176 | 0.4899  | -15.2887 H   | 1 UNL1 | 0.1231  |
| 14 H | 3.5055 | 1.0447  | -14.8385 H   | 1 UNL1 | 0.1322  |
| 15 H | 3.8185 | -1.4454 | -15.5677 H   | 1 UNL1 | 0.1331  |
| 16 H | 2.7437 | -1.0877 | -14.2046 H   | 1 UNL1 | 0.1675  |
| 17 H | 6.0025 | 0.5160  | -13.1558 H   | 1 UNL1 | 0.1218  |
| 18 H | 2.5105 | -2.5501 | -12.0714 H   | 1 UNL1 | 0.1535  |
| 19 H | 3.7574 | -3.2912 | -11.0669 H   | 1 UNL1 | 0.1346  |
| 20 H | 1.9902 | -2.1403 | -9.6844 H    | 1 UNL1 | 0.1392  |
| 21 H | 3.5274 | -1.2832 | -9.4670 H    | 1 UNL1 | 0.1425  |
| 22 H | 2.4506 | 1.2994  | -12.1713 H   | 1 UNL1 | 0.1492  |
| 23 H | 3.8353 | 2.7076  | -13.1317 H   | 1 UNL1 | 0.1147  |
| 24 H | 0.0335 | -0.6643 | -10.5158 H   | 1 UNL1 | 0.1616  |
| 25 H | 0.7583 | 0.3210  | -9.2519 H    | 1 UNL1 | 0.1612  |
| 26 H | 0.4278 | 1.0220  | -10.8773 H   | 1 UNL1 | 0.1594  |
| 27 H | 6.6330 | -1.2191 | -13.9671 H   | 1 UNL1 | 0.1701  |
| 28 H | 6.5856 | -2.9153 | -13.4877 H   | 1 UNL1 | 0.1700  |
| 29 H | 6.1286 | -2.4727 | -15.1445 H   | 1 UNL1 | 0.1598  |
| 30 H | 5.4694 | 3.9178  | -11.6501 H   | 1 UNL1 | 0.1480  |
| 31 C | 4.2714 | 0.0137  | -12.0038 C.3 | 1 UNL1 | -0.0600 |
| 32 C | 4.4630 | -1.5405 | -12.1454 C.3 | 1 UNL1 | -0.1532 |
| 33 C | 4.6111 | -1.9905 | -13.6274 C.3 | 1 UNL1 | 0.4013  |
| 34 C | 3.7993 | -1.0593 | -14.5409 C.3 | 1 UNL1 | -0.3665 |
| 35 C | 2.7509 | -1.5317 | -10.2124 C.3 | 1 UNL1 | -0.3022 |
| 36 C | 3.3566 | -2.3156 | -11.3928 C.3 | 1 UNL1 | -0.2400 |
| 37 C | 4.9192 | 0.8073  | -13.1658 C.3 | 1 UNL1 | -0.1306 |
| 38 C | 2.8482 | 0.4073  | -11.7011 C.2 | 1 UNL1 | -0.2653 |
| 39 C | 2.1444 | -0.2699 | -10.7893 C.2 | 1 UNL1 | 0.0852  |
| 40 H | 5.7231 | 4.1377  | -13.9293 H   | 1 UNL1 | 0.1500  |
| 41 H | 6.7967 | 2.7249  | -14.0435 H   | 1 UNL1 | 0.1488  |
| 42 H | 5.3962 | 2.8175  | -15.1148 H   | 1 UNL1 | 0.1491  |

@<TRIPOS>BOND

```

1 15 34 1
2 13 4 1
3 29 8 1

```

4 42 9 1  
 5 14 4 1  
 6 3 12 1  
 7 34 4 1  
 8 34 16 1  
 9 34 33 1  
 10 4 37 1  
 11 9 41 1  
 12 9 40 1  
 13 9 5 1  
 14 8 27 1  
 15 8 33 1  
 16 8 28 1  
 17 12 33 1  
 18 33 32 1  
 19 37 17 1  
 20 37 5 1  
 21 37 31 1  
 22 23 5 1  
 23 5 10 1  
 24 22 38 1  
 25 32 31 1  
 26 32 11 1  
 27 32 36 1  
 28 18 36 1  
 29 31 38 1  
 30 31 6 1  
 31 38 39 2  
 32 30 10 1  
 33 10 2 1  
 34 10 1 1  
 35 36 19 1  
 36 36 35 1  
 37 26 7 1  
 38 39 7 1  
 39 39 35 1  
 40 24 7 1  
 41 7 25 1  
 42 35 20 1  
 43 35 21 1

### Compound 47

@<TRIPOS>MOLECULE  
 compuesto\_47.out  
 42 44 0 0 0  
 SMALL  
 MULLIKEN\_CHARGES

@<TRIPOS>ATOM  
 1 H 1.6187 -1.1750 -14.1055 H 1 UNL1 0.1511  
 2 H 1.9968 -2.7523 -13.5010 H 1 UNL1 0.1533  
 3 H 2.2146 -1.3627 -12.4086 H 1 UNL1 0.1602  
 4 H 3.0349 3.5433 -14.5902 H 1 UNL1 0.1533  
 5 H 1.8407 2.7535 -13.5718 H 1 UNL1 0.1502  
 6 H 5.2688 -3.0630 -14.6192 H 1 UNL1 0.1563  
 7 H 4.7569 -3.3038 -12.9006 H 1 UNL1 0.1857  
 8 H 3.7249 -3.7414 -14.2238 H 1 UNL1 0.1372  
 9 C 4.0607 0.0050 -11.6938 C.3 1 UNL1 -0.3569  
 10 C 4.5547 1.4143 -14.2194 C.3 1 UNL1 -0.1141  
 11 C 3.4712 0.6653 -15.0287 C.3 1 UNL1 -0.2984  
 12 C 5.5786 0.3715 -13.6867 C.3 1 UNL1 0.0772  
 13 C 4.7356 -0.6948 -12.8881 C.3 1 UNL1 0.2902  
 14 C 6.2912 -0.3609 -14.8541 C.3 1 UNL1 -0.2970  
 15 C 3.8246 -1.5598 -13.8612 C.3 1 UNL1 0.1658  
 16 C 3.8596 -0.8148 -15.2405 C.3 1 UNL1 -0.1079  
 17 C 5.2610 -0.8672 -15.8665 C.3 1 UNL1 -0.2696

|               |    |        |         |          |     |   |      |         |
|---------------|----|--------|---------|----------|-----|---|------|---------|
| 18            | C  | 3.2230 | 1.2339  | -12.0419 | C.3 | 1 | UNL1 | -0.2645 |
| 19            | C  | 3.8999 | 2.1921  | -13.0531 | C.3 | 1 | UNL1 | -0.0458 |
| 20            | O  | 5.6562 | -1.6544 | -12.3031 | O.3 | 1 | UNL1 | -0.5992 |
| 21            | C  | 6.6816 | 1.0394  | -12.8407 | C.3 | 1 | UNL1 | -0.5214 |
| 22            | C  | 2.8576 | 3.2044  | -13.5563 | C.3 | 1 | UNL1 | -0.4970 |
| 23            | C  | 4.4237 | -2.9762 | -13.9220 | C.3 | 1 | UNL1 | -0.5080 |
| 24            | C  | 2.3455 | -1.7109 | -13.4428 | C.3 | 1 | UNL1 | -0.5222 |
| 25            | H  | 5.4873 | -1.9081 | -16.1777 | H   | 1 | UNL1 | 0.1300  |
| 26            | H  | 5.3061 | -0.2495 | -16.7785 | H   | 1 | UNL1 | 0.1273  |
| 27            | H  | 3.1320 | -1.2959 | -15.9273 | H   | 1 | UNL1 | 0.1186  |
| 28            | H  | 7.0185 | 0.2849  | -15.3728 | H   | 1 | UNL1 | 0.1280  |
| 29            | H  | 6.8731 | -1.2153 | -14.4249 | H   | 1 | UNL1 | 0.1485  |
| 30            | H  | 3.2571 | 1.1444  | -16.0071 | H   | 1 | UNL1 | 0.1267  |
| 31            | H  | 2.5190 | 0.7137  | -14.4684 | H   | 1 | UNL1 | 0.1422  |
| 32            | H  | 5.0910 | 2.1490  | -14.8617 | H   | 1 | UNL1 | 0.1227  |
| 33            | H  | 4.8638 | 0.2887  | -10.9991 | H   | 1 | UNL1 | 0.1374  |
| 34            | H  | 3.4708 | -0.7282 | -11.0993 | H   | 1 | UNL1 | 0.1501  |
| 35            | H  | 2.2451 | 0.9141  | -12.4577 | H   | 1 | UNL1 | 0.1370  |
| 36            | H  | 3.0218 | 1.7964  | -11.1088 | H   | 1 | UNL1 | 0.1255  |
| 37            | H  | 4.7038 | 2.7518  | -12.5177 | H   | 1 | UNL1 | 0.1152  |
| 38            | H  | 6.3352 | -1.2194 | -11.7715 | H   | 1 | UNL1 | 0.3030  |
| 39            | H  | 7.4469 | 0.2892  | -12.6272 | H   | 1 | UNL1 | 0.1493  |
| 40            | H  | 7.1468 | 1.8544  | -13.4112 | H   | 1 | UNL1 | 0.1575  |
| 41            | H  | 6.3850 | 1.4965  | -11.8822 | H   | 1 | UNL1 | 0.1556  |
| 42            | H  | 2.8376 | 4.0703  | -12.8722 | H   | 1 | UNL1 | 0.1471  |
| @<TRIPOS>BOND |    |        |         |          |     |   |      |         |
| 1             | 26 | 17     | 1       |          |     |   |      |         |
| 2             | 25 | 17     | 1       |          |     |   |      |         |
| 3             | 30 | 11     | 1       |          |     |   |      |         |
| 4             | 27 | 16     | 1       |          |     |   |      |         |
| 5             | 17 | 16     | 1       |          |     |   |      |         |
| 6             | 17 | 14     | 1       |          |     |   |      |         |
| 7             | 28 | 14     | 1       |          |     |   |      |         |
| 8             | 16 | 11     | 1       |          |     |   |      |         |
| 9             | 16 | 15     | 1       |          |     |   |      |         |
| 10            | 11 | 31     | 1       |          |     |   |      |         |
| 11            | 11 | 10     | 1       |          |     |   |      |         |
| 12            | 32 | 10     | 1       |          |     |   |      |         |
| 13            | 14 | 29     | 1       |          |     |   |      |         |
| 14            | 14 | 12     | 1       |          |     |   |      |         |
| 15            | 6  | 23     | 1       |          |     |   |      |         |
| 16            | 4  | 22     | 1       |          |     |   |      |         |
| 17            | 8  | 23     | 1       |          |     |   |      |         |
| 18            | 10 | 12     | 1       |          |     |   |      |         |
| 19            | 10 | 19     | 1       |          |     |   |      |         |
| 20            | 1  | 24     | 1       |          |     |   |      |         |
| 21            | 23 | 15     | 1       |          |     |   |      |         |
| 22            | 23 | 7      | 1       |          |     |   |      |         |
| 23            | 15 | 24     | 1       |          |     |   |      |         |
| 24            | 15 | 13     | 1       |          |     |   |      |         |
| 25            | 12 | 13     | 1       |          |     |   |      |         |
| 26            | 12 | 21     | 1       |          |     |   |      |         |
| 27            | 5  | 22     | 1       |          |     |   |      |         |
| 28            | 22 | 19     | 1       |          |     |   |      |         |
| 29            | 22 | 42     | 1       |          |     |   |      |         |
| 30            | 2  | 24     | 1       |          |     |   |      |         |
| 31            | 24 | 3      | 1       |          |     |   |      |         |
| 32            | 40 | 21     | 1       |          |     |   |      |         |
| 33            | 19 | 37     | 1       |          |     |   |      |         |
| 34            | 19 | 18     | 1       |          |     |   |      |         |
| 35            | 13 | 20     | 1       |          |     |   |      |         |
| 36            | 13 | 9      | 1       |          |     |   |      |         |
| 37            | 21 | 39     | 1       |          |     |   |      |         |
| 38            | 21 | 41     | 1       |          |     |   |      |         |
| 39            | 35 | 18     | 1       |          |     |   |      |         |
| 40            | 20 | 38     | 1       |          |     |   |      |         |

|    |    |    |   |
|----|----|----|---|
| 41 | 18 | 9  | 1 |
| 42 | 18 | 36 | 1 |
| 43 | 9  | 34 | 1 |
| 44 | 9  | 33 | 1 |
